# Supplementary material for: Iron-catalyzed cross-dehydrogenative C–H amidation of benzofurans and benzothiophenes with anilines
Source: Royal Society of Chemistry journal article supplement (doi:10.1039/d0qo01651a), 2021-01-01

# **Iron-catalyzed Cross-Dehydrogenative C–H Amidation of Benzofurans and Benzothiophenes with Anilines**

Yang Ni, Xiang Wan, Honghua Zuo, Muhammad Adnan Bashir, Yu Liu, Huai-Bin Yu,  
Rong-Zhen Liao, Guojiao Wu\*, and Fangrui Zhong\*

Hubei Key Laboratory of Bioinorganic Chemistry & Materia Medica, School of  
Chemistry and Chemical Engineering, Huazhong University of Science and  
Technology (HUST)

1037 Luoyu road, Wuhan 430074, China

E-mail: [chemzfr@hust.edu.cn](mailto:chemzfr@hust.edu.cn)

# Contents

|                                                |           |
|------------------------------------------------|-----------|
| <b>1. General Information .....</b>            | <b>3</b>  |
| <b>2. Synthetic Procedures.....</b>            | <b>3</b>  |
| <b>3. Mechanistic Experiments.....</b>         | <b>4</b>  |
| <b>4. Analytical Data of Products.....</b>     | <b>7</b>  |
| <b>5. X-Ray Crystallographic Analysis.....</b> | <b>31</b> |
| <b>6. NMR Spectra of Products.....</b>         | <b>36</b> |

## 1. General Information

Compounds and solvents were purchased from commercial sources and were used as received without further purification unless stated otherwise. All products were purified by flash chromatography on silica gel (200-300 mesh). The chemical yields referred are isolated products.  $^1\text{H}$  NMR and  $^{13}\text{C}$  NMR spectra were recorded on 400 MHz or 600 MHz Bruker spectrometers. Chemical shifts are reported in part per million relative to residual solvent of  $\text{CDCl}_3$  (7.26 ppm for  $^1\text{H}$  NMR, 77.16 ppm for  $^{13}\text{C}$  NMR). Infrared spectra (IR) were recorded on Bruker EQUINAX55 spectrometer. Circular dichroism (CD) spectra were recorded on a JASCO J-810 spectrometer. Circular polarized luminescence (CPL) spectra were measured on a JASCO CPL-200 spectrometer. The used abbreviations are as follows: s (singlet), d (doublet), t (triplet), quart. (quartet), quint. (quintet), m (multiplet), br (broad). Multiplets which arise from accidental equality of coupling constants of magnetically non-equivalent protons are marked as virtual (virt.). High resolution mass spectra (HRMS) data were measured on a ESI-microTOF II. Melting points were measured on a SGW<sup>®</sup> X-4B and are not corrected. Reactions were monitored by TLC analysis using silica gel 60 Å F-254 thin layer plates and compounds were visualized with a UV light at 254 nm or 365 nm. Further visualization was achieved by staining with iodine, or  $\text{KMnO}_4$  followed by heating on a hot plate. Flash column chromatography was performed on silica gel 60 Å, 10–40  $\mu\text{m}$ .

## 2. Synthetic Procedures

### General procedures for direct amidation of aromatic C–H bond.

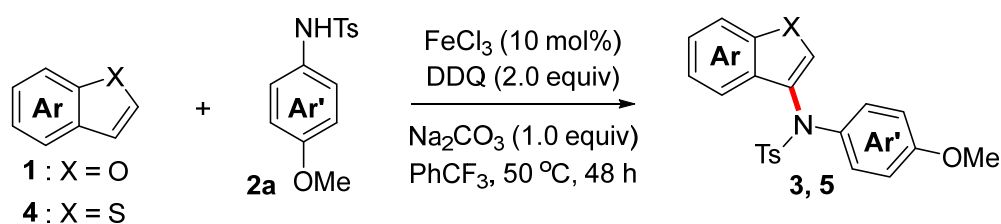

To a stirred solution of aniline **2** (0.4 mmol), DDQ (0.4 mmol, 90.8 mg),  $\text{FeCl}_3$  (0.02

mmol, 3.24 mg) and Na<sub>2</sub>CO<sub>3</sub> (0.2 mmol, 21.2 mg) in 2.0 mL dry PhCF<sub>3</sub>, were added benzofuran or benzothiophene **1** (0.2 mmol) under air and the resulting mixture heated to 50 °C for 48 h. The reaction was then cooled, the mixture was concentrated under vacuum, and the crude product was purified by flash chromatography on silica gel with petroleum ether/ethyl acetate (60/1 to 30/1 to 15/1) as an eluent to afford the product.

### 3. Mechanistic Experiments

#### 3.1 EPR experiment

##### Procedure for EPR studies of the reaction between DDQ and aniline **2a**.

To a stirred solution of aniline **2a** (0.1 mmol, 27.7 mg) and DDQ (0.12 mmol, 27.2 mg) in 2.5 mL dry PhCF<sub>3</sub> under air and the resulting mixture heated to 50 °C. After 1 hour, 20.0 μL of the reaction mixture was taken out into a small tube and analyzed by EPR at room temperature (Figure S1).

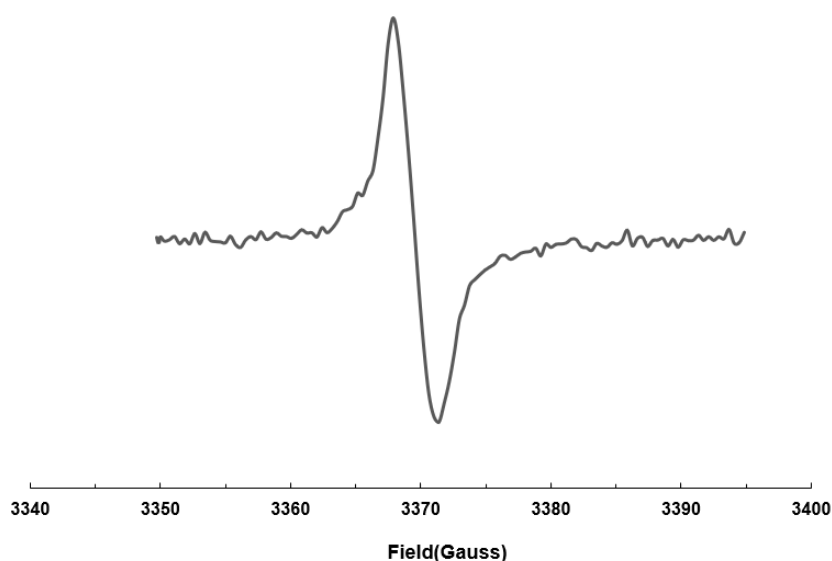

Figure S1. EPR spectra of DDQ and aniline **2a** mixture in PhCF<sub>3</sub>.

#### 3.2 The radical trapping experiments

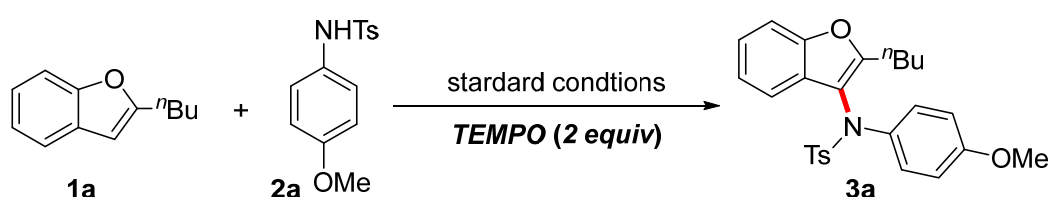

To a stirred solution of aniline **2a** (0.4 mmol, 110.8 mg), DDQ (0.4 mmol, 90.8 mg), FeCl<sub>3</sub> (0.02 mmol, 3.24 mg), Na<sub>2</sub>CO<sub>3</sub> (0.2 mmol, 21.2 mg) and TEMPO (0.4 mol, 62.5 mg) in 2.0 mL dry PhCF<sub>3</sub>, were added 2-butylbenzofuran **1a** (0.2 mmol, 34.9 mg) under air and the resulting mixture was heated to 50 °C for 48 h.

It was found that no reaction took place and only starting materials were detected (**1a** and **2a** was recovered in 99% and 75% respectively).

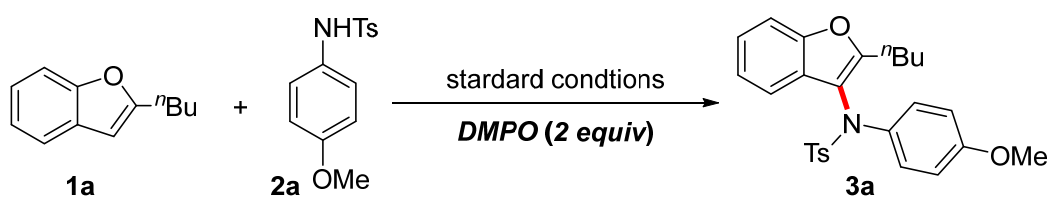

To a stirred solution of aniline **2a** (0.4 mmol, 110.8 mg), DDQ (0.4 mmol, 90.8 mg), FeCl<sub>3</sub> (0.02 mmol, 3.24 mg), Na<sub>2</sub>CO<sub>3</sub> (0.2 mmol, 21.2 mg) and DMPO (0.4 mol, 45.2 mg) in 2.0 mL dry PhCF<sub>3</sub>, were added 2-butylbenzofuran **1a** (0.2 mmol, 34.9 mg) under air and the resulting mixture was heated to 50 °C for 48 h.

It was found that no reaction took place and only starting materials were detected.

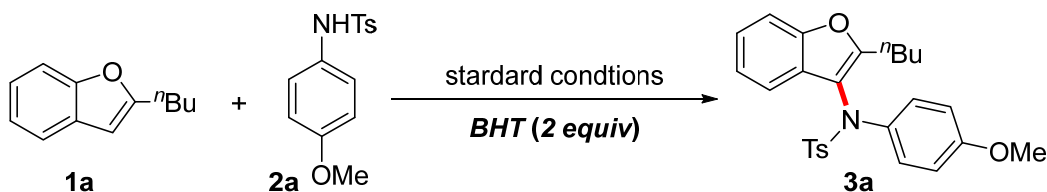

To a stirred solution of aniline **2a** (0.2 mmol, 55.4 mg), DDQ (0.4 mmol, 90.8 mg), FeCl<sub>3</sub> (0.02 mmol, 3.24 mg), Na<sub>2</sub>CO<sub>3</sub> (0.2 mmol, 21.6 mg) and BHT (0.4 mol, 88.2 mg) in 2.0 mL dry PhCF<sub>3</sub>, were added 2-butylbenzofuran **1a** (0.2 mmol, 34.9 mg) under air and the resulting mixture was heated to 50 °C for 48 h. The reaction was then cooled, the mixture was concentrated under vacuum, and the crude product was purified by flash chromatography on silica gel with petroleum ether/ethyl acetate (60/1 to 30/1 to 15/1) as an eluent to afford the product **3a** (3.5 mg, <5%). The majority of starting materials **1a** and **2a** was recovered.

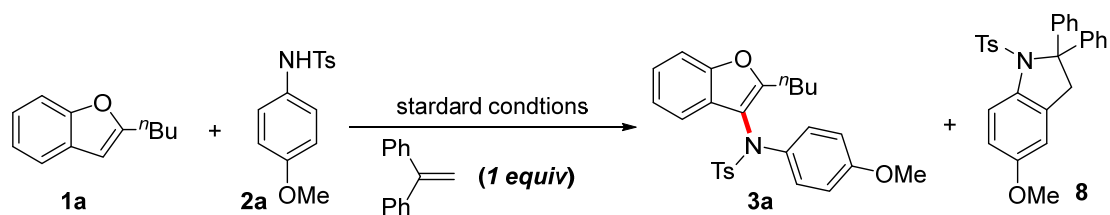

To a stirred solution of aniline **2a** (0.2 mmol, 55.4 mg), DDQ (0.4 mmol, 90.8 mg), FeCl<sub>3</sub> (0.02 mmol, 3.24 mg), Na<sub>2</sub>CO<sub>3</sub> (0.2 mmol, 21.6 mg) in 2.0 mL dry PhCF<sub>3</sub>, were added 2-butylbenzofuran **1a** (0.2 mmol, 34.9 mg), 1,1-diphenylethylene (0.2 mol, 36.5 mg) under air and the resulting mixture was heated to 50 °C for 48 h. The reaction was then cooled, the mixture was concentrated under vacuum, and the crude product was purified by flash chromatography on silica gel with petroleum ether/ethyl acetate (60/1 to 30/1 to 15/1) as an eluent to afford the product **3a** (27.8 mg, 31%) and **8** (8.2 mg, 9%).

The above radical trapping experiments suggested that a radical mechanism is likely involved in the present amination reaction.

### 3.4 self-amination of aniline **2a**

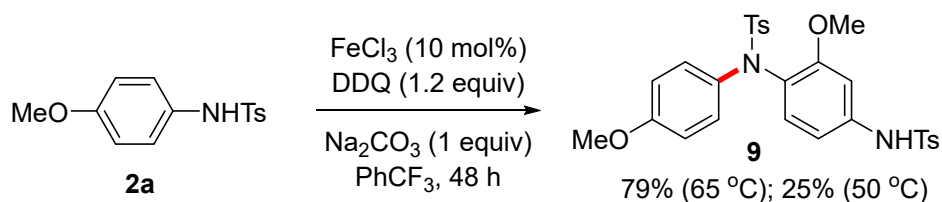

To a stirred solution of aniline **2a** (0.2 mmol, 55.4 mg), DDQ (0.24 mmol, 54.5 mg), FeCl<sub>3</sub> (0.02 mmol, 3.24 mg) and Na<sub>2</sub>CO<sub>3</sub> (0.2 mmol, 21.2 mg) in 2.0 mL dry PhCF<sub>3</sub>, under air and the resulting mixture heated to 50°C or 65 °C for 48h. The reaction was then cooled, the mixture was concentrated under vacuum, and the crude product was purified by flash chromatography on silica gel with petroleum ether/ethyl acetate (20/1 to 10/1) as an eluent to afford the product.

## 4. Analytical Data of Products.

### *N*-(2-Butylbenzofuran-3-yl)-*N*-(4-Methoxyphenyl)-4-

#### Methylbenzenesulfonamide (3a)

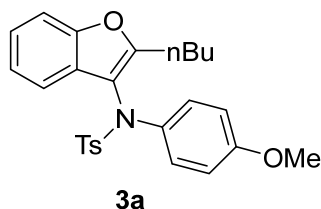

Compound **3a** was synthesized following the general procedure.

A white solid, 74.6 mg, 83% yield.

**m.p.:** 65 °C – 67 °C

**TLC:**  $R_f = 0.47$  (Hexane/EtOAc = 6:1)

**IR (KBr):** 2960, 1604, 1508, 1453, 1349, 1252, 1165, 747, 668, 592, 550  $\text{cm}^{-1}$

**$^1\text{H}$  NMR** (600 MHz,  $\text{CDCl}_3$ ):  $\delta$  (ppm) 7.67 – 7.63 (m, 2H), 7.42 – 7.37 (m, 1H), 7.39 – 7.33 (m, 2H), 7.31 – 7.26 (m, 2H), 7.25 – 7.19 (m, 1H), 7.15 – 7.09 (m, 1H), 7.08 – 7.03 (m, 1H), 6.87 – 6.81 (m, 2H), 3.79 (s, 3H), 2.80 – 2.74 (m, 2H), 2.48 (s, 3H), 1.69 – 1.62 (m, 2H), 1.41 – 1.33 (m, 2H), 0.93 (t,  $J = 7.4$  Hz, 3H).

**$^{13}\text{C}$  NMR** (151 MHz,  $\text{CDCl}_3$ ):  $\delta$  (ppm) 159.0, 158.6, 153.1, 143.7, 137.7, 134.2, 129.54, 128.7, 127.9, 126.3, 123.7, 122.8, 119.1, 118.3, 114.3, 111.4, 55.4, 29.3, 25.9, 22.6, 21.6, 13.8.

**HRMS (ESI):**  $\text{C}_{26}\text{H}_{28}\text{NO}_4\text{S}$   $[\text{M}+\text{H}]^+$ : calcd.: 450.1734; found: 450.1734.

### *N*-(2-Butylbenzofuran-3-yl)-*N*-(4-Methoxy-2-methylphenyl)-4-

#### Methylbenzenesulfonamide (3b)

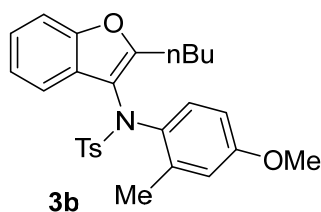

Compound **3b** was synthesized following the general procedure.

A colorless oil, 79.7 mg, 86% yield.

**TLC:**  $R_f$  = 0.46 (Hexane/EtOAc = 6:1)

**IR (KBr):** 2959, 1603, 1498, 1453, 1353, 1223, 1164, 1046, 748, 670, 601, 544  $\text{cm}^{-1}$

**$^1\text{H}$  NMR (600 MHz,  $\text{CDCl}_3$ ):**  $\delta$  (ppm) 7.65 – 7.61 (m, 2H), 7.41 – 7.36 (m, 1H), 7.30 – 7.23 (m, 4H), 7.23 – 7.19 (m, 1H), 7.15 – 7.08 (m, 1H), 6.79 – 6.74 (m, 1H), 6.67 (dd,  $J$  = 8.8, 3.0 Hz, 1H), 3.78 (s, 3H), 2.81 – 2.70 (m, 2H), 2.47 (s, 3H), 2.46 (s, 3H), 1.60 – 1.54 (m, 2H), 1.41 – 1.34 (m, 2H), 0.93 (t,  $J$  = 7.3 Hz, 3H).

**$^{13}\text{C}$  NMR (151 MHz,  $\text{CDCl}_3$ ):**  $\delta$  (ppm) 158.9, 158.2, 153.0, 143.7, 139.8, 137.6, 132.5, 129.7, 129.5, 128.1, 126.2, 123.5, 122.6, 120.2, 117.5, 116.6, 111.4, 111.2, 55.3, 29.4, 26.8, 22.7, 21.6, 19.6, 13.8.

**HRMS (ESI):**  $\text{C}_{27}\text{H}_{30}\text{NO}_4\text{S}$   $[\text{M}+\text{H}]^+$ : calcd.: 464.1890; found: 464.1889.

### ***N*-(2-Butylbenzofuran-3-yl)-*N*-(4-Methoxy-3-methylphenyl)-4-**

#### **Methylbenzenesulfonamide (3c)**

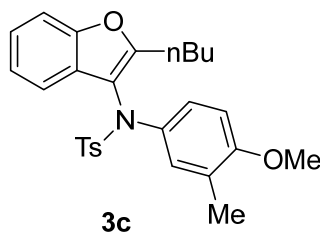

Compound **3c** was synthesized following the general procedure.

A white solid, 69.5 mg, 75% yield.

**m.p.:** 84 °C – 86 °C

**TLC:**  $R_f$  = 0.42 (Hexane/EtOAc = 6:1)

**IR (KBr):** 2955, 1600, 1502, 1454, 1350, 1228, 1165, 1032, 745, 667, 607, 566  $\text{cm}^{-1}$

**$^1\text{H}$  NMR (600 MHz,  $\text{CDCl}_3$ ):**  $\delta$  (ppm) 7.70 – 7.63 (m, 2H), 7.40 (d,  $J$  = 8.2 Hz, 1H), 7.31 – 7.26 (m, 2H), 7.25 – 7.18 (m, 3H), 7.15 – 7.07 (m, 2H), 6.74 (d,  $J$  = 8.3 Hz, 1H), 3.81 (s, 3H), 2.78 (m, 2H), 2.48 (s, 3H), 2.18 (s, 3H), 1.70 – 1.60 (m, 2H), 1.41 – 1.35 (m, 2H), 0.95 (t,  $J$  = 7.4 Hz, 3H).



$^{13}\text{C}$  NMR (151 MHz,  $\text{CDCl}_3$ ):  $\delta$  (ppm) 158.9, 157.0, 153.1, 143.6, 137.8, 133.6, 130.0, 129.5, 127.9, 127.6, 126.3, 125.9, 123.7, 122.8, 119.1, 118.4, 111.3, 110.0, 55.4, 29.4, 25.9, 22.7, 21.6, 16.3, 13.8.

HRMS (ESI):  $\text{C}_{27}\text{H}_{30}\text{NO}_4\text{S}$   $[\text{M}+\text{H}]^+$ : calcd.: 464.1890; found: 464.1887.

### *N*-(2-Butylbenzofuran-3-yl)-*N*-(2,4-Dimethoxyphenyl)-4-

#### Methylbenzenesulfonamide (3d)

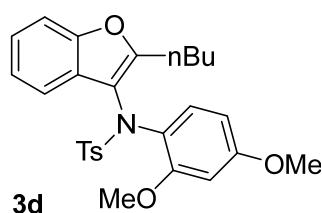

Compound **3d** was synthesized following the general procedure.

A colorless oil, 74.8 mg, 78% yield.

TLC:  $R_f$  = 0.46 (Hexane/EtOAc = 6:1)

IR (KBr): 2927, 1606, 1507, 1455, 1350, 1210, 1164, 1036, 750, 672, 557  $\text{cm}^{-1}$

$^1\text{H}$  NMR (400 MHz,  $\text{CDCl}_3$ ):  $\delta$  (ppm) 7.71 – 7.62 (m, 2H), 7.41 – 7.32 (m, 3H), 7.27 – 7.22 (m, 2H), 7.23 – 7.08 (m, 2H), 6.50 – 6.37 (m, 2H), 3.79 (s, 3H), 3.74 (s, 3H), 2.80 – 2.69 (m, 2H), 2.46 (s, 3H), 1.62 – 1.50 (m, 2H), 1.43 – 1.32 (m, 2H), 0.93 (t,  $J$  = 7.3 Hz, 3H).

$^{13}\text{C}$  NMR (101 MHz,  $\text{CDCl}_3$ ):  $\delta$  (ppm) 160.6, 159.1, 157.4, 153.0, 143.2, 138.1, 131.2, 129.1, 128.1, 126.7, 123.4, 122.7, 122.5, 119.9, 117.8, 111.0, 104.2, 99.5, 55.4, 55.0, 29.4, 26.0, 22.8, 21.5, 13.8.

HRMS (ESI):  $\text{C}_{27}\text{H}_{30}\text{NO}_5\text{S}$   $[\text{M}+\text{H}]^+$ : calcd.: 480.1839; found: 480.1837.

### *N*-(2-Butylbenzofuran-3-yl)-*N*-(2-Fluoro-4-methoxyphenyl)-4-

#### Methylbenzenesulfonamide (3e)

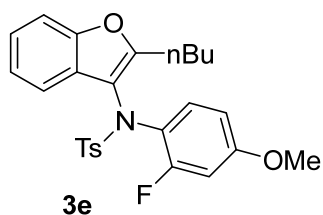

Compound **3e** was synthesized following the general procedure.

A white solid, 71.1 mg, 76% yield.

**m.p.:** 58 °C – 60 °C

**TLC:**  $R_f$  = 0.42 (Hexane/EtOAc = 6:1)

**IR (KBr):** 2925, 1618, 1510, 1455, 1355, 1223, 1163, 1090, 748, 670, 539  $\text{cm}^{-1}$

**$^1\text{H}$  NMR** (600 MHz,  $\text{CDCl}_3$ ):  $\delta$  (ppm) 7.71 – 7.65 (m, 2H), 7.45 – 7.34 (m, 2H), 7.31 – 7.26 (m, 3H), 7.25 – 7.18 (m, 1H), 7.18 – 7.12 (m, 1H), 6.71 – 6.63 (m, 2H), 3.79 (s, 3H), 2.71 (m, 2H), 2.47 (s, 3H), 1.60 – 1.53 (m, 2H), 1.37 – 1.31 (m, 2H), 0.92 (t,  $J$  = 7.3 Hz, 3H).

**$^{13}\text{C}$  NMR** (101 MHz,  $\text{CDCl}_3$ ):  $\delta$  (ppm) 160.54 (d,  $J$  = 10.6 Hz), 159.88 (d,  $J$  = 251.1 Hz), 159.47, 153.09, 143.85, 137.27, 131.30, 129.45, 128.13, 126.18, 123.31 (d,  $J$  = 87.0 Hz), 121.39 (d,  $J$  = 13.3 Hz), 119.38 (d,  $J$  = 3.0 Hz), 117.50, 111.23, 110.14 (d,  $J$  = 3.0 Hz), 102.84, 102.60, 55.75, 29.34, 25.74 (d,  $J$  = 2.8 Hz), 22.67, 21.60, 13.81.

**HRMS (ESI):**  $\text{C}_{26}\text{H}_{27}\text{FNO}_4\text{S}$   $[\text{M}+\text{H}]^+$ : calcd.: 468.1639; found: 468.1638.

### ***N*-(2-Butylbenzofuran-3-yl)-*N*-(3-Fluoro-4-methoxyphenyl)-4-**

#### **Methylbenzenesulfonamide (3f)**

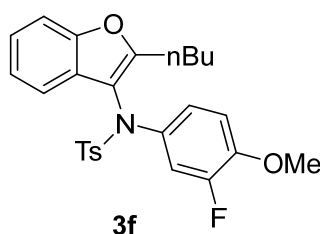

Compound **3f** was synthesized following the general procedure.

A white solid, 67.3 mg, 72% yield.

**m.p.:** 81 °C – 83 °C

**TLC:**  $R_f$  = 0.44 (Hexane/EtOAc = 6:1)

**IR (KBr):** 2922, 1514, 1454, 1348, 1270, 1224, 1166, 1026, 749, 668, 622, 558 cm<sup>-1</sup>

**<sup>1</sup>H NMR (600 MHz, CDCl<sub>3</sub>):** δ (ppm) 7.68 – 7.61 (m, 2H), 7.44 – 7.38 (m, 1H), 7.30 – 7.28 (m, 2H), 7.26 – 7.14 (m, 3H), 7.14 – 7.08 (m, 1H), 6.98 (dd, *J* = 7.8, 1.2 Hz, 1H), 6.88 (t, *J* = 8.9 Hz, 1H), 3.88 (s, 3H), 2.74 (m, 2H), 2.48 (s, 3H), 1.68 – 1.59 (m, 2H), 1.39 – 1.29 (m, 2H), 0.92 (t, *J* = 7.4 Hz, 3H).

**<sup>13</sup>C NMR (101 MHz, CDCl<sub>3</sub>):** δ (ppm) 159.3, 153.2, 151.2 (d, *J* = 248.0 Hz), 146.8 (d, *J* = 10.6 Hz), 144.0, 137.3, 134.2, 129.6, 127.9, 126.0, 123.9, 123.0 (d, *J* = 3.9 Hz), 123.0, 118.9, 117.9, 115.2 (d, *J* = 20.0 Hz), 113.1 (d, *J* = 2.6 Hz), 111.5, 56.3, 29.3, 25.8, 22.6, 21.6, 13.8.

**HRMS (ESI):** C<sub>26</sub>H<sub>27</sub>FNO<sub>4</sub>S [M+H]<sup>+</sup>: calcd.: 468.1639; found: 468.1640.

### *N*-(2-Butylbenzofuran-3-yl)-*N*-(3-Chloro-4-methoxyphenyl)-4-

#### Methylbenzenesulfonamide (3g)

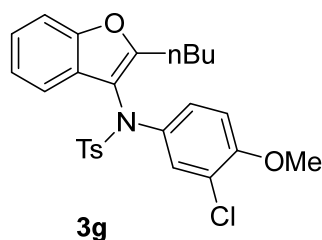

Compound **3g** was synthesized following the general procedure.

A colorless oil, 70.7 mg, 73% yield.

**TLC:** *R<sub>f</sub>* = 0.49 (Hexane/EtOAc = 6:1)

**IR (KBr):** 2925, 1496, 1454, 1356, 1263, 1165, 1062, 749, 670, 608, 562 cm<sup>-1</sup>

**<sup>1</sup>H NMR (600 MHz, CDCl<sub>3</sub>):** δ (ppm) 7.69 – 7.60 (m, 2H), 7.44 – 7.38 (m, 2H), 7.33 (dd, *J* = 8.9, 2.7 Hz, 1H), 7.30 – 7.29 (m, 1H), 7.26 – 7.19 (m, 1H), 7.17 – 7.08 (m, 1H), 7.04 – 6.95 (m, 1H), 6.86 (d, *J* = 8.9 Hz, 1H), 3.89 (s, 3H), 2.73 (m, 2H), 2.48 (s, 3H), 1.67 – 1.61 (m, 2H), 1.38 – 1.30 (m, 2H), 0.92 (t, *J* = 7.4 Hz, 3H).

**<sup>13</sup>C NMR (151 MHz, CDCl<sub>3</sub>):** δ (ppm) 159.2, 154.1, 153.1, 144.0, 137.3, 134.5, 129.6, 128.9, 127.9, 126.6, 126.0, 123.9, 123.0, 122.5, 118.9, 117.9, 111.9, 111.5, 56.3, 29.3, 25.8, 22.6, 21.6, 13.8.

**HRMS (ESI):** C<sub>26</sub>H<sub>27</sub><sup>35</sup>ClNO<sub>4</sub>S [M+H]<sup>+</sup>: calcd.: 484.1344; found: 484.1342.

**N-(2-Butylbenzofuran-3-yl)-4-Methyl-N-(4-Phenoxyphenyl)-**

**Benzenesulfonamide (3h)**

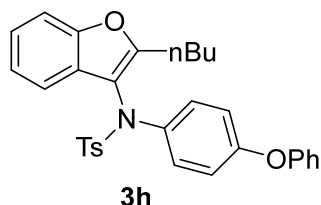

Compound **3h** was synthesized following the general procedure.

A white solid, 61.4 mg, 60% yield.

**m.p.:** 84 °C – 86 °C

**TLC:**  $R_f$  = 0.51 (Hexane/EtOAc = 6:1)

**IR (KBr):** 2925, 1590, 1489, 1353, 1224, 1165, 1096, 751, 665 594, 564  $\text{cm}^{-1}$

**$^1\text{H NMR}$  (400 MHz,  $\text{CDCl}_3$ ):**  $\delta$  (ppm) 7.70 – 7.63 (m, 2H), 7.43 – 7.32 (m, 5H), 7.30 – 7.29 (m, 1H), 7.28 – 7.27 (m, 1H), 7.25 – 7.19 (m, 1H), 7.17 – 7.08 (m, 2H), 7.05 – 6.98 (m, 3H), 6.95 – 6.89 (m, 2H), 2.84 – 2.67 (m, 2H), 2.47 (s, 3H), 1.70 – 1.64 (m, 2H), 1.38 – 1.31 (m, 2H), 0.92 (t,  $J$  = 7.3 Hz, 3H).

**$^{13}\text{C NMR}$  (101 MHz,  $\text{CDCl}_3$ ):**  $\delta$  (ppm) 159.1, 156.5, 156.4, 153.1, 143.8, 137.5, 136.4, 129.8, 129.5, 128.4, 127.9, 126.2, 123.8, 123.7, 122.9, 119.3, 119.0, 118.9, 118.1, 111.4, 29.3, 25.9, 22.6, 21.6, 13.8.

**HRMS (ESI):**  $\text{C}_{31}\text{H}_{30}\text{NO}_4\text{S}$   $[\text{M}+\text{H}]^+$ : calcd.: 512.1890; found: 512.1890.

**N-(2-Butylbenzofuran-3-yl)-4-Methyl-N-(4-(Methylthio)-Phenyl)-**

**Benzenesulfonamide (3i)**

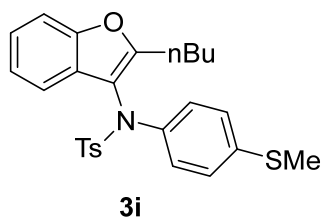

Compound **3i** was synthesized following the general procedure.

A white solid, 52.1 mg, 56% yield.

**m.p.:** 71 °C – 73 °C

**TLC:**  $R_f$  = 0.46 (Hexane/EtOAc = 6:1)

**IR (KBr):** 2923, 1594, 1490, 1453, 1350, 1234, 1163, 961, 815, 748, 666, 572  $\text{cm}^{-1}$

**$^1\text{H}$  NMR (400 MHz,  $\text{CDCl}_3$ ):**  $\delta$  (ppm) 7.69 – 7.62 (m, 2H), 7.43 – 7.37 (m, 1H), 7.36 – 7.32 (m, 2H), 7.31 – 7.27 (m, 2H), 7.25 – 7.21 (m, 1H), 7.20 – 7.16 (m, 2H), 7.14 – 7.07 (m, 1H), 7.01 – 6.95 (m, 1H), 2.77 – 2.70 (m, 2H), 2.47 (s, 3H), 2.46 (s, 3H), 1.68 – 1.60 (m, 2H), 1.39 – 1.31 (m, 2H), 0.91 (t,  $J$  = 7.3 Hz, 3H).

**$^{13}\text{C}$  NMR (101 MHz,  $\text{CDCl}_3$ ):**  $\delta$  (ppm) 159.3, 153.1, 143.9, 138.6, 137.5, 137.4, 129.6, 127.9, 127.0, 126.8, 126.2, 123.8, 122.9, 119.0, 117.9, 111.4, 29.2, 25.8, 22.6, 21.6, 15.8, 13.8.

**HRMS (ESI):**  $\text{C}_{26}\text{H}_{28}\text{NO}_3\text{S}_2$   $[\text{M}+\text{H}]^+$ : calcd.: 466.1505; found: 466.1506.

### ***N*-(4-Methoxyphenyl)-4-Methyl-*N*-(2-Methylbenzofuran-3-yl)-**

#### **Benzenesulfonamide (3j)**

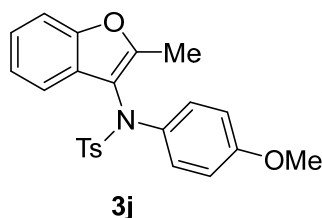

Compound **3j** was synthesized following the general procedure.

A white solid, 72.5 mg, 89% yield.

**m.p.:** 81 °C – 83 °C

**TLC:**  $R_f$  = 0.47 (Hexane/EtOAc = 6:1)

**IR (KBr):** 2926, 1600, 1505, 1348, 1250, 1165, 1089, 1032, 754, 671, 560  $\text{cm}^{-1}$

**$^1\text{H}$  NMR (600 MHz,  $\text{CDCl}_3$ ):**  $\delta$  (ppm) 7.67 – 7.63 (m, 2H), 7.41 – 7.36 (m, 1H), 7.37 – 7.34 (m, 2H), 7.32 – 7.26 (m, 2H), 7.24 – 7.18 (m, 1H), 7.15 – 7.09 (m, 1H), 7.08 – 7.04 (m, 1H), 6.87 – 6.82 (m, 2H), 3.79 (s, 3H), 2.47 (s, 3H), 2.43 (s, 3H).

**$^{13}\text{C}$  NMR (151 MHz,  $\text{CDCl}_3$ ):**  $\delta$  (ppm) 158.7, 155.2, 153.1, 143.8, 137.7, 134.0, 129.6, 128.8, 127.8, 126.3, 123.8, 122.9, 118.9, 118.9, 114.4, 111.3, 55.4, 21.6, 12.0.

HRMS (ESI): C<sub>23</sub>H<sub>22</sub>NO<sub>4</sub>S [M+H]<sup>+</sup>: calcd.: 408.1264; found: 408.1267.

**N-(5-Methoxy-2-Methylbenzofuran-3-yl)-N-(4-Methoxyphenyl)-4-Methyl-**

**Benzenesulfonamide (3k)**

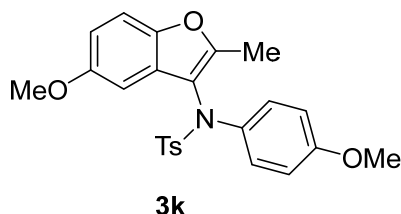

Compound **3k** was synthesized following the general procedure.

A white solid, 76.1 mg, 87% yield.

**m.p.:** 81 °C – 83 °C

**TLC:** *R<sub>f</sub>* = 0.46 (Hexane/EtOAc = 6:1)

**IR (KBr):** 2921, 1604, 1506, 1471, 1353, 1247, 1165, 1030, 803, 662, 565 cm<sup>-1</sup>

**<sup>1</sup>H NMR** (600 MHz, CDCl<sub>3</sub>): δ (ppm) 7.71 – 7.63 (m, 2H), 7.38 – 7.32 (m, 2H), 7.32 – 7.27 (m, 2H), 7.26 (d, *J* = 8.9 Hz, 1H), 6.88 – 6.82 (m, 2H), 6.80 (dd, *J* = 8.9, 2.6 Hz, 1H), 6.44 (d, *J* = 2.6 Hz, 1H), 3.80 (s, 3H), 3.71 (s, 3H), 2.46 (s, 3H), 2.38 (s, 3H).

**<sup>13</sup>C NMR** (151 MHz, CDCl<sub>3</sub>): δ (ppm) 158.6, 156.2, 156.0, 148.0, 143.7, 137.9, 134.1, 129.6, 128.6, 127.9, 126.8, 119.0, 114.4, 112.3, 111.8, 101.5, 55.7, 55.4, 21.5, 12.1.

HRMS (ESI): C<sub>24</sub>H<sub>24</sub>NO<sub>5</sub>S [M+H]<sup>+</sup>: calcd.: 438.1370; found: 438.1373.

**N-(5-Chloro-2-Methylbenzofuran-3-yl)-N-(4-Methoxyphenyl)-4-Methyl-**

**Benzenesulfonamide (3l)**

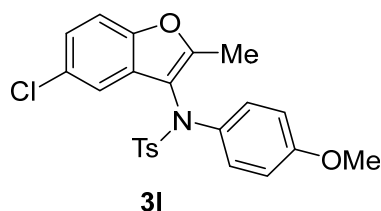

Compound **3l** was synthesized following the general procedure.

A white solid, 72.5 mg, 82% yield.

**m.p.:** 138 °C – 140 °C

**TLC:**  $R_f$  = 0.47 (Hexane/EtOAc = 6:1)

**IR (KBr):** 2918, 1601, 1506, 1451, 1348, 1253, 1163, 1092, 823, 663, 568  $\text{cm}^{-1}$

**$^1\text{H}$  NMR** (600 MHz,  $\text{CDCl}_3$ ):  $\delta$  (ppm) 7.63 – 7.59 (m, 2H), 7.35 – 7.26 (m, 5H), 7.15 (dd,  $J$  = 8.7, 2.2 Hz, 1H), 6.90 – 6.84 (m, 2H), 6.68 (d,  $J$  = 2.2 Hz, 1H), 3.81 (s, 3H), 2.50 (s, 3H), 2.44 (s, 3H).

**$^{13}\text{C}$  NMR** (151 MHz,  $\text{CDCl}_3$ ):  $\delta$  (ppm) 158.8, 157.2, 151.4, 144.3, 137.4, 133.8, 129.7, 128.7, 127.9, 127.5, 123.9, 118.5, 118.5, 114.8, 114.5, 112.3, 55.4, 21.6, 12.1.

**HRMS (ESI):**  $\text{C}_{23}\text{H}_{21}^{35}\text{ClNO}_4\text{S}$   $[\text{M}+\text{H}]^+$ : calcd.: 442.0874; found: 442.0880.

***N*-(5-Fluoro-2-Methylbenzofuran-3-yl)-*N*-(4-Methoxyphenyl)-4-Methylbenzenesulfonamide (3m)**

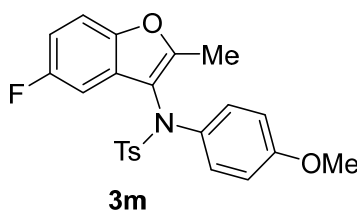

Compound **3m** was synthesized following the general procedure.

A colorless oil, 72.3 mg, 85% yield.

**m.p.:** 131 °C – 133 °C

**TLC:**  $R_f$  = 0.45 (Hexane/EtOAc = 6:1)

**IR (KBr):** 2928, 1602, 1506, 1469, 1345, 1245, 1165, 1100, 1031, 825, 665, 568  $\text{cm}^{-1}$

**$^1\text{H}$  NMR** (600 MHz,  $\text{CDCl}_3$ ):  $\delta$  (ppm) 7.67 – 7.61 (m, 2H), 7.34 – 7.27 (m, 5H), 6.92 (td,  $J$  = 9.0, 2.6 Hz, 1H), 6.88 – 6.83 (m, 2H), 6.62 (dd,  $J$  = 8.5, 2.6 Hz, 1H), 3.80 (s, 3H), 2.48 (s, 3H), 2.42 (s, 3H).

**$^{13}\text{C}$  NMR** (151 MHz,  $\text{CDCl}_3$ ):  $\delta$  (ppm) 159.2 (d,  $J$  = 238.9 Hz), 158.8, 157.3, 149.2, 144.1, 137.5, 133.8, 129.7, 128.8, 127.8, 127.1 (d,  $J$  = 10.2 Hz), 119.2 (d,  $J$  = 3.7 Hz), 114.5, 112.1 (d,  $J$  = 9.6 Hz), 111.4 (d,  $J$  = 26.4 Hz), 104.6 (d,  $J$  = 26.3 Hz), 55.4, 21.6, 12.2.

**HRMS (ESI):**  $\text{C}_{23}\text{H}_{21}\text{FNO}_4\text{S}$   $[\text{M}+\text{H}]^+$ : calcd.: 426.1170; found: 426.1174.

**N-(4-Methoxyphenyl)-4-Methyl-N-(2-Phenylbenzofuran-3-yl)-**

**Benzenesulfonamide (3n)**

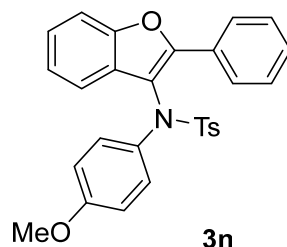

Compound **3n** was synthesized following the general procedure.

A white solid, 62.0 mg, 66% yield.

**m.p.:** 120 °C – 122 °C

**TLC:**  $R_f$  = 0.47 (Hexane/EtOAc = 6:1)

**IR (KBr):** 2922, 1598, 1507, 1358, 1251, 1164, 1019, 817, 749, 665, 556  $\text{cm}^{-1}$

**$^1\text{H}$  NMR** (400 MHz,  $\text{CDCl}_3$ ):  $\delta$  (ppm) 8.16 – 8.06 (m, 2H), 7.67 – 7.60 (m, 2H), 7.55 – 7.47 (m, 1H), 7.49 – 7.37 (m, 5H), 7.33 – 7.29 (m, 1H), 7.26 – 7.21 (m, 2H), 7.19 – 7.10 (m, 1H), 7.04 – 6.97 (m, 1H), 6.82 – 6.74 (m, 2H), 3.76 (s, 3H), 2.46 (s, 3H).

**$^{13}\text{C}$  NMR** (101 MHz,  $\text{CDCl}_3$ ):  $\delta$  (ppm) 158.4, 153.1, 152.9, 144.0, 137.3, 134.0, 129.4, 129.3, 128.9, 128.5, 128.2, 127.6, 127.4, 126.8, 124.8, 123.1, 120.2, 118.5, 114.3, 111.7, 55.3, 21.6.

**HRMS (ESI):**  $\text{C}_{28}\text{H}_{24}\text{NO}_4\text{S}$   $[\text{M}+\text{H}]^+$ : calcd.: 470.1421; found: 470.1425.

**N-(4-Methoxyphenyl)-4-Methyl-N-(2-(p-Tolyl)-Benzofuran-3-yl)-**

**Benzenesulfonamide (3o)**

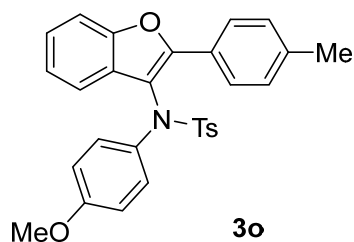

Compound **3o** was synthesized following the general procedure.

A white solid, 67.7 mg, 70% yield.



**m.p.:** 109 °C – 111 °C

**TLC:**  $R_f$  = 0.45 (Hexane/EtOAc = 6:1)

**IR (KBr):** 2920, 1600, 1505, 1449, 1351, 1251, 1166, 1028, 816, 745, 670, 555  $\text{cm}^{-1}$

**$^1\text{H}$  NMR** (400 MHz,  $\text{CDCl}_3$ ):  $\delta$  (ppm) 8.06 – 7.97 (m, 2H), 7.68 – 7.59 (m, 2H), 7.52 – 7.46 (m, 1H), 7.42 – 7.36 (m, 2H), 7.32 – 7.24 (m, 5H), 7.15 – 7.08 (m, 1H), 7.00 – 6.93 (m, 1H), 6.84 – 6.73 (m, 2H), 3.76 (s, 3H), 2.47 (s, 3H), 2.43 (s, 3H).

**$^{13}\text{C}$  NMR** (101 MHz,  $\text{CDCl}_3$ ):  $\delta$  (ppm) 158.4, 153.4, 152.8, 143.9, 139.5, 137.4, 134.1, 129.4, 129.2, 128.2, 127.6, 127.4, 126.7, 126.1, 124.6, 123.0, 120.0, 117.9, 114.3, 111.7, 55.3, 21.6, 21.4.

**HRMS (ESI):**  $\text{C}_{29}\text{H}_{26}\text{NO}_4\text{S}$   $[\text{M}+\text{H}]^+$ : calcd.: 484.1577; found: 484.1582.

### *N*-(2-(4-Chlorophenyl)-Benzofuran-3-yl)-*N*-(4-Methoxyphenyl)-4-Methyl-

#### Benzenesulfonamide (3p)

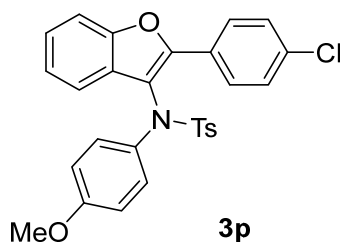

Compound **3p** was synthesized following the general procedure.

A white solid, 73.6 mg, 73% yield.

**m.p.:** 96 °C – 98 °C

**TLC:**  $R_f$  = 0.44 (Hexane/EtOAc = 6:1)

**IR (KBr):** 2924, 1601, 1507, 1448, 1354, 1255, 1165, 1092, 1030, 831, 744, 670  $\text{cm}^{-1}$

**$^1\text{H}$  NMR** (400 MHz,  $\text{CDCl}_3$ ):  $\delta$  (ppm) 8.13 – 8.03 (m, 2H), 7.67 – 7.60 (m, 2H), 7.53 – 7.47 (m, 1H), 7.46 – 7.41 (m, 2H), 7.40 – 7.35 (m, 2H), 7.34 – 7.29 (m, 1H), 7.27 – 7.24 (m, 2H), 7.17 – 7.10 (m, 1H), 7.01 – 6.95 (m, 1H), 6.82 – 6.75 (m, 2H), 3.76 (s, 3H), 2.48 (s, 3H).

**$^{13}\text{C}$  NMR** (101 MHz,  $\text{CDCl}_3$ ):  $\delta$  (ppm) 158.5, 152.9, 152.0, 144.2, 137.2, 135.3, 133.8, 129.5, 128.8, 128.2, 128.0, 127.5, 127.4, 127.2, 125.1, 123.3, 120.2, 118.9, 114.4, 111.8, 55.4, 21.6.

HRMS (ESI): C<sub>28</sub>H<sub>23</sub><sup>35</sup>CINO<sub>4</sub>S [M+H]<sup>+</sup>: calcd.: 504.1031; found: 504.1035.

**N-(2-(4-Fluorophenyl)-Benzofuran-3-yl)-N-(4-Methoxyphenyl)-4-Methyl-**

**Benzenesulfonamide (3q)**

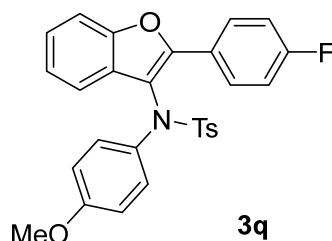

Compound **3q** was synthesized following the general procedure.

A white solid, 62.4 mg, 64% yield.

**m.p.:** 142 °C – 144 °C

**TLC:** R<sub>f</sub> = 0.45 (Hexane/EtOAc = 6:1)

**IR (KBr):** 2922, 1601, 1504, 1450, 1353, 1229, 1163, 1094, 747, 671, 588, 545 cm<sup>-1</sup>

**<sup>1</sup>H NMR** (400 MHz, CDCl<sub>3</sub>): δ (ppm) 8.15 – 8.04 (m, 2H), 7.60 (d, *J* = 7.9 Hz, 2H), 7.47 (d, *J* = 8.2 Hz, 1H), 7.34 (d, *J* = 8.6 Hz, 2H), 7.28 – 7.20 (m, 2H), 7.17 – 7.06 (m, 3H), 6.91 (d, *J* = 7.8 Hz, 1H), 6.76 (d, *J* = 8.9 Hz, 2H), 3.73 (s, 3H), 2.44 (s, 3H).

**<sup>13</sup>C NMR** (101 MHz, CDCl<sub>3</sub>): δ (ppm) 163.2 (d, *J* = 250.2 Hz), 158.5, 152.9, 152.3, 144.2, 137.2, 133.9, 129.5, 128.9 (d, *J* = 8.4 Hz), 128.2, 127.5, 127.2, 125.2 (d, *J* = 3.4 Hz), 124.9, 123.2, 120.1, 118.3, 115.7 (d, *J* = 21.9 Hz), 114.4, 111.7, 55.4, 21.6.

HRMS (ESI): C<sub>28</sub>H<sub>23</sub>FNO<sub>4</sub>S [M+H]<sup>+</sup>: calcd.: 488.1326; found: 488.1331.

**N-(2-(4-Cyanophenyl)-Benzofuran-3-yl)-N-(4-Methoxyphenyl)-4-Methyl-**

**Benzenesulfonamide (3r)**

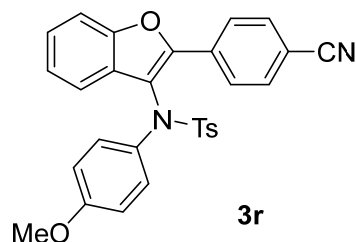

Compound **3r** was synthesized following the general procedure.

A colorless oil, 65.3 mg, 66% yield.

**m.p.:** 188 °C – 190 °C

**TLC:**  $R_f$  = 0.67 (Hexane/EtOAc = 6:1)

**IR (KBr):** 2922, 2222, 1604, 1507, 1353, 1255, 1163, 1091, 743, 671, 546  $\text{cm}^{-1}$

**$^1\text{H}$  NMR (600 MHz,  $\text{CDCl}_3$ ):**  $\delta$  (ppm) 8.31 – 8.24 (m, 2H), 7.80 – 7.71 (m, 2H), 7.67 – 7.60 (m, 2H), 7.53 (d,  $J$  = 8.1 Hz, 1H), 7.45 – 7.33 (m, 3H), 7.31 – 7.24 (m, 2H), 7.22 – 7.13 (m, 1H), 7.01 – 6.95 (m, 1H), 6.86 – 6.70 (m, 2H), 3.77 (s, 3H), 2.49 (s, 3H).

**$^{13}\text{C}$  NMR (151 MHz,  $\text{CDCl}_3$ ):**  $\delta$  (ppm) 158.6, 153.3, 150.6, 144.5, 137.0, 133.5, 133.0, 132.3, 129.6, 128.2, 127.4, 126.9, 126.0, 123.6, 121.1, 120.6, 118.6, 114.5, 112.3, 112.0, 55.4, 21.6.

**HRMS (ESI):**  $\text{C}_{29}\text{H}_{23}\text{N}_2\text{O}_4\text{S}$   $[\text{M}+\text{H}]^+$ : calcd.: 495.1373; found: 495.1374.

***N*-(2-(4-Acetylphenyl)-Benzofuran-3-yl)-*N*-(4-Methoxyphenyl)-4-Methylbenzenesulfonamide (3s)**

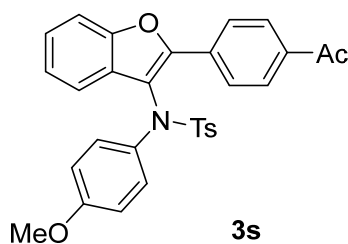

Compound **3s** was synthesized following the general procedure.

A colorless oil, 67.5 mg, 66% yield.

**TLC:**  $R_f$  = 0.40 (Hexane/EtOAc = 6:1)

**IR (KBr):** 2921, 1679, 1603, 1507, 1351, 1254, 1161, 1089, 1031, 753, 668, 589  $\text{cm}^{-1}$

**$^1\text{H}$  NMR (600 MHz,  $\text{CDCl}_3$ ):**  $\delta$  (ppm) 8.30 – 8.22 (m, 2H), 8.10 – 8.03 (m, 2H), 7.69 – 7.61 (m, 2H), 7.56 – 7.51 (m, 1H), 7.46 – 7.24 (m, 5H), 7.20 – 7.13 (m, 1H), 7.06 – 7.00 (m, 1H), 6.86 – 6.72 (m, 2H), 3.76 (s, 3H), 2.67 (s, 3H), 2.47 (s, 3H).

**$^{13}\text{C}$  NMR (151 MHz,  $\text{CDCl}_3$ ):**  $\delta$  (ppm) 197.5, 158.6, 153.2, 151.6, 144.3, 137.1, 137.0, 133.7, 133.1, 129.6, 128.5, 128.2, 127.5, 127.2, 126.6, 125.6, 123.5, 120.5, 120.4, 114.4, 112.0, 55.4, 26.7, 21.6.

**HRMS (ESI):**  $\text{C}_{30}\text{H}_{26}\text{NO}_5\text{S}$   $[\text{M}+\text{H}]^+$ : calcd.: 512.1526; found: 512.1529.

**N-(4-Methoxyphenyl)-4-Methyl-N-(2-(4-(Trifluoromethyl)-Phenyl)-**

**Benzofuran-3-yl)-Benzenesulfonamide (3t)**

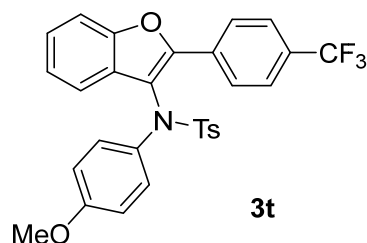

Compound **3t** was synthesized following the general procedure.

A white solid, 66.6 mg, 62% yield.

**m.p.:** 175 °C – 177 °C

**TLC:**  $R_f$  = 0.42 (Hexane/EtOAc = 6:1)

**IR (KBr):** 2923, 1612, 1508, 1356, 1323, 1162, 1111, 1032, 745, 668, 543  $\text{cm}^{-1}$

**$^1\text{H}$  NMR** (400 MHz,  $\text{CDCl}_3$ ):  $\delta$  (ppm) 8.27 – 8.17 (m, 2H), 7.73 – 7.66 (m, 2H), 7.62 – 7.56 (m, 2H), 7.54 – 7.47 (m, 1H), 7.42 – 7.27 (m, 3H), 7.24 – 7.18 (m, 2H), 7.14 (t,  $J$  = 7.5 Hz, 1H), 7.04 – 6.95 (m, 1H), 6.78 (d,  $J$  = 8.6 Hz, 2H), 3.73 (s, 3H), 2.42 (s, 3H).

**$^{13}\text{C}$  NMR** (151 MHz,  $\text{CDCl}_3$ ):  $\delta$  (ppm) 158.5, 153.2, 151.2, 144.3, 137.0, 133.7, 132.2, 130.7(q,  $J$  = 32.7 Hz), 129.5, 128.1, 127.3, 127.1, 126.8, 125.6, 125.5(q,  $J$  = 3.8 Hz), 123.5, 120.5, 114.5, 112.0, 55.4, 21.5.

**HRMS (ESI):**  $\text{C}_{29}\text{H}_{23}\text{F}_3\text{NO}_4\text{S}$   $[\text{M}+\text{H}]^+$ : calcd.: 538.1294; found: 538.1297.

**N-(4-Methoxyphenyl)-4-Methyl-N-(3-Phenylbenzofuran-2-yl)-**

**Benzenesulfonamide (3u)**

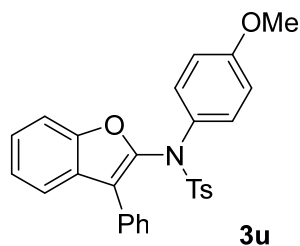

Compound **3u** was synthesized following the general procedure.

A white solid, 72.3 mg, 77% yield.

**m.p.:** 112 °C – 114 °C

**TLC:**  $R_f$  = 0.47 (Hexane/EtOAc = 6:1)

**IR (KBr):** 2922, 1621, 1507, 1453, 1356, 1253, 1165, 1032, 749, 667, 551  $\text{cm}^{-1}$

**$^1\text{H}$  NMR** (600 MHz,  $\text{CDCl}_3$ ):  $\delta$  (ppm) 7.79 – 7.74 (m, 2H), 7.69 (d,  $J$  = 7.7 Hz, 1H), 7.67–7.65 (m, 2H), 7.56 – 7.52 (m, 2H), 7.49 (d,  $J$  = 8.2 Hz, 1H), 7.47 – 7.43 (m, 1H), 7.42 – 7.38 (m, 1H), 7.32 – 7.27 (m, 3H), 7.17 – 7.12 (m, 2H), 6.76 – 6.72 (m, 2H), 3.76 (s, 3H), 2.49 (s, 3H).

**$^{13}\text{C}$  NMR** (151 MHz,  $\text{CDCl}_3$ ):  $\delta$  (ppm) 159.3, 152.0, 144.5, 144.1, 135.6, 131.9, 130.6, 129.7, 129.3, 129.0, 128.7, 128.6, 127.9, 127.7, 125.5, 123.1, 120.9, 117.9, 114.2, 111.4, 55.3, 21.7.

**HRMS (ESI):**  $\text{C}_{28}\text{H}_{24}\text{NO}_4\text{S}$   $[\text{M}+\text{H}]^+$ : calcd.: 470.1421; found: 470.1426.

***N*-(3-([1,1'-Biphenyl]-4-yl)-Benzofuran-2-yl)-*N*-(4-Methoxyphenyl)-4-**

**Methyl-Benzenesulfonamide (3v)**

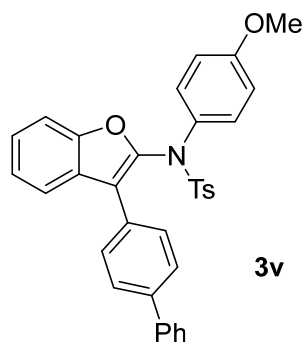

Compound **3v** was synthesized following the general procedure.

A white solid, 69.8 mg, 64% yield

**m.p.:** 162 °C – 164 °C

**TLC:**  $R_f$  = 0.44 (Hexane/EtOAc = 6:1)

**IR (KBr):** 2921, 1600, 1505, 1446, 1360, 1251, 1161, 841, 725, 668, 555  $\text{cm}^{-1}$

**$^1\text{H}$  NMR** (400 MHz,  $\text{CDCl}_3$ ):  $\delta$  (ppm) 7.84 – 7.78 (m, 2H), 7.77 – 7.66 (m, 5H), 7.65 – 7.58 (m, 2H), 7.54 – 7.43 (m, 3H), 7.43 – 7.34 (m, 3H), 7.33 – 7.25 (m, 2H), 7.19 – 7.12 (m, 2H), 6.75 – 6.66 (m, 2H), 3.72 (s, 3H), 2.43 (s, 3H).

$^{13}\text{C}$  NMR (101 MHz,  $\text{CDCl}_3$ ):  $\delta$  (ppm) 159.3, 152.1, 144.5, 144.1, 140.7, 140.5, 135.7, 132.0, 129.7, 129.3, 128.8, 128.6, 127.3, 127.0, 125.5, 123.2, 121.0, 117.6, 114.2, 111.4, 55.3, 21.6.

HRMS (ESI):  $\text{C}_{34}\text{H}_{28}\text{NO}_4\text{S}$   $[\text{M}+\text{H}]^+$ : calcd.: 546.1734; found: 546.1737.

***N*-(4-Methoxyphenyl)-4-Methyl-*N*-(2-Phenylbenzo[*b*]thiophen-3-yl)-**

**Benzenesulfonamide (5a)**

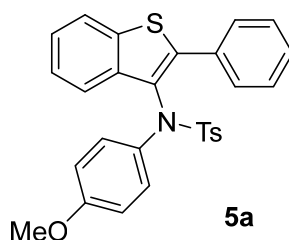

Compound **5a** was synthesized following the general procedure.

A white solid, 71.9 mg, 74% yield.

**m.p.:** 155 °C – 157 °C

**TLC:**  $R_f$  = 0.50 (Hexane/EtOAc = 6:1)

**IR (KBr):** 2928, 1509, 1354, 1252, 1162, 1091, 1027, 923, 815, 766, 656, 560  $\text{cm}^{-1}$

**$^1\text{H}$  NMR** (600 MHz,  $\text{CDCl}_3$ ):  $\delta$  (ppm) 7.85 – 7.78 (m, 1H), 7.70 – 7.59 (m, 3H), 7.58 – 7.51 (m, 2H), 7.49 – 7.33 (m, 5H), 7.23 – 7.15 (m, 2H), 7.12 – 7.01 (m, 2H), 6.75 – 6.66 (m, 2H), 3.74 (s, 3H), 2.44 (s, 3H).

**$^{13}\text{C}$  NMR** (151 MHz,  $\text{CDCl}_3$ ):  $\delta$  (ppm) 158.0, 143.7, 143.4, 137.8, 137.5, 136.6, 134.1, 132.4, 129.7, 129.2, 128.9, 128.9, 128.4, 128.0, 127.3, 124.8, 124.8, 123.0, 122.5, 114.1, 55.3, 21.6.

HRMS (ESI):  $\text{C}_{28}\text{H}_{24}\text{NO}_3\text{S}_2$   $[\text{M}+\text{H}]^+$ : calcd.: 486.1192; found: 486.1197.

***N*-(4-Methoxyphenyl)-4-Methyl-*N*-(3-Methylbenzo[*b*]thiophen-2-yl)-**

**Benzenesulfonamide (5b)**

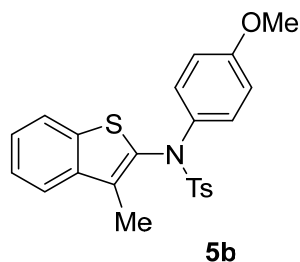

Compound **5b** was synthesized following the general procedure.

A white solid, 77.1 mg, 91% yield.

**m.p.:** 91 °C – 93 °C

**TLC:**  $R_f$  = 0.68 (Hexane/EtOAc = 6:1)

**IR (KBr):** 2925, 1506, 1349, 1245, 1162, 1086, 951, 753, 665, 615, 568  $\text{cm}^{-1}$

**$^1\text{H}$  NMR** (600 MHz,  $\text{CDCl}_3$ ):  $\delta$  (ppm) 7.72 – 7.66 (m, 4H), 7.41 – 7.35 (m, 2H), 7.34 – 7.31 (m, 4H), 6.90 – 6.85 (m, 2H), 3.80 (s, 3H), 2.49 (s, 3H), 2.49 (s, 3H).

**$^{13}\text{C}$  NMR** (151 MHz,  $\text{CDCl}_3$ ):  $\delta$  (ppm) 159.1, 144.1, 137.9, 137.6, 136.7, 135.8, 133.4, 132.4, 129.9, 129.5, 128.6, 125.4, 124.3, 122.8, 122.3, 114.4, 55.4, 21.7, 11.8.

**HRMS (ESI):**  $\text{C}_{23}\text{H}_{22}\text{NO}_3\text{S}_2$   $[\text{M}+\text{H}]^+$ : calcd.: 424.1036; found: 424.1040.

### ***N*-(6-Chloro-3-Methylbenzo[*b*]thiophen-2-yl)-*N*-(4-Methoxyphenyl)-4-**

#### **Methyl-Benzenesulfonamide (5c)**

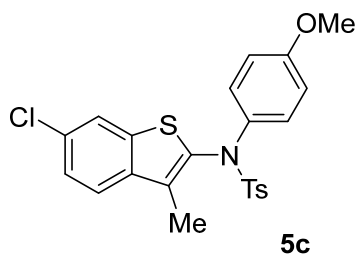

Compound **5c** was synthesized following the general procedure.

A white solid, 80.6 mg, 88% yield.

**m.p.:** 146 °C – 148 °C

**TLC:**  $R_f$  = 0.51 (Hexane/EtOAc = 6:1)

**IR (KBr):** 2921, 1599, 1507, 1355, 1250, 1165, 1083, 1035, 667, 576  $\text{cm}^{-1}$

**$^1\text{H}$  NMR** (600 MHz,  $\text{CDCl}_3$ ):  $\delta$  (ppm) 7.69 – 7.63 (m, 3H), 7.62 – 7.57 (m, 1H), 7.37 – 7.26 (m, 5H), 6.91 – 6.83 (m, 2H), 3.80 (s, 3H), 2.49 (s, 3H), 2.43 (s, 3H).

$^{13}\text{C}$  NMR (151 MHz,  $\text{CDCl}_3$ ):  $\delta$  (ppm) 159.2, 144.2, 139.1, 138.5, 135.7, 135.5, 133.2, 131.8, 130.6, 129.9, 129.5, 128.6, 125.8, 123.5, 122.5, 114.5, 55.4, 21.7, 11.8.

HRMS (ESI):  $\text{C}_{23}\text{H}_{21}^{35}\text{ClNO}_3\text{S}_2$   $[\text{M}+\text{H}]^+$ : calcd.: 458.0646; found: 458.0647.

***N*-(Benzo[b]thiophen-3-yl)-*N*-(4-Methoxyphenyl)-4-Methyl-**

**Benzenesulfonamide (5d)**

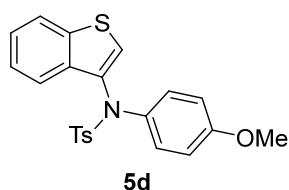

Compound **5d** was synthesized following the general procedure.

A colorless oil, 31.9 mg, 39% yield.

TLC:  $R_f$  = 0.52 (Hexane/EtOAc = 6:1)

IR (KBr): 2923, 1600, 1505, 1352, 1253, 1163, 1088, 1030, 807, 759, 663, 560  $\text{cm}^{-1}$

$^1\text{H}$  NMR (600 MHz,  $\text{CDCl}_3$ ):  $\delta$  (ppm) 7.92–7.90 (m, 1H), 7.86–7.83 (m, 1H), 7.67–7.65 (m, 1H), 7.48 – 7.43 (m, 3H), 7.33 – 7.30 (m, 1H), 7.05 – 7.01 (m, 2H), 6.94–6.92 (m, 2H), 6.59–6.57 (m, 2H), 3.69 (s, 3H), 2.34 (s, 3H).

$^{13}\text{C}$  NMR (151 MHz,  $\text{CDCl}_3$ ):  $\delta$  (ppm) 158.0, 143.5, 139.5, 138.8, 137.4, 137.3, 134.2, 129.2, 127.8, 127.7, 125.1, 124.9, 124.6, 123.1, 122.4, 114.0, 55.3, 21.5.

HRMS (ESI):  $\text{C}_{22}\text{H}_{20}\text{NO}_3\text{S}_2$   $[\text{M}+\text{H}]^+$ : calcd.: 410.0879; found: 410.0883.

***N*-(Benzo[b]thiophen-2-yl)-*N*-(4-Methoxyphenyl)-4-Methyl-**

**Benzenesulfonamide (5d')**

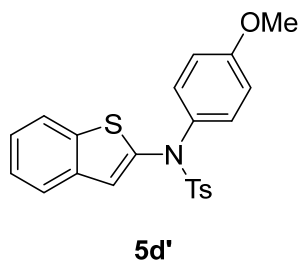

Compound **5d'** was synthesized following the general procedure.



A white solid, 39.3 mg, 48% yield.

**m.p.:** 103 °C – 105 °C

**TLC:**  $R_f$  = 0.51 (Hexane/EtOAc = 6:1)

**IR (KBr):** 2920, 1600, 1507, 1350, 1255, 1231, 1165, 1028, 760, 662, 552  $\text{cm}^{-1}$

**$^1\text{H}$  NMR** (400 MHz,  $\text{CDCl}_3$ ):  $\delta$  (ppm) 7.88 – 7.84 (m, 1H), 7.81 – 7.76 (m, 1H), 7.68 – 7.61 (m, 2H), 7.41 – 7.33 (m, 4H), 7.32 – 7.27 (m, 3H), 6.89 – 6.82 (m, 2H), 3.79 (s, 3H), 2.46 (s, 3H).

**$^{13}\text{C}$  NMR** (101 MHz,  $\text{CDCl}_3$ ):  $\delta$  (ppm) 158.8, 143.8, 137.9, 136.7, 136.3, 133.6, 133.1, 129.5, 129.5, 128.0, 125.1, 124.7, 123.8, 122.8, 122.0, 114.3, 55.4, 21.6.

**HRMS (ESI):**  $\text{C}_{22}\text{H}_{20}\text{NO}_3\text{S}_2$   $[\text{M}+\text{H}]^+$ : calcd.: 410.0879; found: 410.0882.

### ***N,N*-Bis(4-Methoxyphenyl)-4-Methyl-Benzenesulfonamide (7a)**

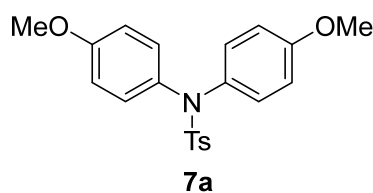

Compound **7a** was synthesized following the general procedure.

A white solid, 67.5 mg, 88% yield.

**m.p.:** 117 °C – 119 °C

**TLC:**  $R_f$  = 0.49 (Hexane/EtOAc = 6:1)

**IR (KBr):** 2933, 1601, 1504, 1350, 1299, 1244, 1158, 1031, 674, 575, 546  $\text{cm}^{-1}$

**$^1\text{H}$  NMR** (400 MHz,  $\text{CDCl}_3$ ):  $\delta$  (ppm) 7.65 – 7.54 (m, 2H), 7.33 – 7.27 (m, 2H), 7.25 – 7.17 (m, 4H), 6.88 – 6.80 (m, 4H), 3.80 (s, 6H), 2.47 (s, 3H).

**$^{13}\text{C}$  NMR** (101 MHz,  $\text{CDCl}_3$ ):  $\delta$  (ppm) 158.7, 143.3, 137.5, 134.5, 129.7, 129.4, 127.8, 114.4, 55.4, 21.6.

**HRMS (ESI):**  $\text{C}_{21}\text{H}_{22}\text{NO}_4\text{S}$   $[\text{M}+\text{H}]^+$ : calcd.: 384.1264; found: 384.1267.

### ***N*-(4-Methoxy-3,5-Dimethylphenyl)-*N*-(4-Methoxyphenyl)-4-Methyl-Benzenesulfonamide (7b)**

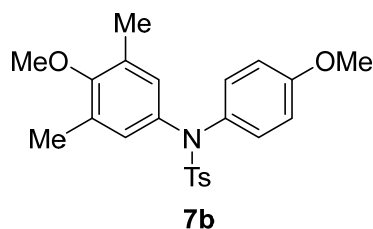

Compound **7b** was synthesized following the general procedure.

A white solid, 69.1 mg, 84% yield.

**m.p.:** 153 °C – 155 °C

**TLC:**  $R_f$  = 0.51 (Hexane/EtOAc = 6:1)

**IR (KBr):** 2948, 1599, 1508, 1347, 1239, 1166, 1093, 1033, 1010, 819, 660, 541  $\text{cm}^{-1}$

**$^1\text{H}$  NMR** (400 MHz,  $\text{CDCl}_3$ ):  $\delta$  (ppm) 7.63 – 7.57 (m, 2H), 7.29 (d,  $J$  = 7.8 Hz, 2H), 7.23 – 7.17 (m, 2H), 6.93 (s, 2H), 6.87 – 6.80 (m, 2H), 3.79 (s, 3H), 3.70 (s, 3H), 2.46 (s, 3H), 2.23 (s, 6H).

**$^{13}\text{C}$  NMR** (101 MHz,  $\text{CDCl}_3$ ):  $\delta$  (ppm) 158.8, 156.1, 143.3, 137.6, 137.0, 134.2, 131.7, 130.0, 129.3, 128.4, 127.8, 114.3, 59.6, 55.4, 21.6, 16.2.

**HRMS (ESI):**  $\text{C}_{23}\text{H}_{26}\text{NO}_4\text{S}$   $[\text{M}+\text{H}]^+$ : calcd.: 412.1577; found: 412.1579.

### ***N*-(4-Methoxy-2,3-Dimethylphenyl)-*N*-(4-Methoxyphenyl)-4-Methyl-**

#### **Benzenesulfonamide (7c)**

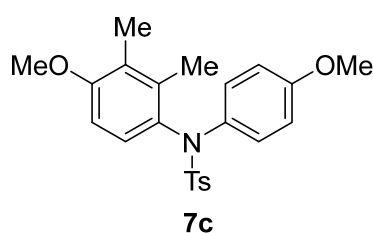

Compound **7c** was synthesized following the general procedure.

A white solid, 70.8 mg, 86% yield.

**m.p.:** 139 °C – 141 °C

**TLC:**  $R_f$  = 0.50 (Hexane/EtOAc = 6:1)

**IR (KBr):** 2924, 1587, 1506, 1481, 1348, 1255, 1164, 1106, 1033, 669, 562  $\text{cm}^{-1}$

$^1\text{H}$  NMR (400 MHz,  $\text{CDCl}_3$ ):  $\delta$  (ppm) 7.62 – 7.54 (m, 2H), 7.33 – 7.26 (m, 4H), 6.92 – 6.79 (m, 3H), 6.64 (d,  $J = 8.7$  Hz, 1H), 3.81 (s, 3H), 3.79 (s, 3H), 2.47 (s, 3H), 2.36 (s, 3H), 2.15 (s, 3H).

$^{13}\text{C}$  NMR (101 MHz,  $\text{CDCl}_3$ ):  $\delta$  (ppm) 158.1, 157.2, 143.2, 138.7, 137.6, 134.2, 132.9, 129.3, 128.9, 127.9, 126.8, 126.7, 114.1, 107.5, 55.5, 55.4, 21.6, 15.4, 12.4.

HRMS (ESI):  $\text{C}_{23}\text{H}_{26}\text{NO}_4\text{S}$   $[\text{M}+\text{H}]^+$ : calcd.: 412.1577; found: 412.1581.

### *N*-(3-Chloro-4-Methoxyphenyl)-*N*-(4-Methoxyphenyl)-4-Methyl-

#### Benzenesulfonamide (7d)

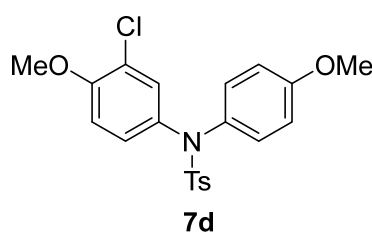

Compound **7d** was synthesized following the general procedure.

A white solid, 64.3 mg, 77% yield.

**m.p.:** 135 °C – 137 °C

**TLC:**  $R_f = 0.51$  (Hexane/EtOAc = 6:1)

**IR (KBr):** 2919, 1598, 1504, 1348, 1298, 1260, 1165, 1091, 1021, 665, 588, 543  $\text{cm}^{-1}$

$^1\text{H}$  NMR (400 MHz,  $\text{CDCl}_3$ ):  $\delta$  (ppm) 7.61 – 7.54 (m, 2H), 7.33 – 7.25 (m, 3H), 7.24 – 7.15 (m, 3H), 6.90 – 6.78 (m, 3H), 3.89 (s, 3H), 3.80 (s, 3H), 2.47 (s, 3H).

$^{13}\text{C}$  NMR (101 MHz,  $\text{CDCl}_3$ ):  $\delta$  (ppm) 158.9, 154.2, 143.6, 137.1, 134.8, 133.9, 130.0, 129.9, 129.5, 127.8, 127.8, 122.4, 114.5, 111.9, 56.3, 55.4, 21.6.

HRMS (ESI):  $\text{C}_{21}\text{H}_{21}^{35}\text{ClNO}_4\text{S}$   $[\text{M}+\text{H}]^+$ : calcd.: 418.0874; found: 418.0877.

### *N*-(2-Bromo-4-Methoxyphenyl)-*N*-(4-Methoxyphenyl)-4-Methyl-

#### Benzenesulfonamide (7e)

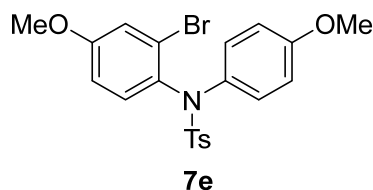

Compound **7e** was synthesized following the general procedure.

A white solid, 83.2 mg, 90% yield.

**m.p.:** 82 °C – 84 °C

**TLC:**  $R_f$  = 0.49 (Hexane/EtOAc = 6:1)

**IR (KBr):** 2921, 1596, 1507, 1485, 1353, 1160, 1034, 974, 670, 557  $\text{cm}^{-1}$

**$^1\text{H}$  NMR** (400 MHz,  $\text{CDCl}_3$ ):  $\delta$  (ppm) 7.62 – 7.54 (m, 2H), 7.33 (d,  $J$  = 8.5 Hz, 2H), 7.28 – 7.18 (m, 3H), 7.16 – 7.09 (m, 1H), 6.85 – 6.71 (m, 3H), 3.75 (s, 3H), 3.75 (s, 3H), 2.42 (s, 3H).

**$^{13}\text{C}$  NMR** (101 MHz,  $\text{CDCl}_3$ ):  $\delta$  (ppm) 159.6, 158.7, 143.6, 137.0, 133.1, 132.8, 131.3, 130.0, 129.4, 128.1, 126.5, 118.9, 114.1, 113.9, 55.7, 55.4, 21.6.

**HRMS (ESI):**  $\text{C}_{21}\text{H}_{21}^{79}\text{BrNO}_4\text{S}$   $[\text{M}+\text{H}]^+$ : calcd.: 462.0369; found: 462.0371;

$\text{C}_{21}\text{H}_{21}^{81}\text{BrNO}_4\text{S}$   $[\text{M}+\text{H}]^+$ : calcd.: 464.0349; found: 464.0350.

### ***N*-(4-Methoxyphenyl)-4-Methyl-*N*-(4-Methylthio)-Phenyl-**

#### **Benzenesulfonamide (7f)**

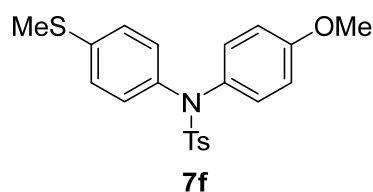

Compound **7f** was synthesized following the general procedure.

A white solid, 72.7 mg, 91% yield.

**m.p.:** 111 °C – 113 °C

**TLC:**  $R_f$  = 0.48 (Hexane/EtOAc = 6:1)

**IR (KBr):** 2924, 1599, 1505, 1349, 1249, 1164, 1093, 1026, 982, 720, 664, 575  $\text{cm}^{-1}$

**$^1\text{H}$  NMR** (400 MHz,  $\text{CDCl}_3$ ):  $\delta$  (ppm) 7.63 – 7.55 (m, 2H), 7.32 – 7.25 (m, 2H), 7.24 – 7.14 (m, 6H), 6.89 – 6.80 (m, 2H), 3.80 (s, 3H), 2.46 (s, 3H), 2.46 (s, 3H).

$^{13}\text{C}$  NMR (101 MHz,  $\text{CDCl}_3$ ):  $\delta$  (ppm) 158.9, 143.5, 138.9, 137.7, 137.4, 134.0, 130.0, 129.5, 128.2, 127.8, 127.0, 114.4, 55.4, 21.6, 15.7.

HRMS (ESI):  $\text{C}_{21}\text{H}_{22}\text{NO}_3\text{S}_2$   $[\text{M}+\text{H}]^+$ : calcd.: 400.1036; found: 400.1040.

### 5-Methoxy-2,2-diphenyl-1-tosylindoline (8)

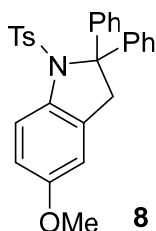

$^1\text{H}$  NMR (400 MHz,  $\text{CDCl}_3$ ):  $\delta$  (ppm) 7.77 (d,  $J = 9.0$  Hz, 1H), 7.45 – 7.38 (m, 4H), 7.28 – 7.22 (m, 6H), 6.94 – 6.84 (m, 4H), 6.80 (dd,  $J = 9.0, 2.7$  Hz, 1H), 6.62 (d,  $J = 2.6$  Hz, 1H), 3.81 (s, 2H), 3.75 (s, 3H), 2.29 (s, 3H).

### N-(2-Methoxy-5-(4-Methylphenyl)-Sulfonamido-Phenyl)-N-(4-Methoxyphenyl)-4-Methyl-Benzenesulfonamide (9)

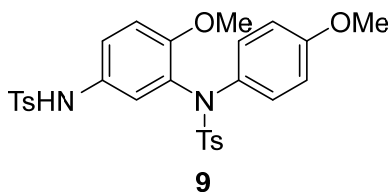

A white solid, 41.0 mg, 74% yield.

m.p.: 158 °C – 160 °C

TLC:  $R_f = 0.34$  (Hexane/EtOAc = 2:1)

IR (KBr): 2927, 1601, 1506, 1357, 1305, 1257, 1163, 1088, 1034, 816, 654, 548  $\text{cm}^{-1}$

$^1\text{H}$  NMR (400 MHz,  $\text{CDCl}_3$ ):  $\delta$  (ppm) 7.64 – 7.55 (m, 3H), 7.53 (s, 1H), 7.50 – 7.45 (m, 2H), 7.31 – 7.23 (m, 1H), 7.13 (d,  $J = 8.1$  Hz, 2H), 7.00 – 6.91 (m, 2H), 6.82 (dd,  $J = 9.1, 2.9$  Hz, 1H), 6.74 – 6.65 (m, 2H), 6.40 (d,  $J = 2.9$  Hz, 1H), 3.79 (s, 3H), 3.63 (s, 3H), 2.45 (s, 3H), 2.36 (s, 3H).

$^{13}\text{C}$  NMR (101 MHz,  $\text{CDCl}_3$ ):  $\delta$  (ppm) 158.7, 156.3, 144.4, 143.5, 136.7, 135.5, 132.8, 132.7, 129.6, 129.5, 128.8, 128.6, 128.2, 127.1, 123.1, 115.3, 114.3, 114.3, 55.4, 55.4, 21.6, 21.5.

HRMS (ESI):  $\text{C}_{28}\text{H}_{29}\text{N}_2\text{O}_6\text{S}_2$   $[\text{M}+\text{H}]^+$ : calcd.: 553.1462; found: 553.1464.

#### Unsuccessful substrates:

##### Amides:

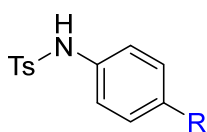

R = OAc,  $\text{OCF}_3$ , NHTs, Me:

No reaction

R =  $\text{NMe}_2$ : con% <15%

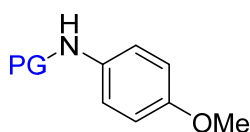

PG = Ac,  $\text{CO}_2\text{Me}$ :

No reaction

PG = Ms: con% <20%

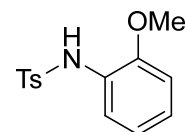

No reaction

##### Arenes:

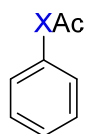

X = O, NH

No reaction

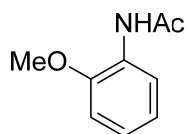

No reaction

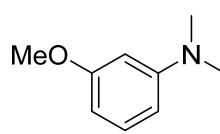

con% <15%

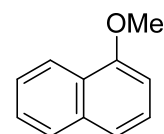

con% <20%

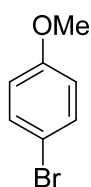

con% <15%

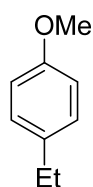

con% <20%

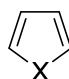

X = O, S

con% <20%

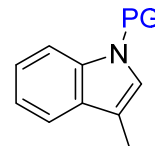

PG = H, Me, Ac, Ts

No reaction

## 5. X-Ray Crystallographic Analysis

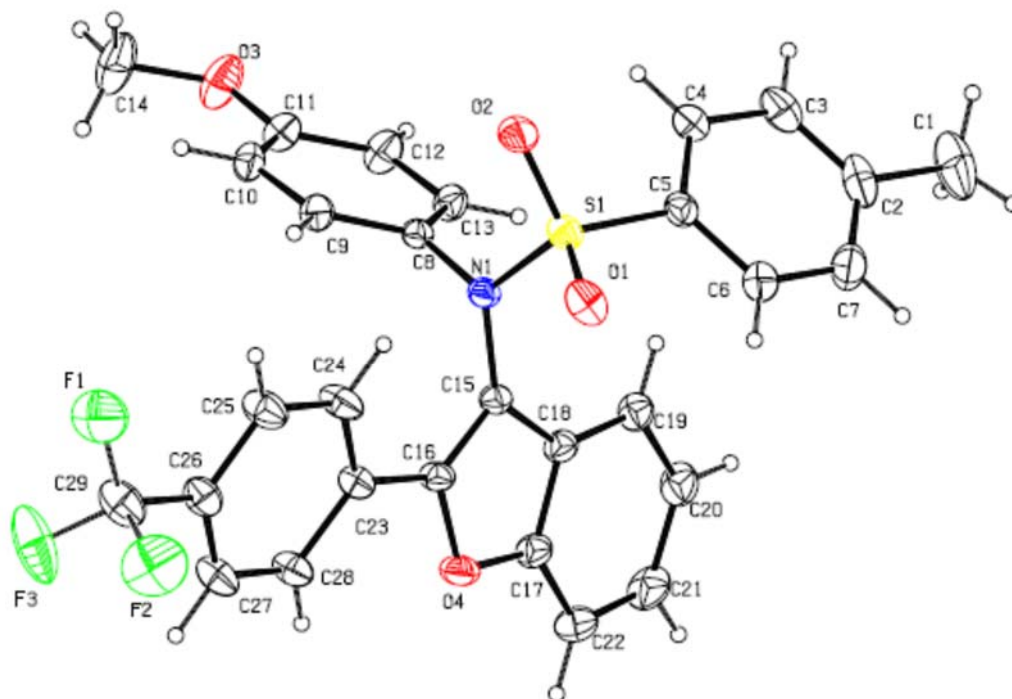

**Table S2** Crystallographic data and structural refinement for compound **3t**

| Complex                        | Compound 1                                                       |
|--------------------------------|------------------------------------------------------------------|
| Formula                        | C <sub>29</sub> H <sub>22</sub> F <sub>3</sub> NO <sub>4</sub> S |
| Formula weight                 | 537.53.                                                          |
| Temp (K)                       | 297(15)                                                          |
| $\lambda$ (Mo, K $\alpha$ ), Å | 0.71073                                                          |
| Crystal system                 | Triclinic                                                        |
| Space group                    | P-1                                                              |
| a (Å)                          | 10.359(2)                                                        |
| b (Å)                          | 11.887(3)                                                        |
| c (Å)                          | 12.512(3)                                                        |
| $\alpha$ (deg)                 | 73.639(4)                                                        |
| $\beta$ (deg)                  | 86.075(4)                                                        |
| $\gamma$ (deg)                 | 89.672(4)                                                        |
| V (Å <sup>3</sup> )            | 1474.7(6)                                                        |

|                                             |                                             |
|---------------------------------------------|---------------------------------------------|
| Z                                           | 2                                           |
| $\rho_{\text{calc}}/\text{cm}^3$            | 1.211                                       |
| Absorption coefficient                      | 0.160 mm <sup>-1</sup>                      |
| F(000)                                      | 556                                         |
| Crystal size/mm <sup>3</sup>                | 0.3 × 0.2 × 2                               |
| Index ranges                                | -12 ≤ h ≤ 12, -14 ≤ k ≤ 14,<br>-14 ≤ l ≤ 14 |
| Reflections collected                       | 10483                                       |
| Independent reflections                     | 5153 [R <sub>int</sub> = 0.0387]            |
| Data/restraints/parameters                  | 5153/57/374                                 |
| Largest diff. peak/hole / e Å <sup>-3</sup> | 0.274/-0.323                                |
| Flack parameter                             | 0.01(3)                                     |
| Theta range for data collection (deg)       | 1.700–24.996                                |
| Final R1a, wR2b                             | 0.0594, 0.1719                              |
| Goodness-of-fit on F2                       | 1.063                                       |

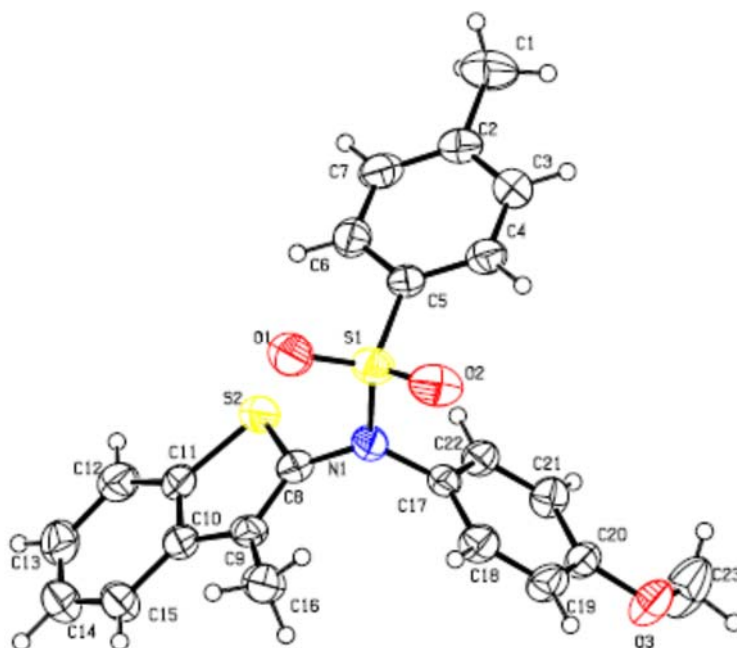

**Table S3** Crystallographic data and structural refinement for compound **5b**

| Complex | Compound 1 |
|---------|------------|
|---------|------------|



|                                             |                                                                |
|---------------------------------------------|----------------------------------------------------------------|
| Formula                                     | C <sub>23</sub> H <sub>21</sub> NO <sub>3</sub> S <sub>2</sub> |
| Formula weight                              | 423.53                                                         |
| Temp (K)                                    | 297(2)                                                         |
| $\lambda$ (Mo, K $\alpha$ ), Å              | 0.71073                                                        |
| Crystal system                              | Monoclinic                                                     |
| Space group                                 | P2 <sub>1</sub> /n                                             |
| a (Å)                                       | 8.2878(17)                                                     |
| b (Å)                                       | 21.266(4)                                                      |
| c (Å)                                       | 11.819(2)                                                      |
| $\alpha$ (deg)                              | 90                                                             |
| $\beta$ (deg)                               | 100.442(5)                                                     |
| $\gamma$ (deg)                              | 90                                                             |
| V (Å <sup>3</sup> )                         | 2048.5(7)                                                      |
| Z                                           | 4                                                              |
| $\rho_{\text{calc}}/\text{cm}^3$            | 1.373                                                          |
| Absorption coefficient                      | 0.285                                                          |
| F(000)                                      | 888                                                            |
| Crystal size/mm <sup>3</sup>                | 0.12 × 0.10 × 0.10                                             |
| Index ranges                                | -9 ≤ h ≤ 9, -25 ≤ k ≤ 25,<br>-11 ≤ l ≤ 13                      |
| Reflections collected                       | 10005                                                          |
| Independent reflections                     | 3510 [R <sub>int</sub> = 0.0439]                               |
| Data/restraints/parameters                  | 3510/0/266                                                     |
| Largest diff. peak/hole / e Å <sup>-3</sup> | 0.226/-0.235                                                   |
| Flack parameter                             | 0.0000(3)                                                      |
| Theta range for data collection (deg)       | 1.915–24.995                                                   |
| Final R1a, wR2b                             | 0.0555, 0.0971                                                 |
| Goodness-of-fit on F2                       | 1.010                                                          |

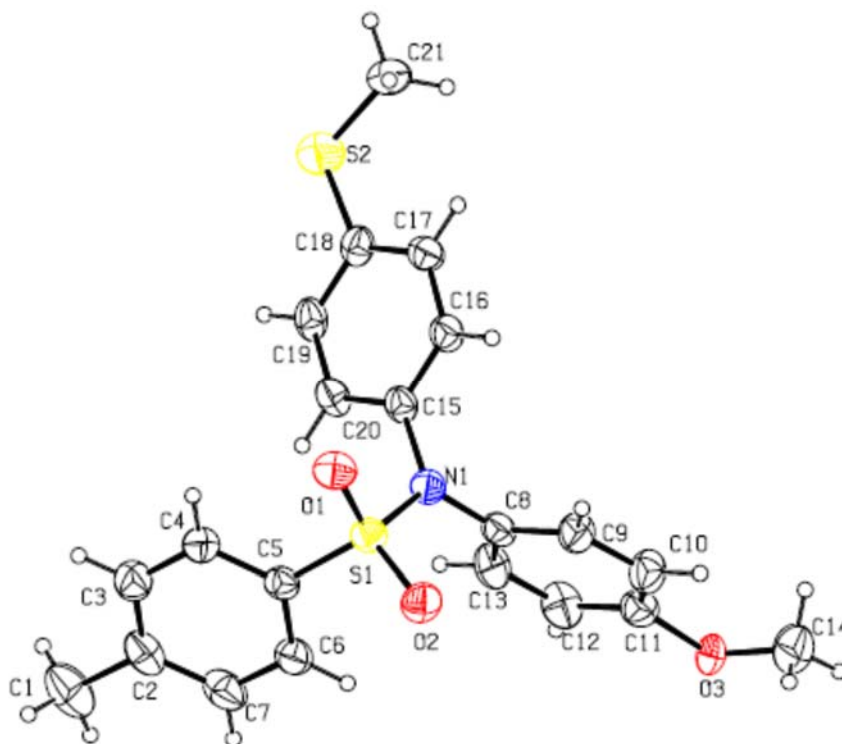

**Table S4** Crystallographic data and structural refinement for compound **7f**

| Complex                          | Compound 1                                                     |
|----------------------------------|----------------------------------------------------------------|
| Formula                          | C <sub>21</sub> H <sub>21</sub> NO <sub>3</sub> S <sub>2</sub> |
| Formula weight                   | 399.51                                                         |
| Temp (K)                         | 297(15)                                                        |
| $\lambda$ (Mo, K $\alpha$ ), Å   | 0.71073                                                        |
| Crystal system                   | Monoclinic                                                     |
| Space group                      | P2 <sub>1</sub> /c                                             |
| a (Å)                            | 12.583(3)                                                      |
| b (Å)                            | 13.374(3)                                                      |
| c (Å)                            | 11.959(3)                                                      |
| $\alpha$ (deg)                   | 90                                                             |
| $\beta$ (deg)                    | 98.369(4)                                                      |
| $\gamma$ (deg)                   | 90                                                             |
| V (Å <sup>3</sup> )              | 1991.0(7)                                                      |
| Z                                | 4                                                              |
| $\rho_{\text{calc}}/\text{cm}^3$ | 1.333                                                          |

|                                             |                                             |
|---------------------------------------------|---------------------------------------------|
| Absorption coefficient                      | 0.288                                       |
| F(000)                                      | 840                                         |
| Crystal size/mm <sup>3</sup>                | 0.20 × 0.20 × 0.10                          |
| Index ranges                                | -14 ≤ h ≤ 14, -15 ≤ k ≤ 15,<br>-14 ≤ l ≤ 13 |
| Reflections collected                       | 13308                                       |
| Independent reflections                     | 3427 [R <sub>int</sub> = 0.0375]            |
| Data/restraints/parameters                  | 3427/20/241                                 |
| Largest diff. peak/hole / e Å <sup>-3</sup> | 0.968/-0.883                                |
| Flack parameter                             | n/a                                         |
| Theta range for data collection (deg)       | 2.235–24.996                                |
| Final R1a, wR2b                             | 0.0677, 0.1885                              |
| Goodness-of-fit on F <sup>2</sup>           | 1.030                                       |

---

## 6. NMR Spectra of Products

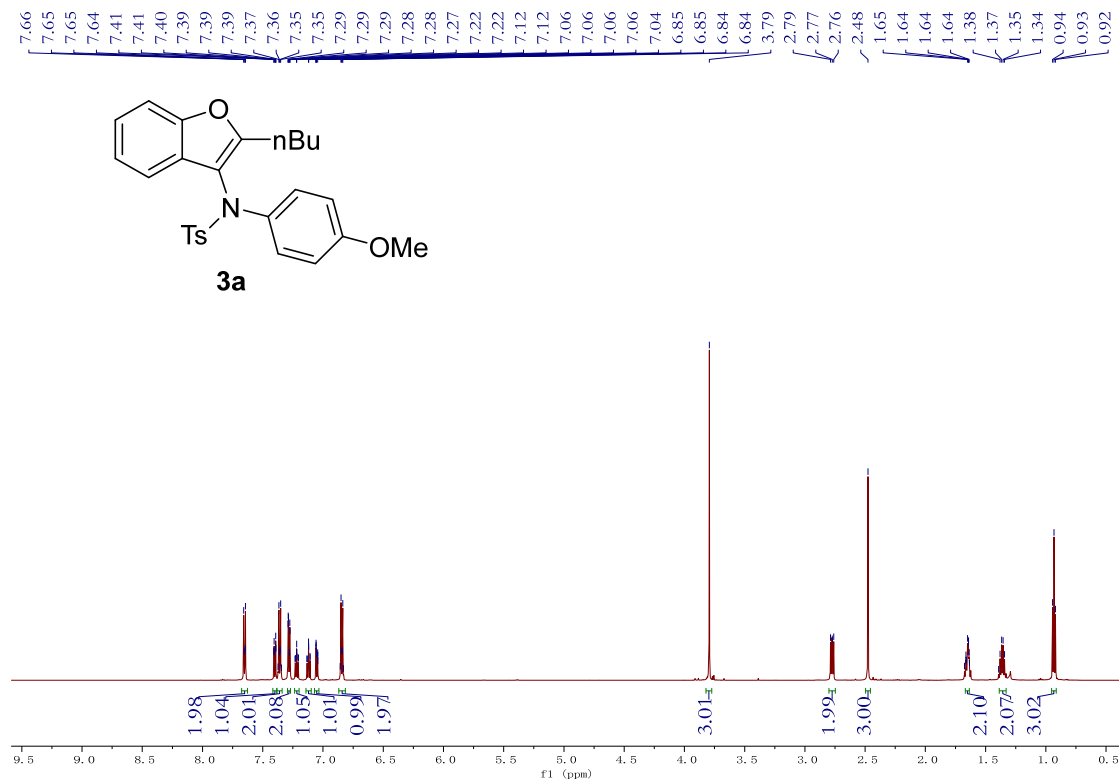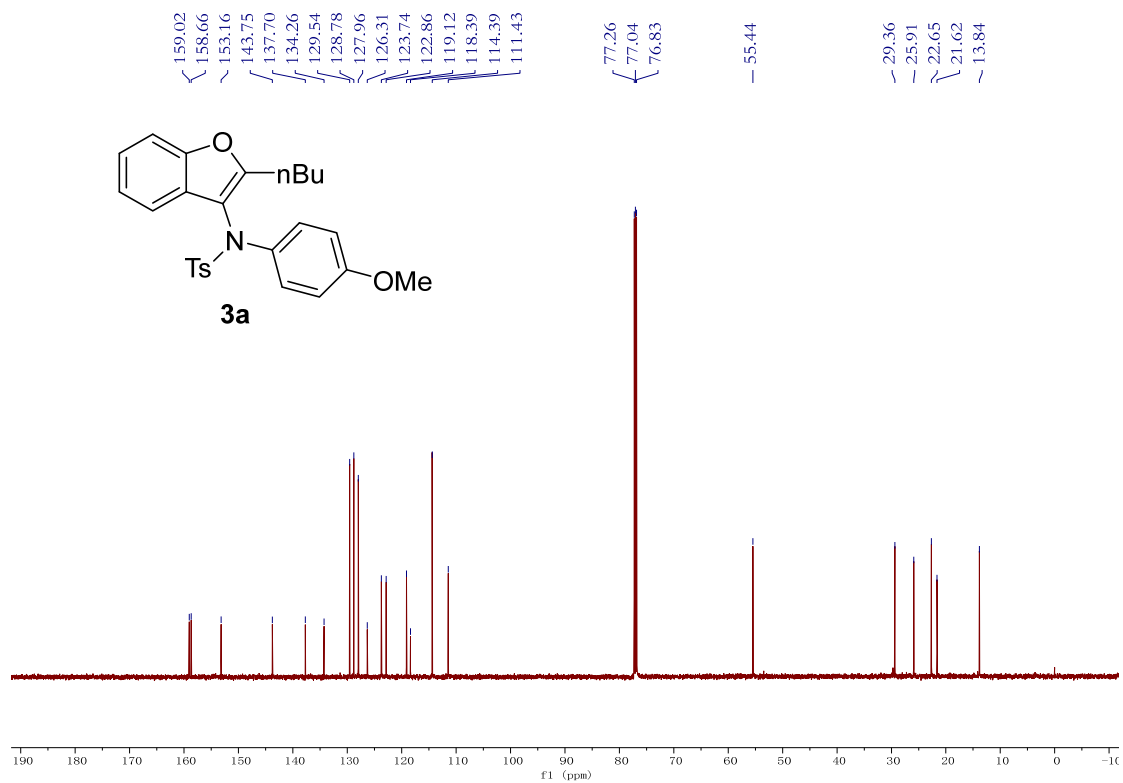

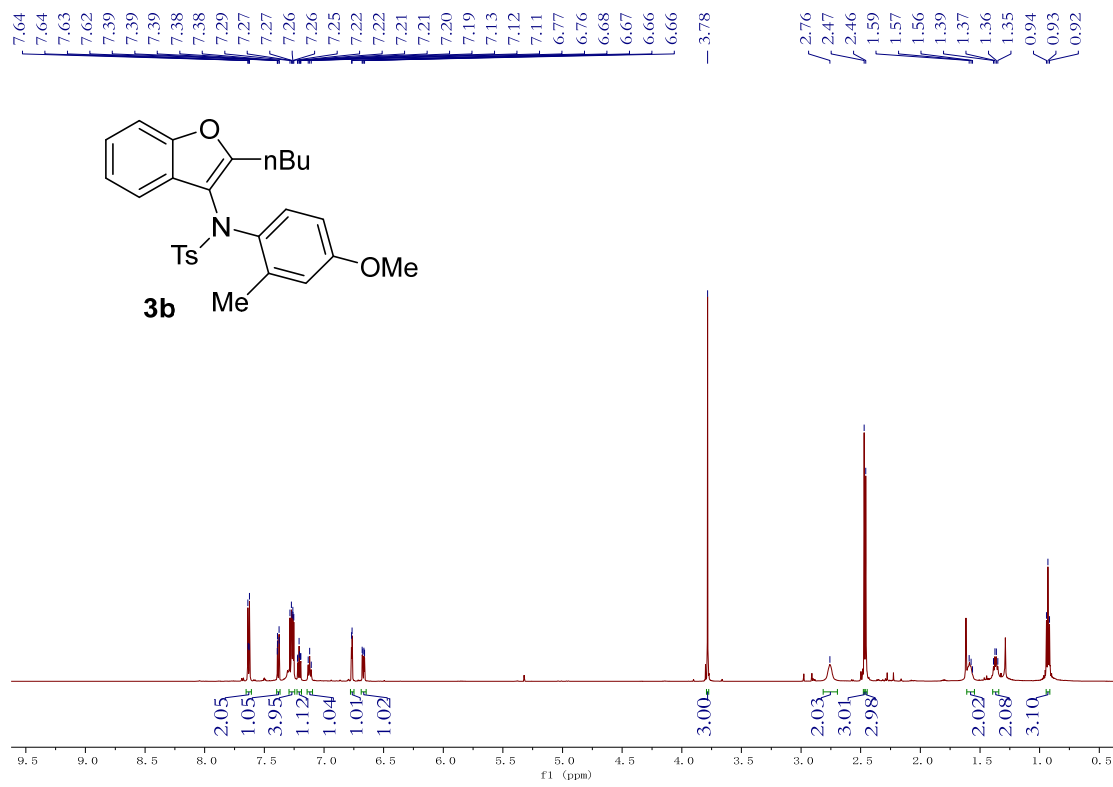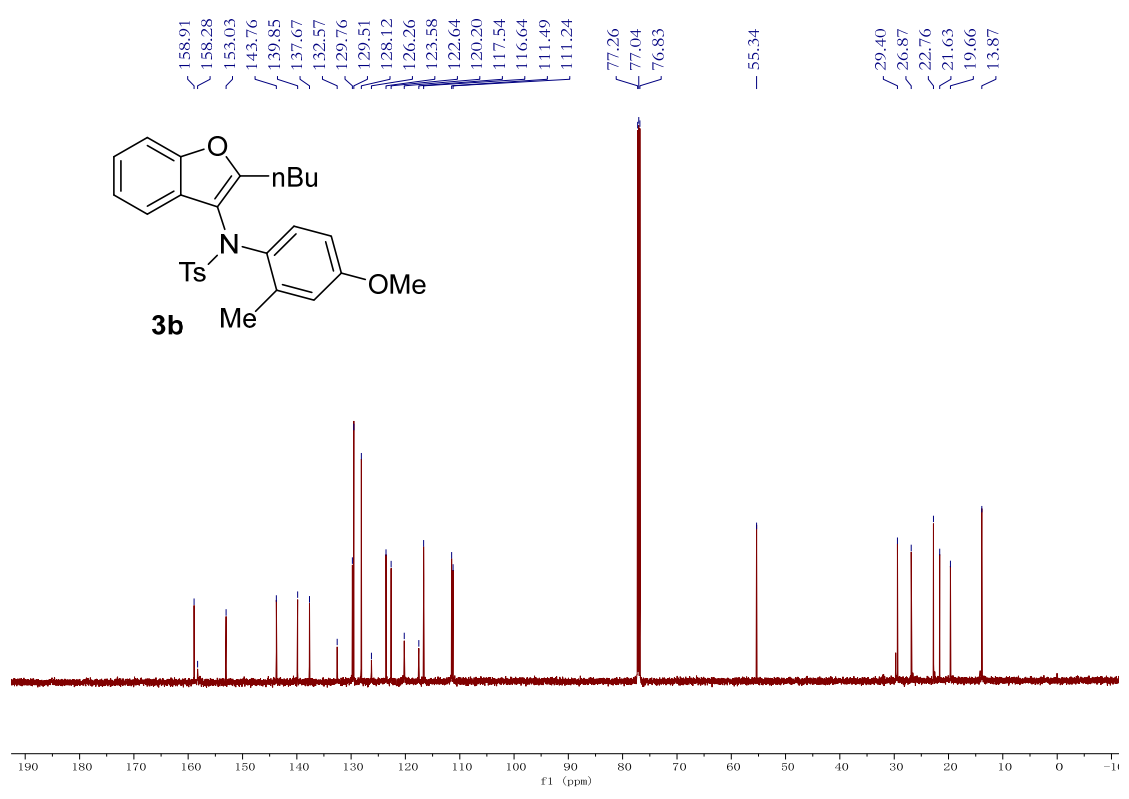

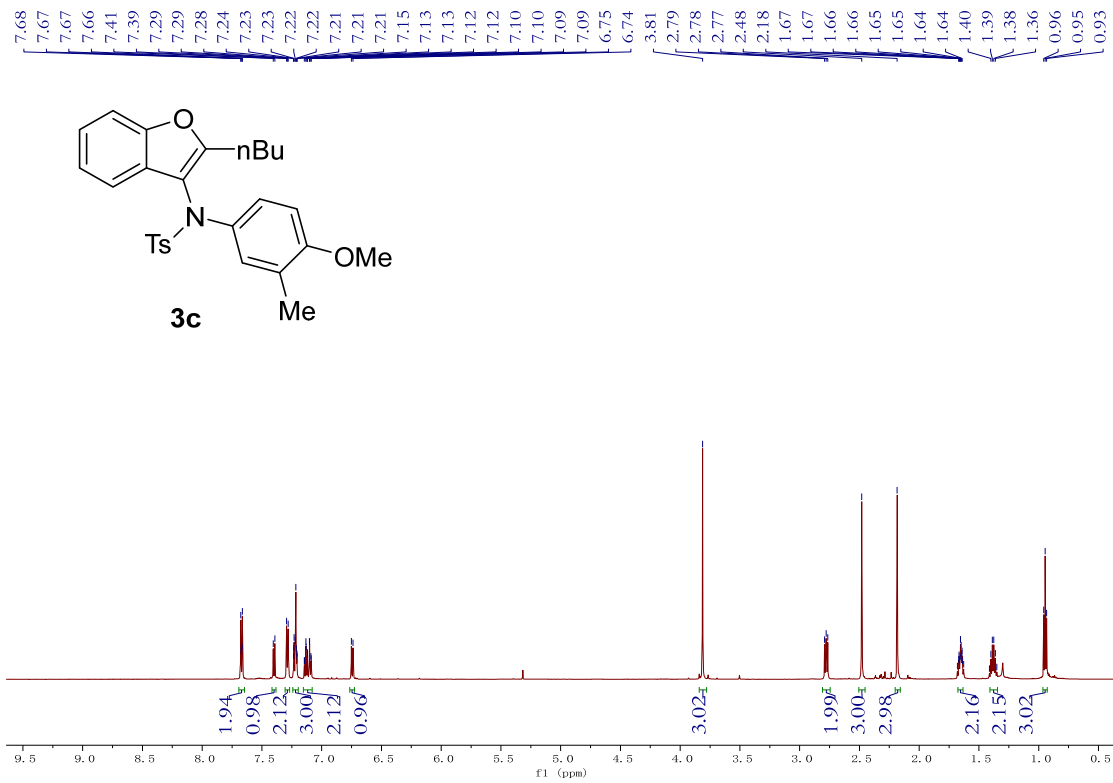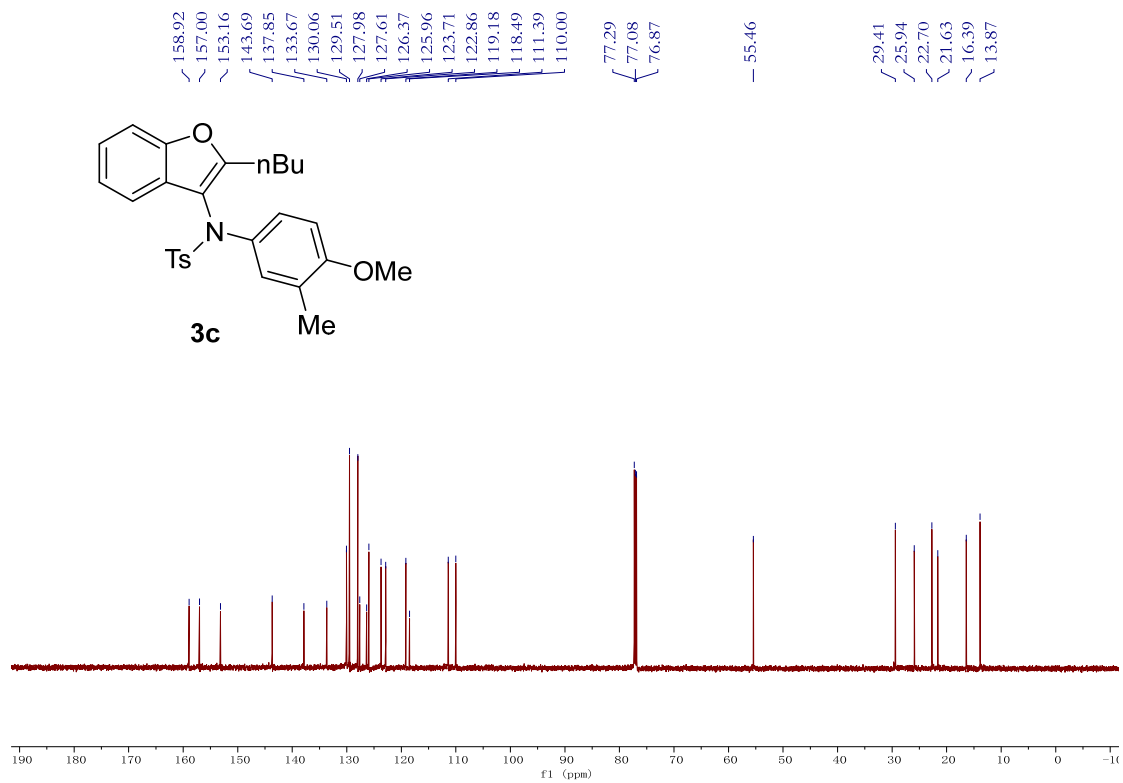

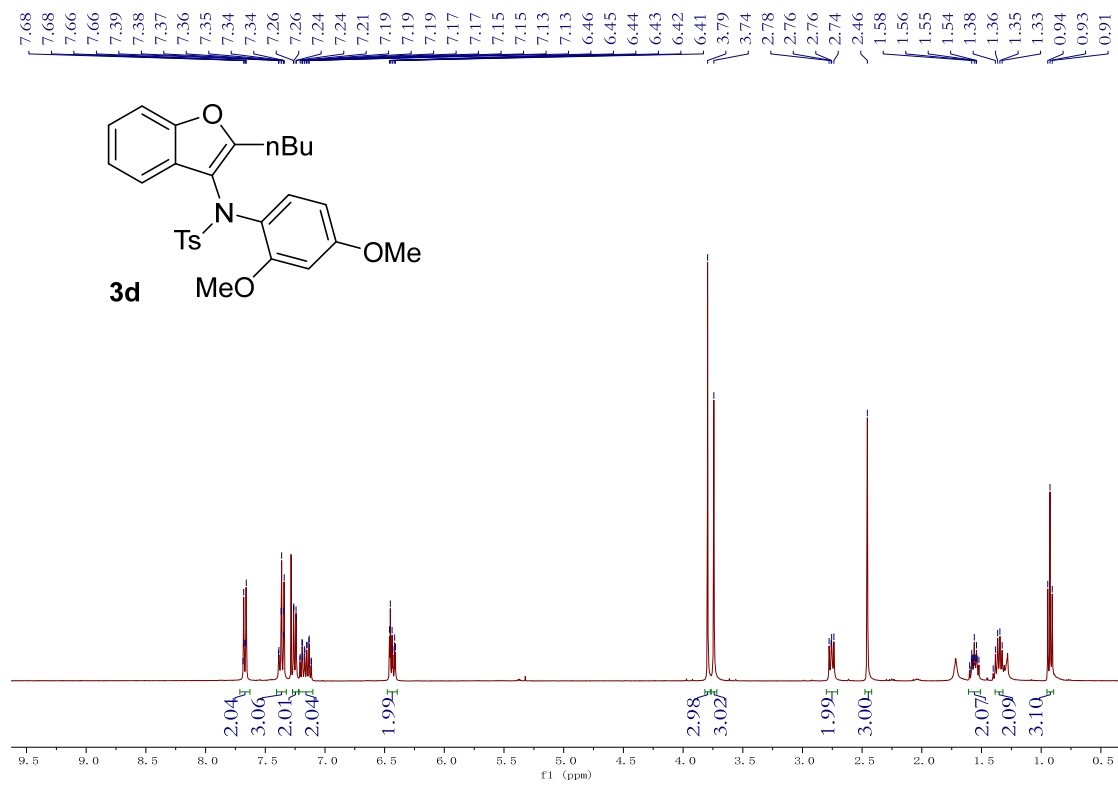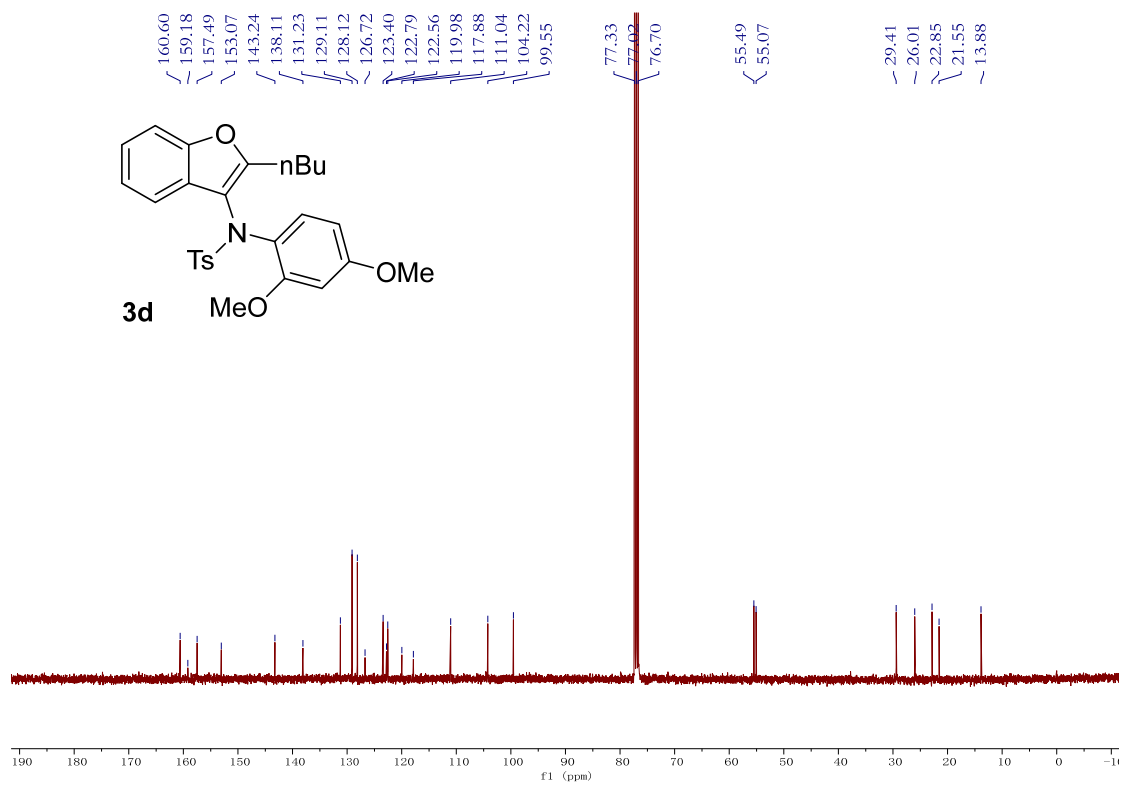

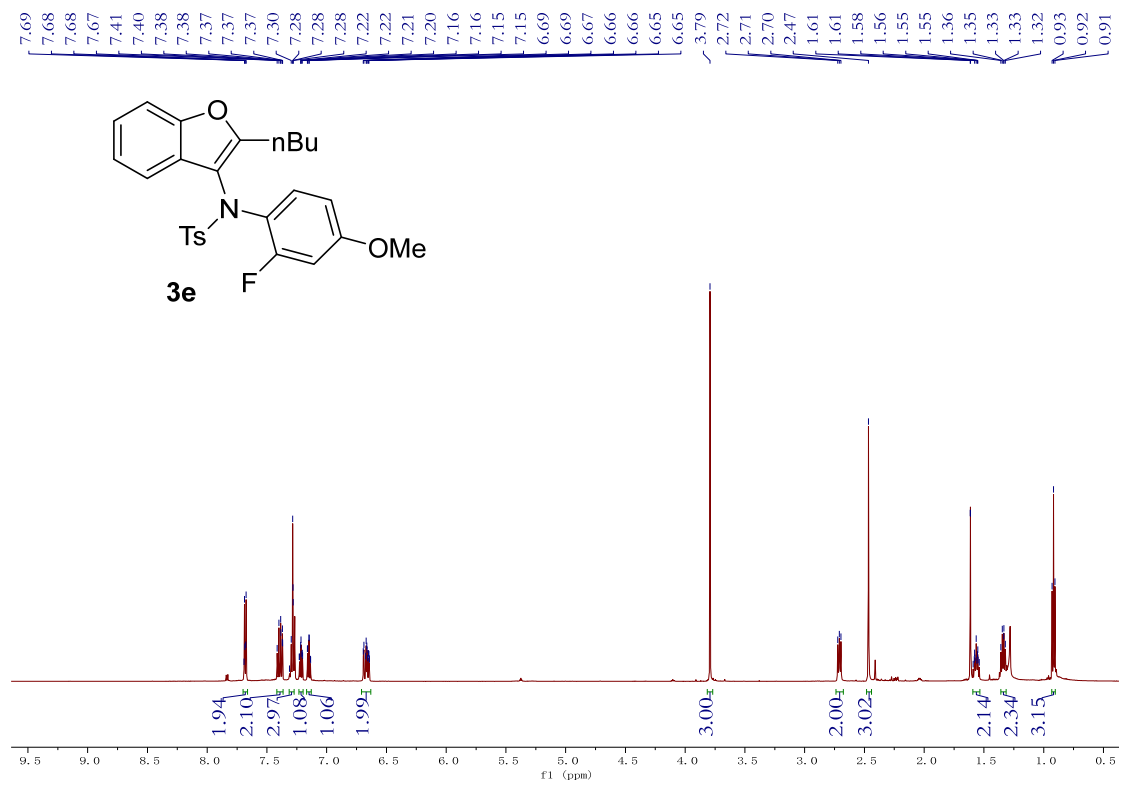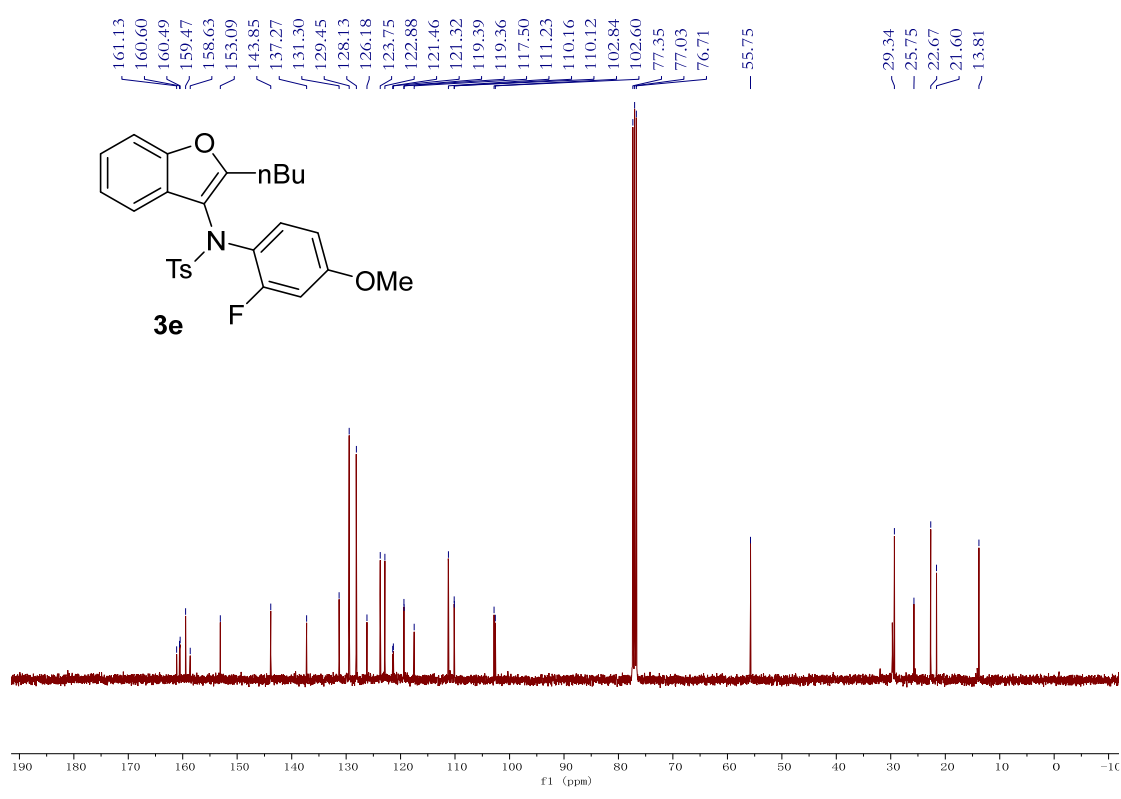



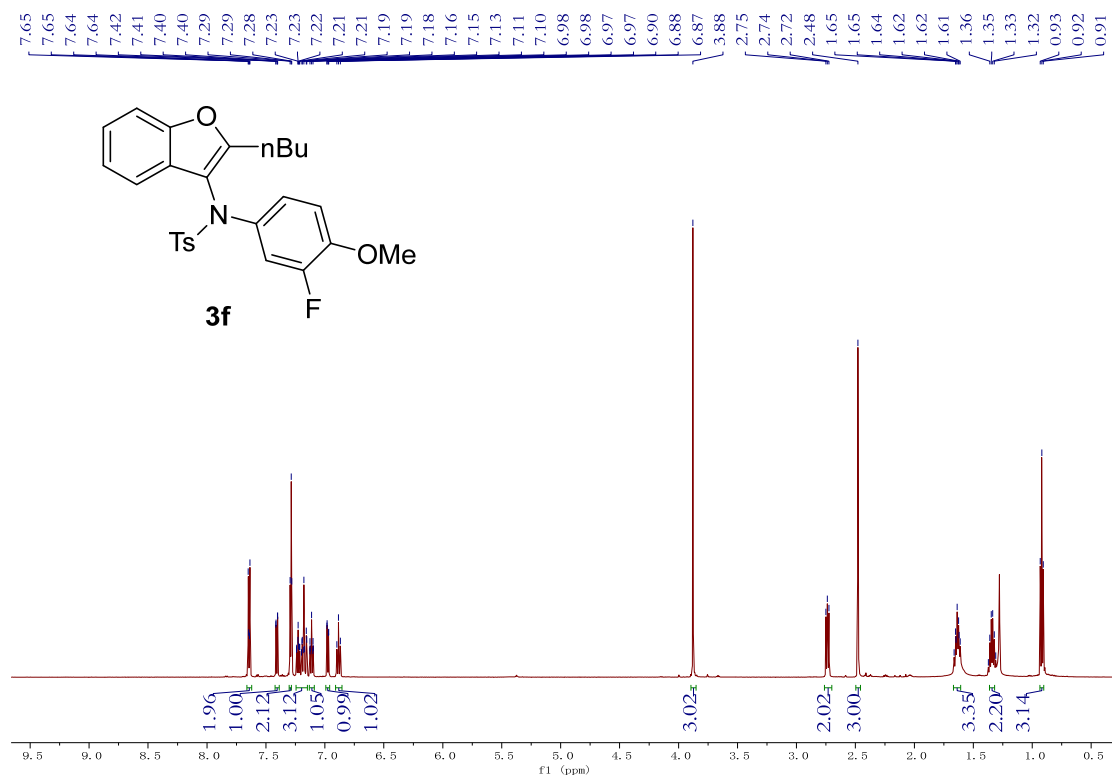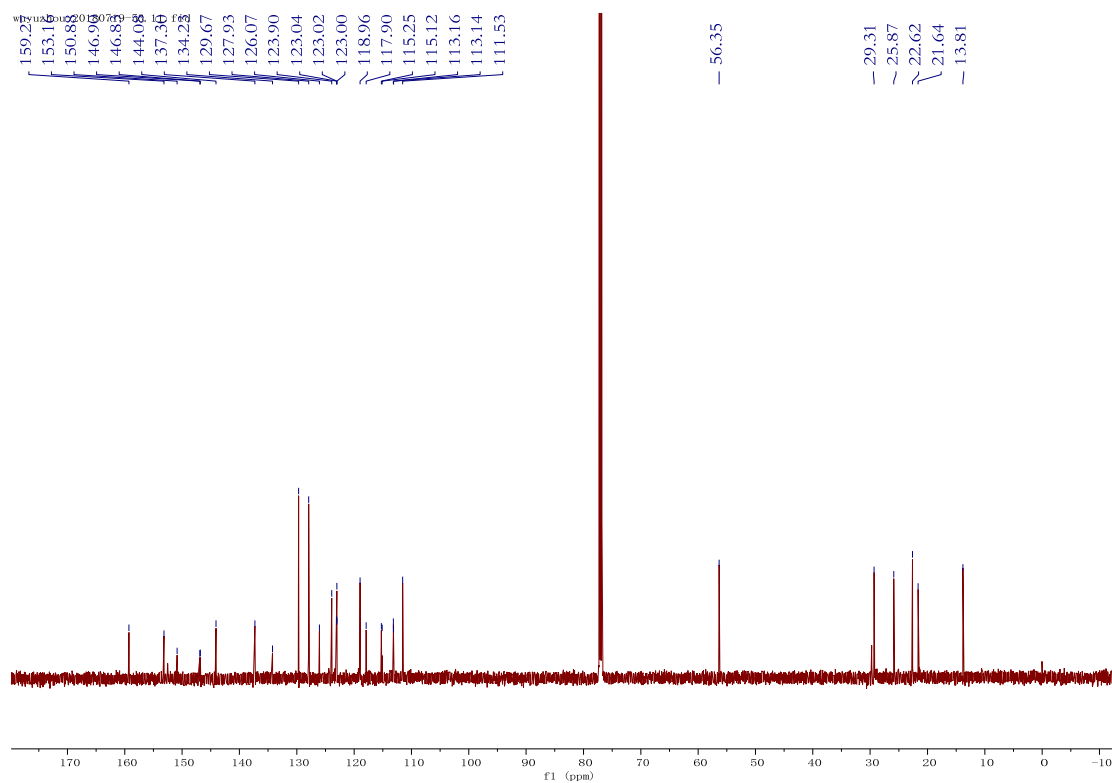

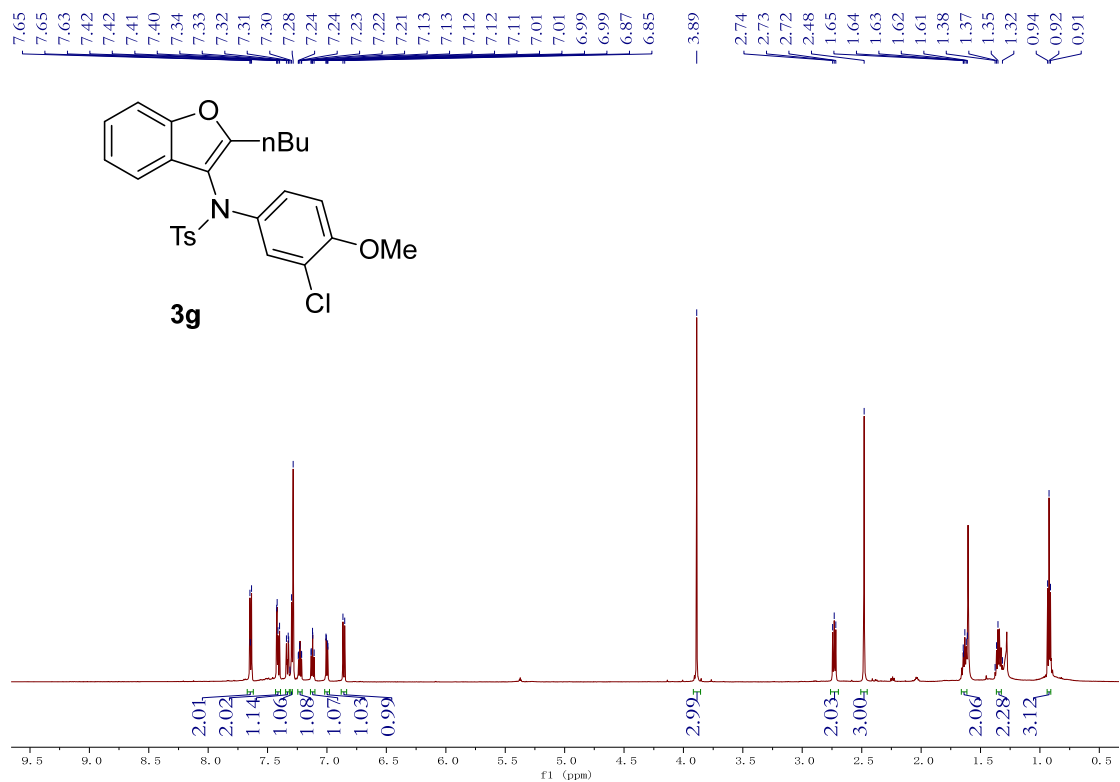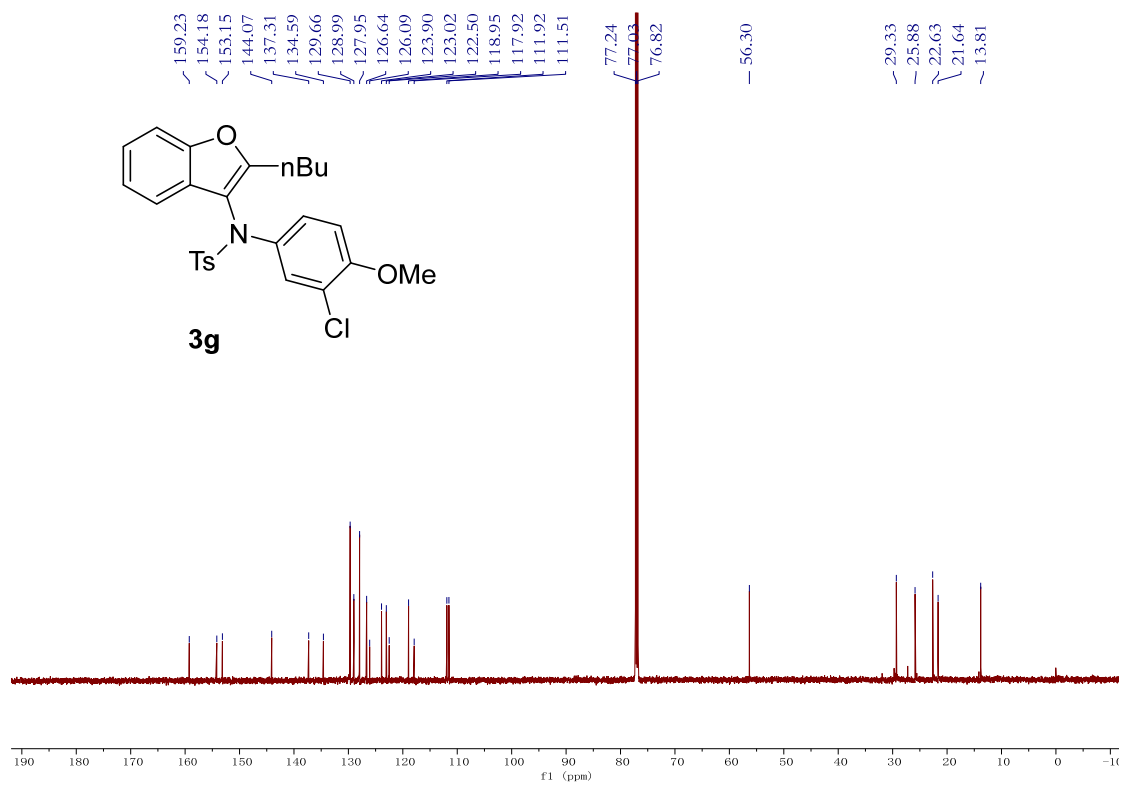

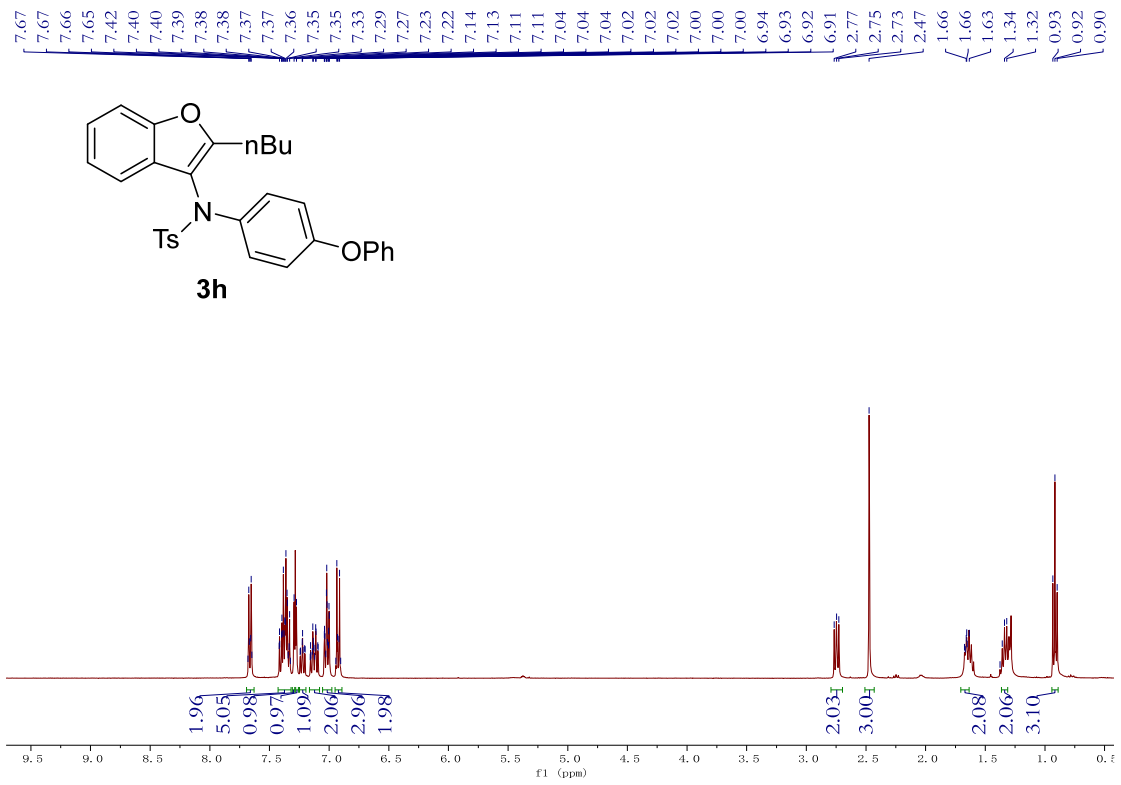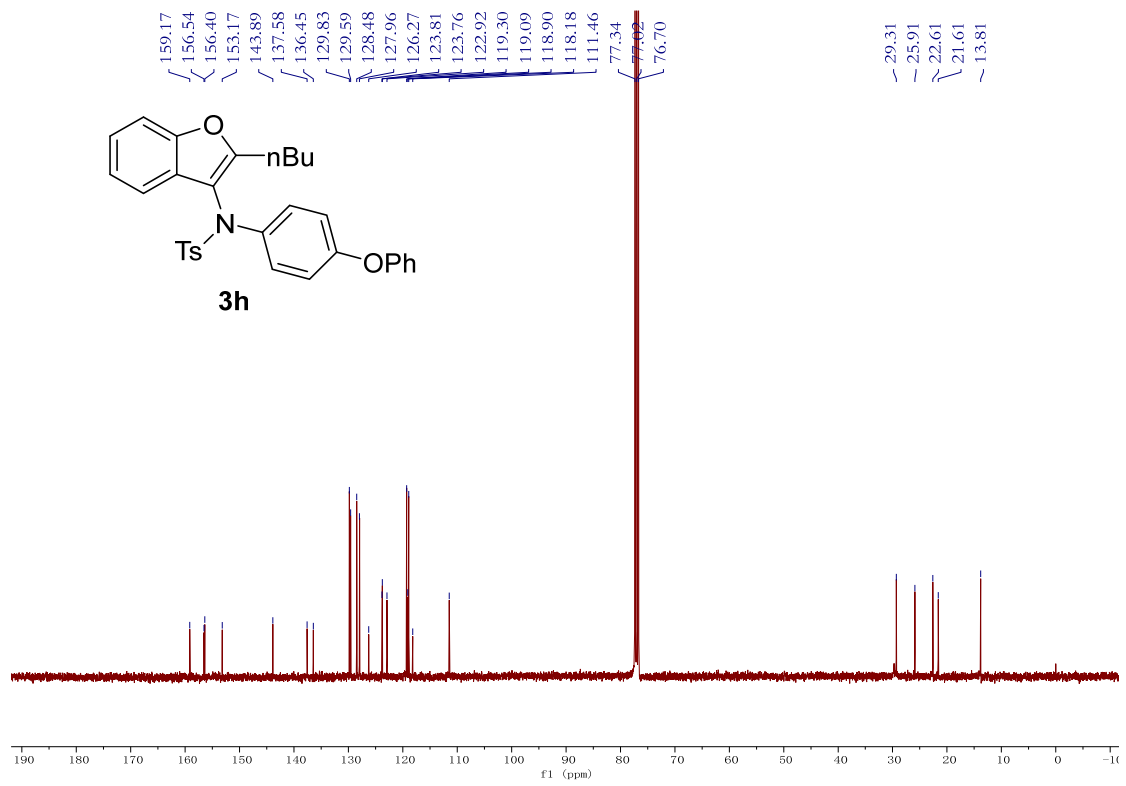

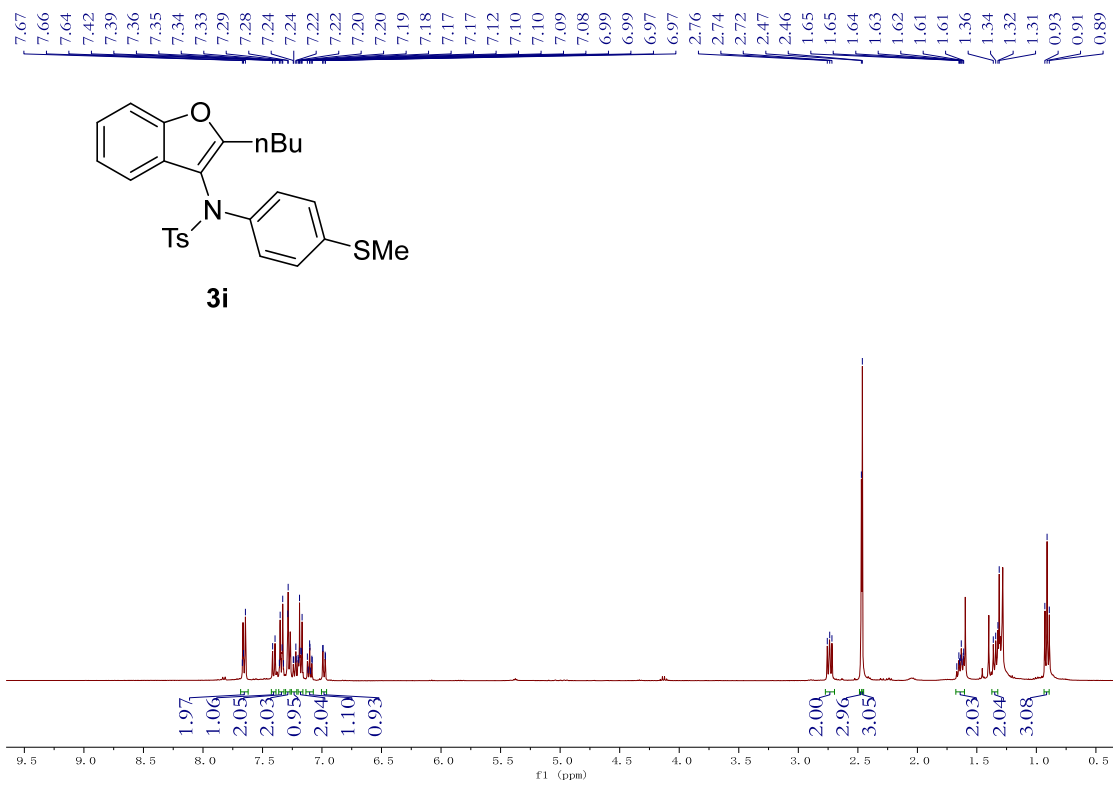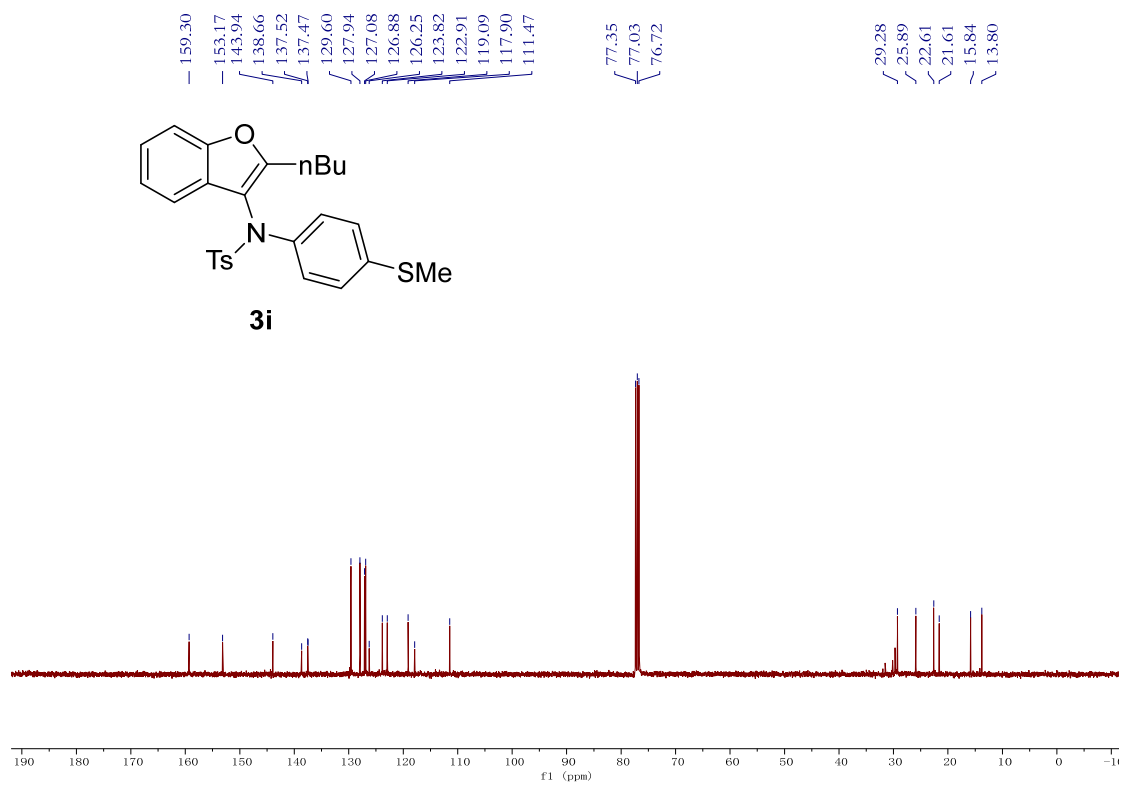

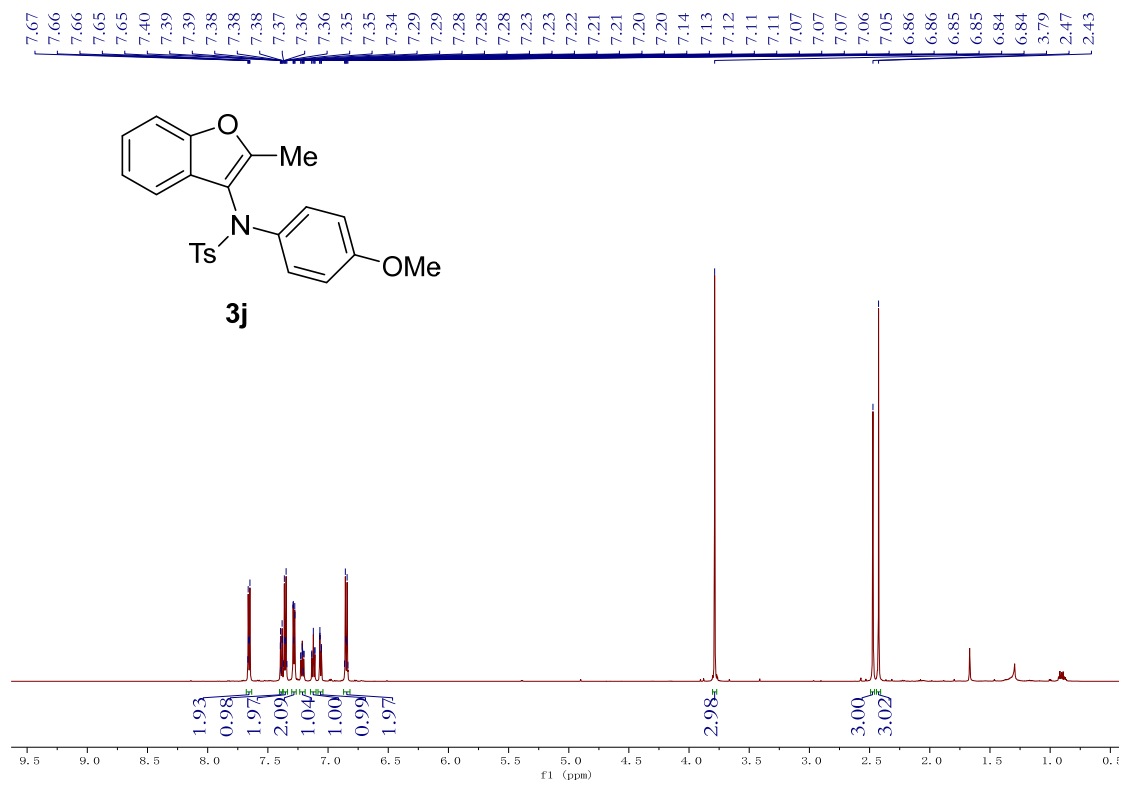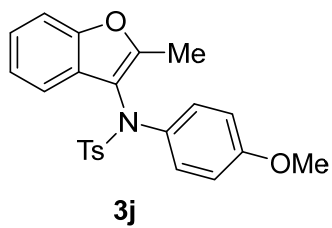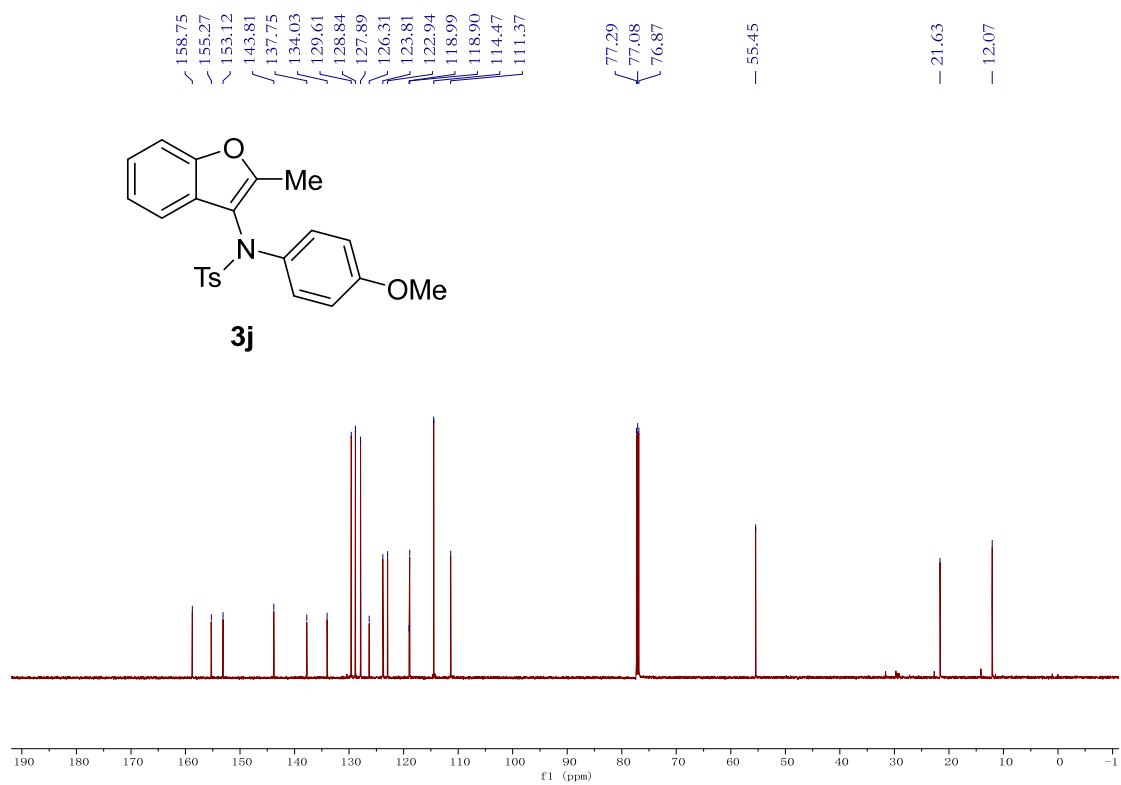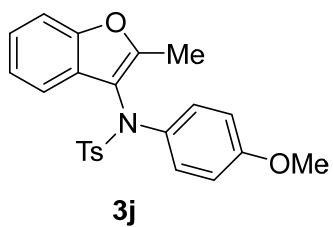

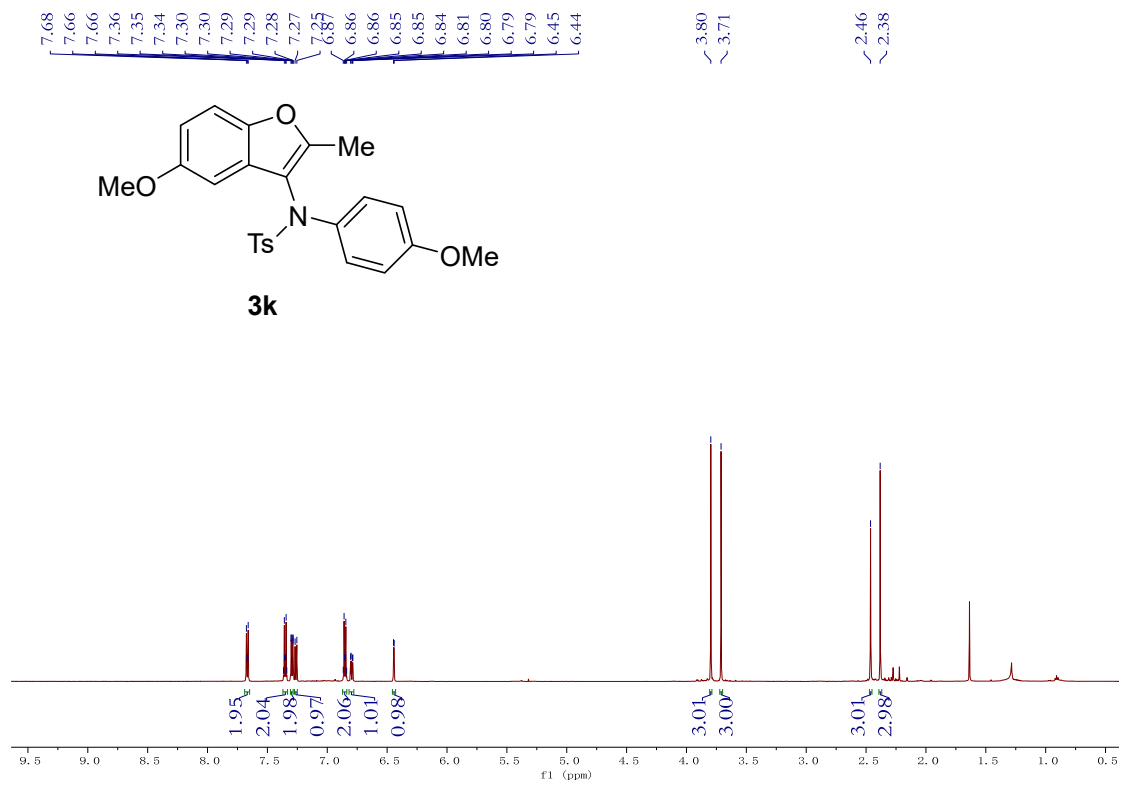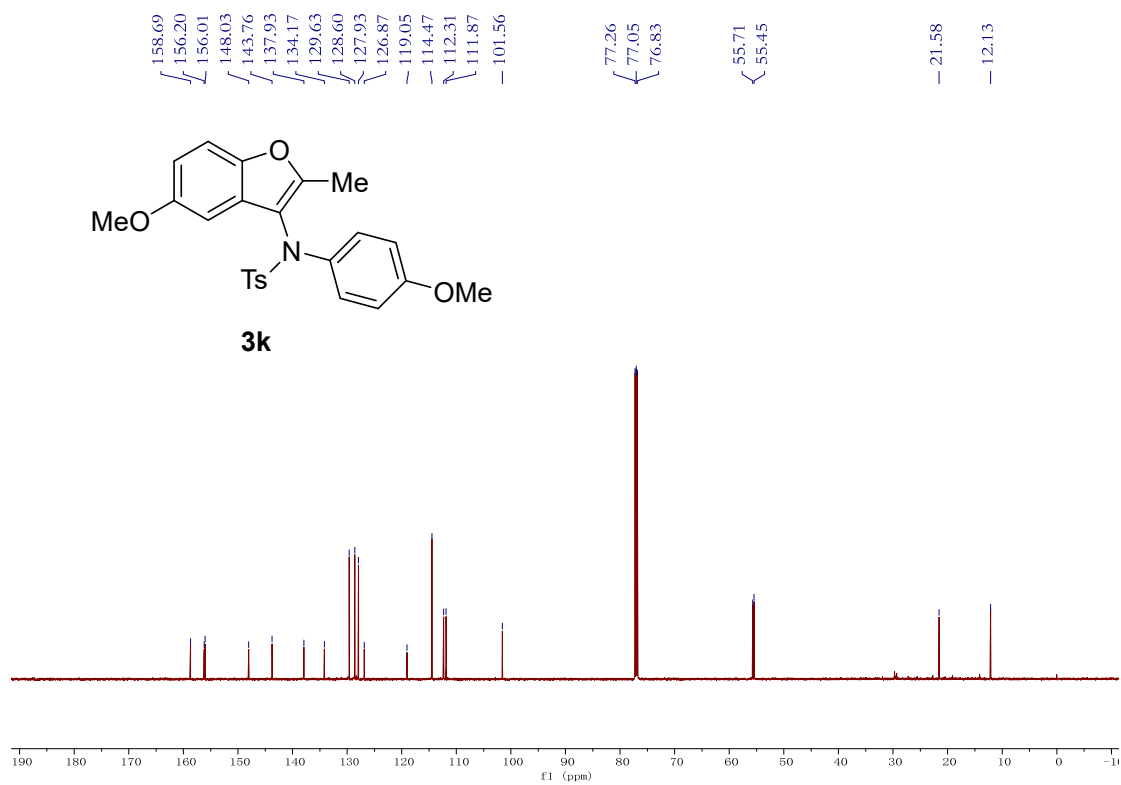

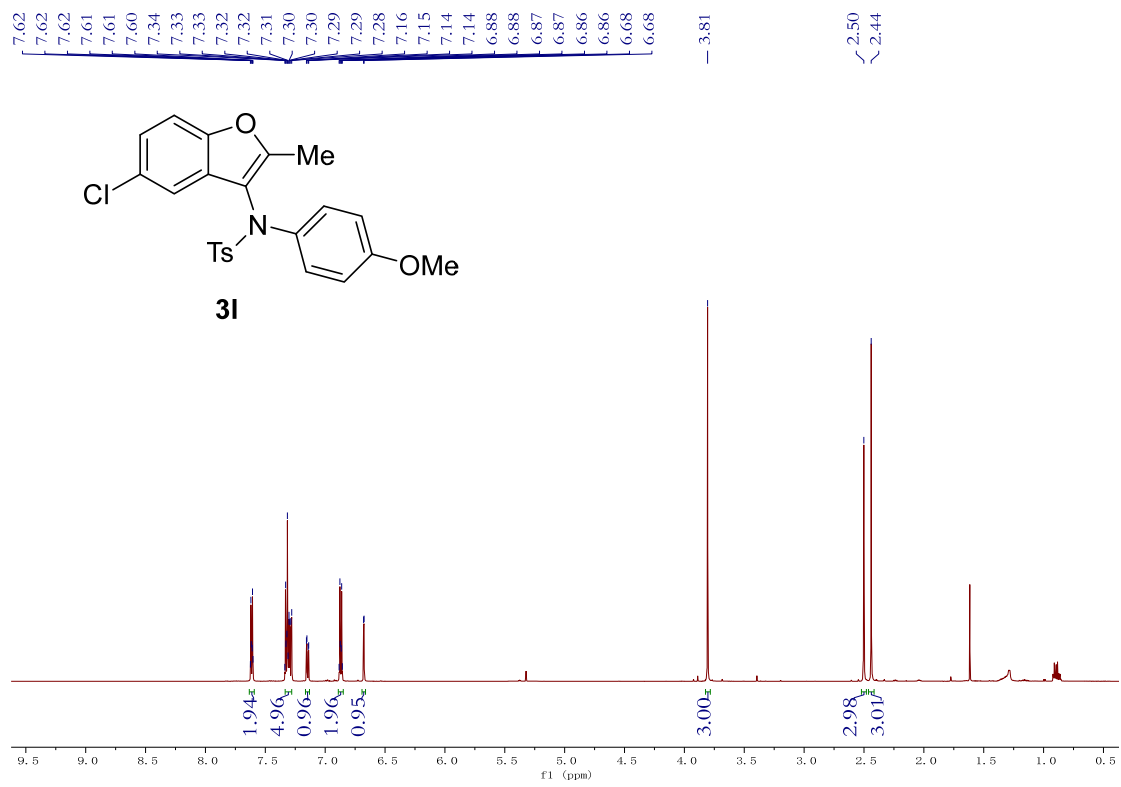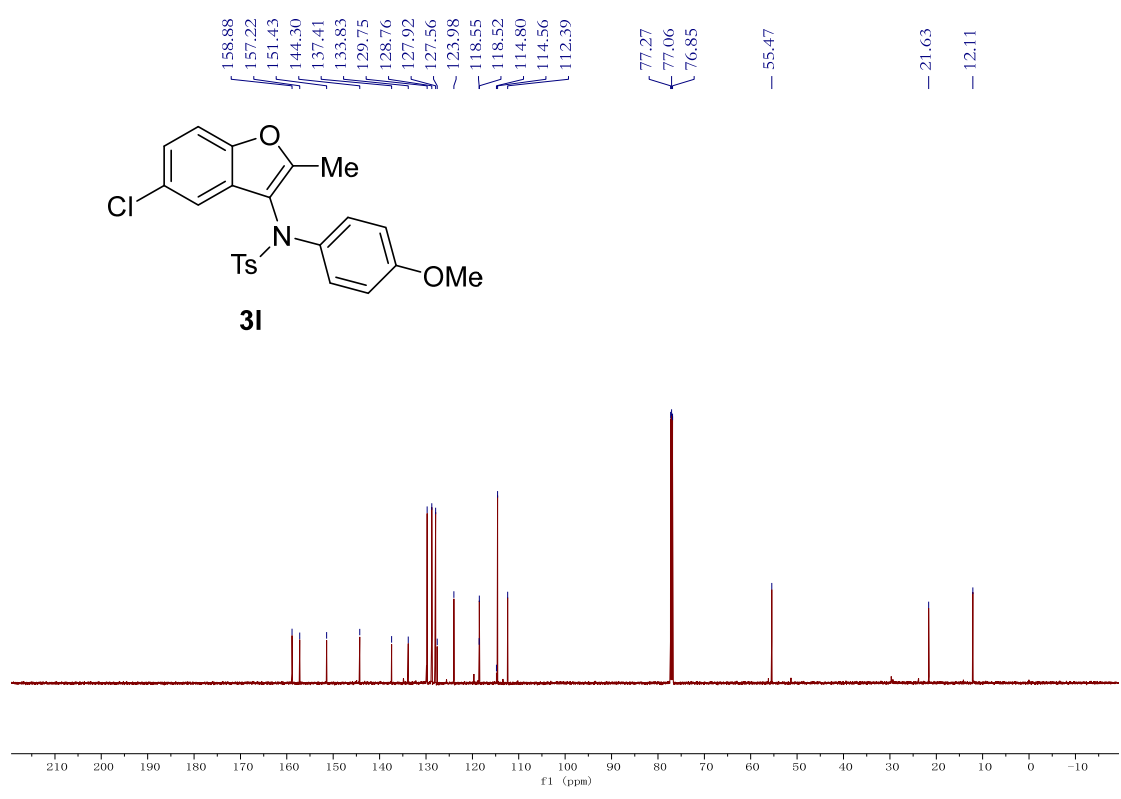

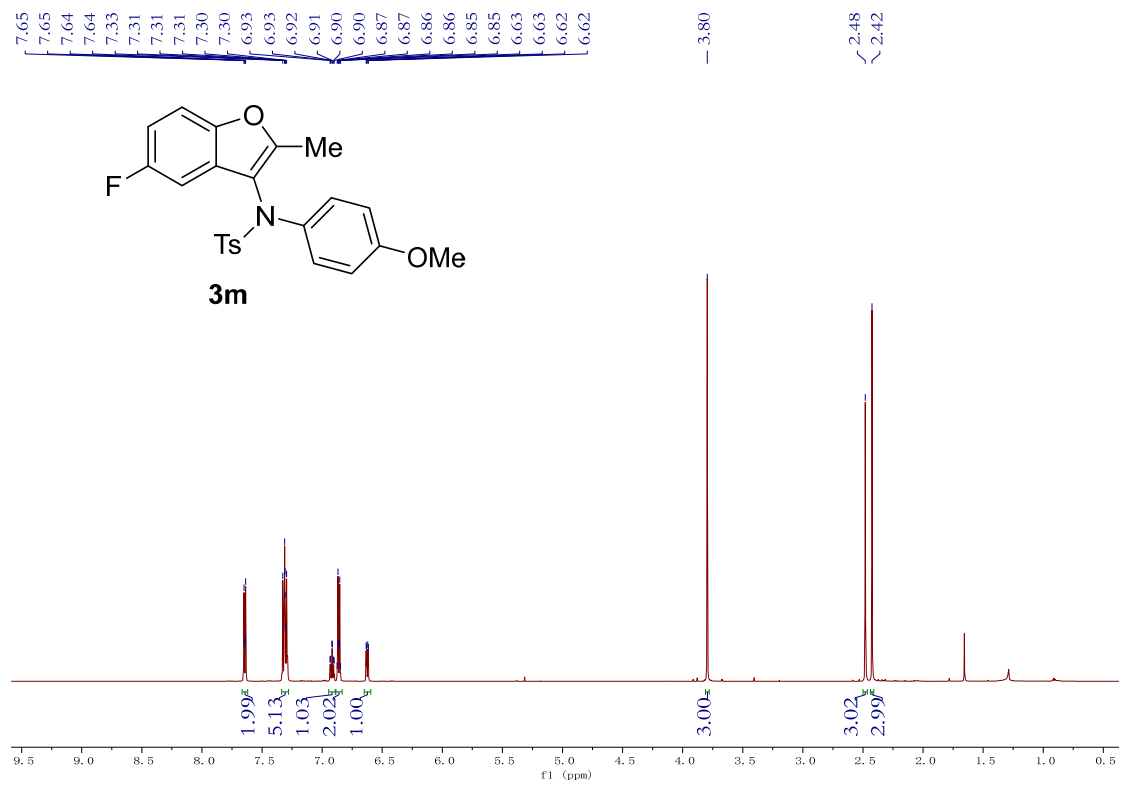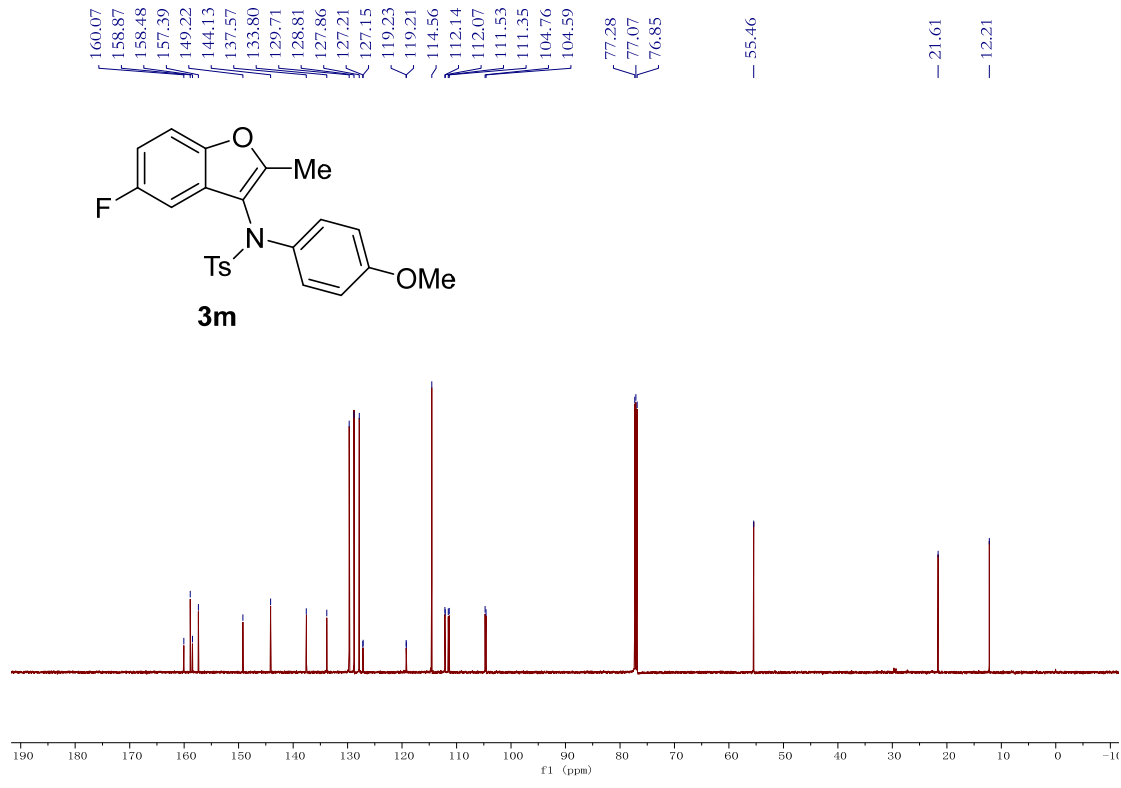



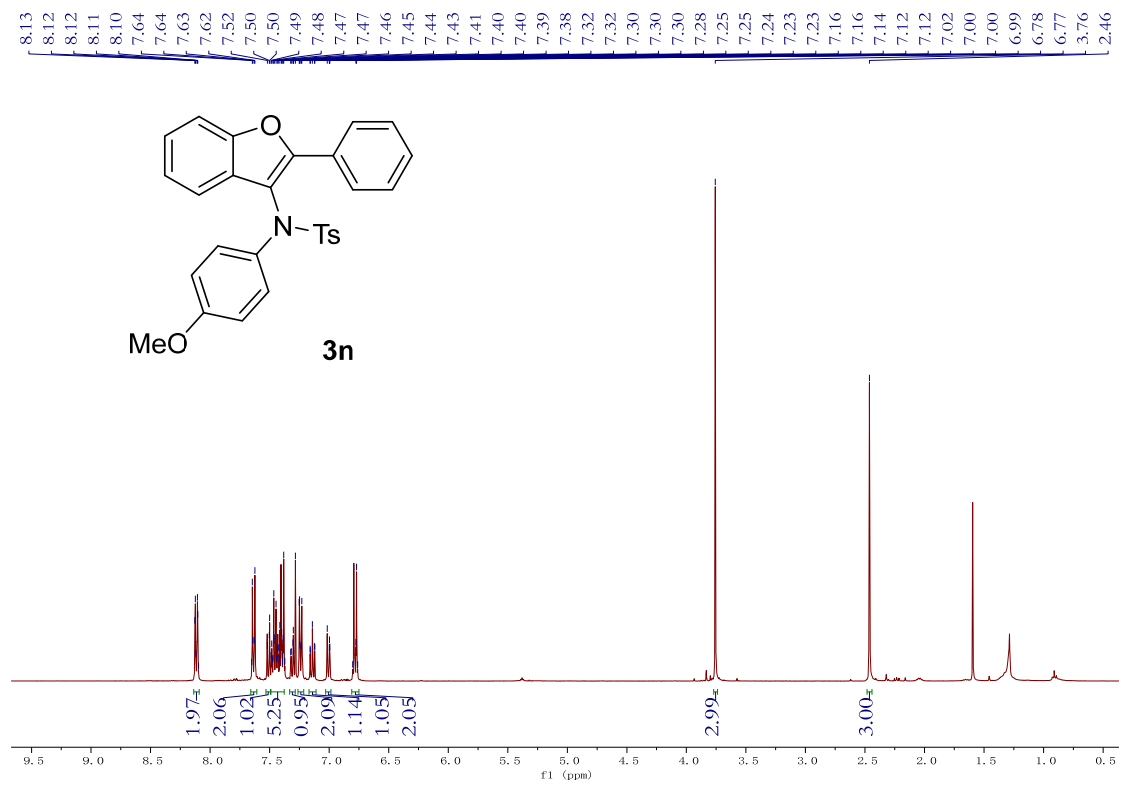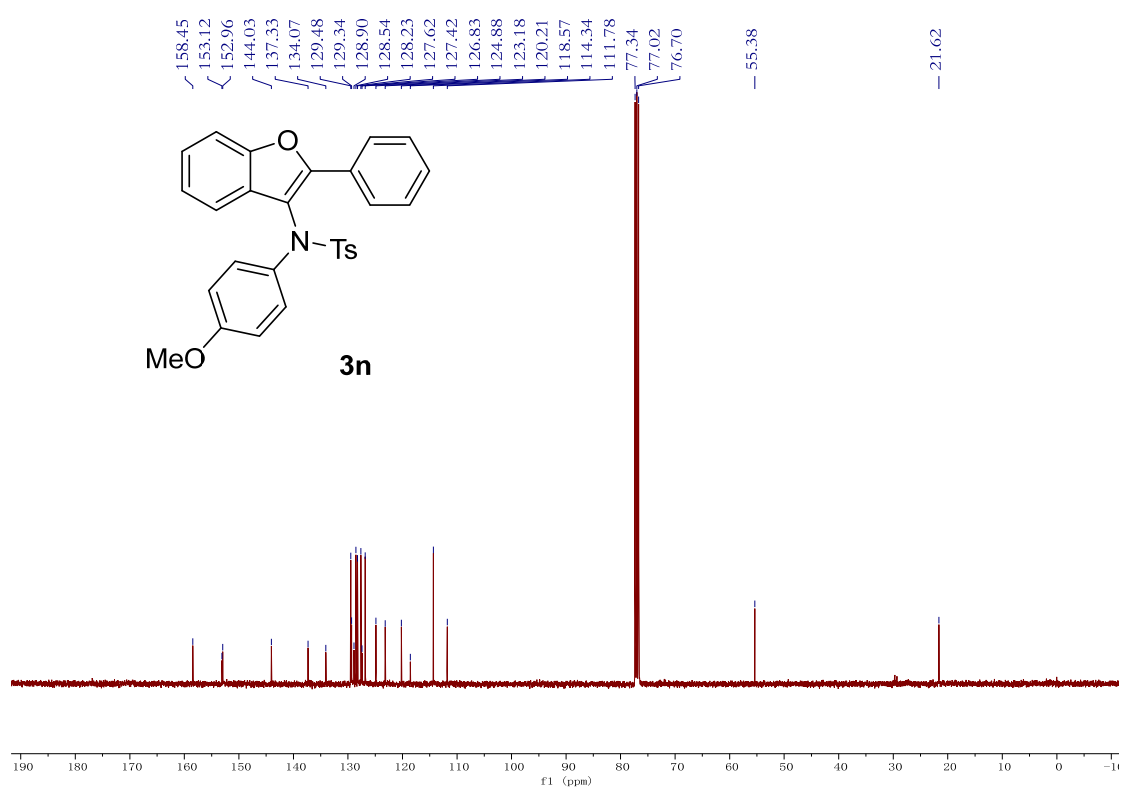

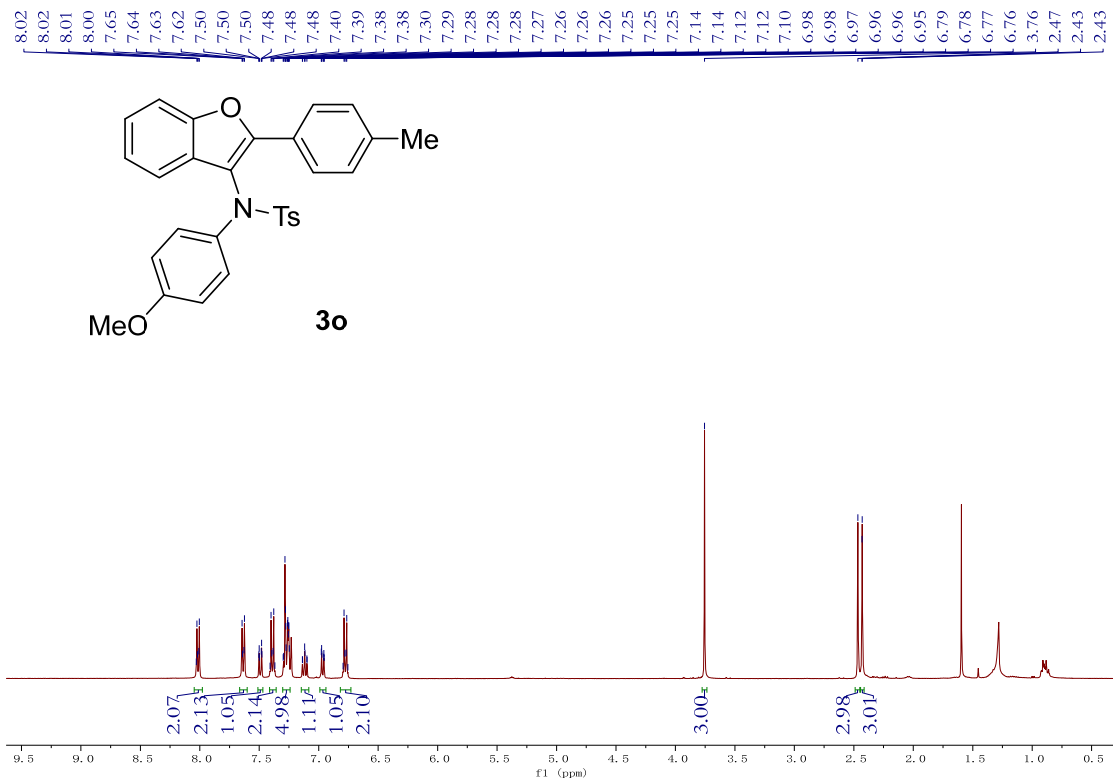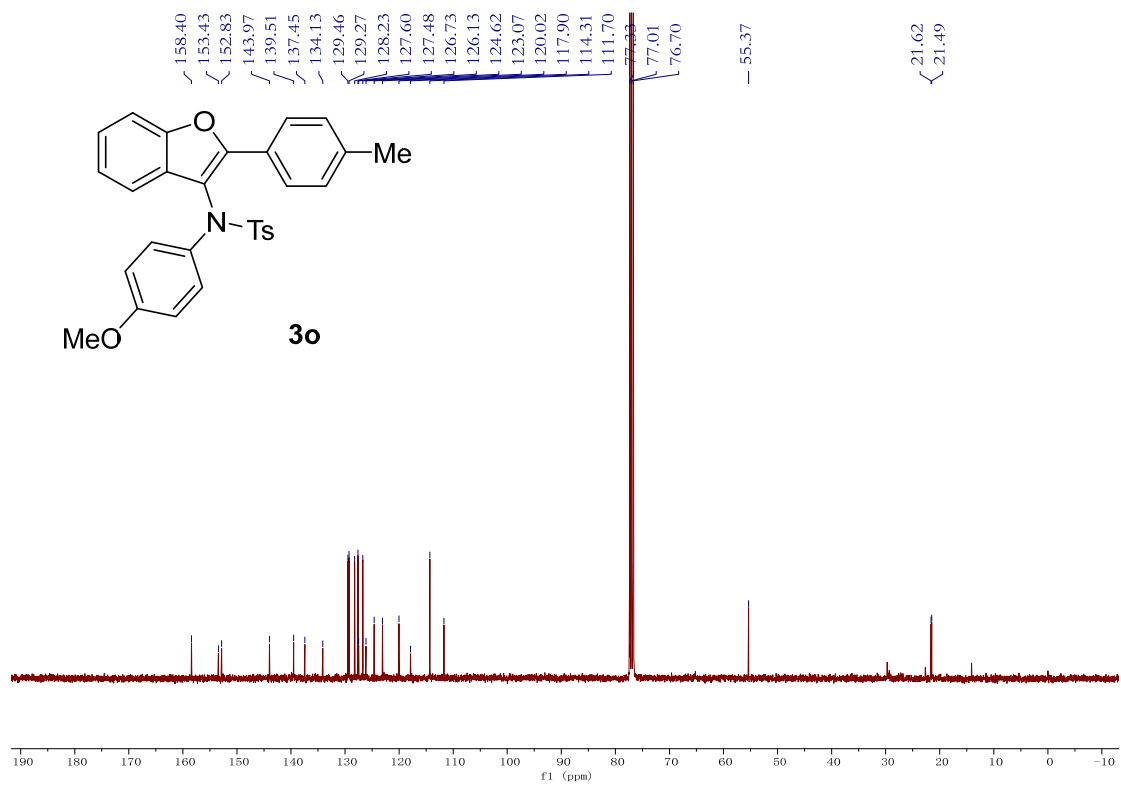

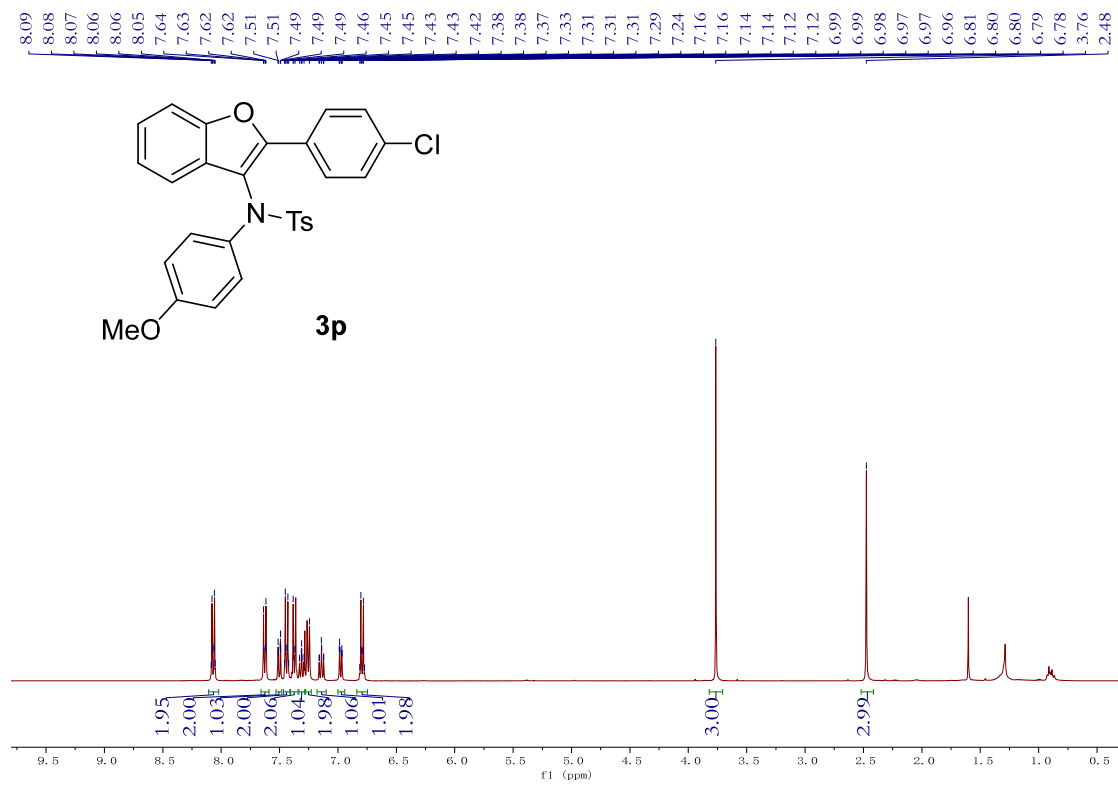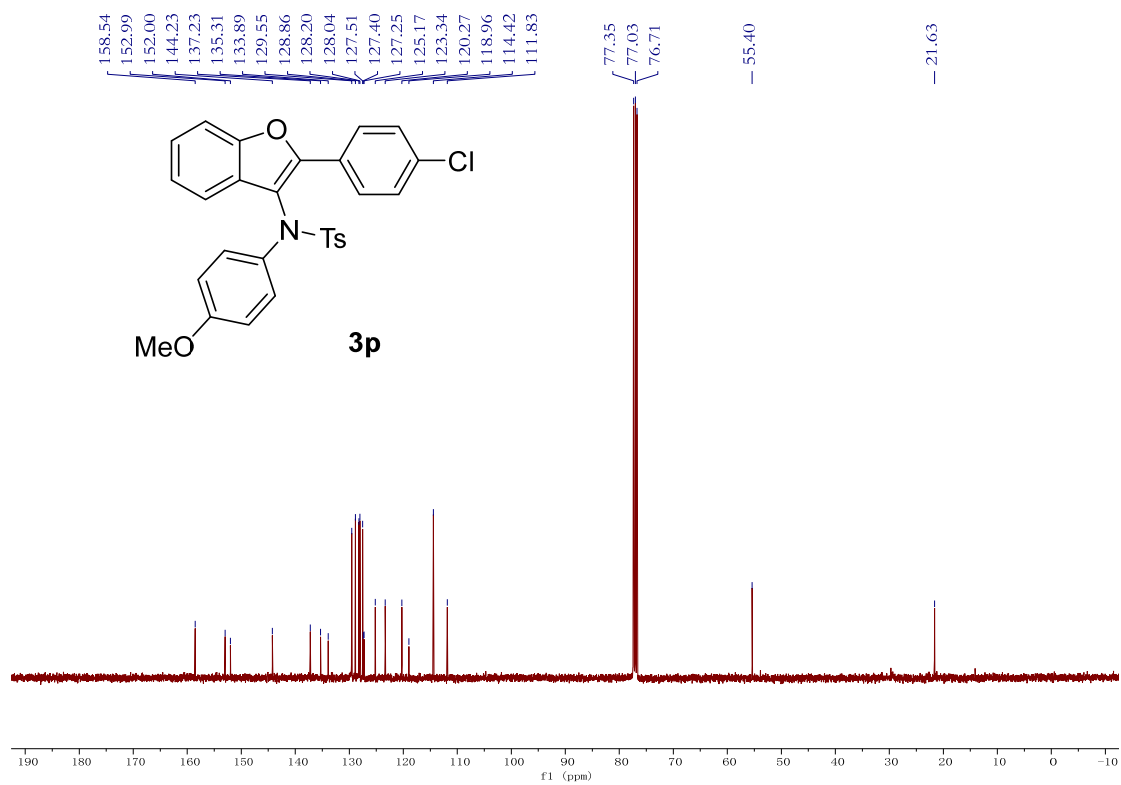

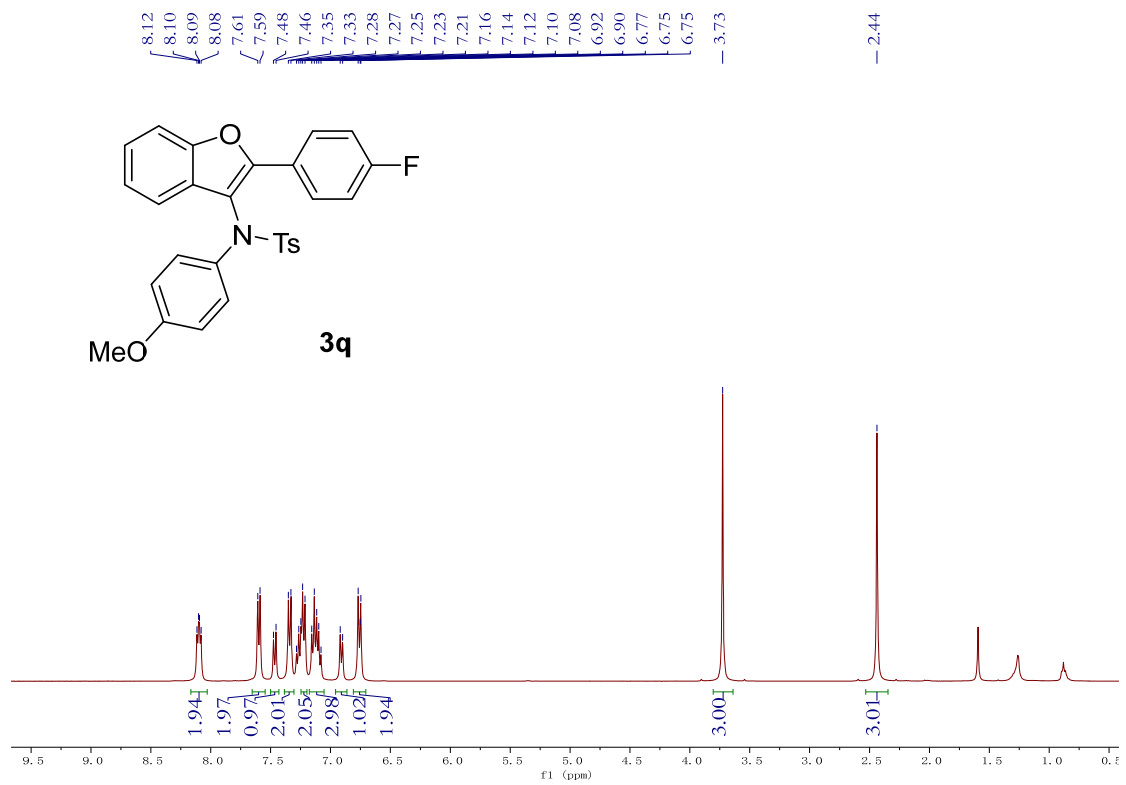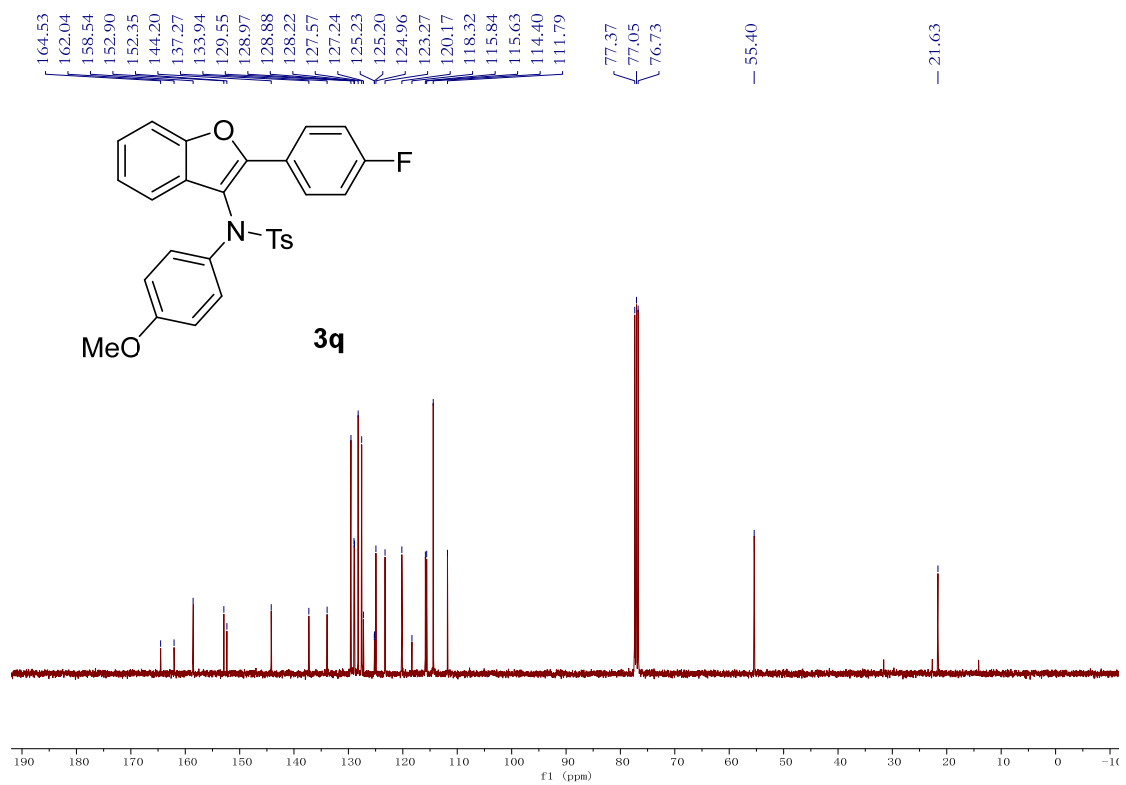

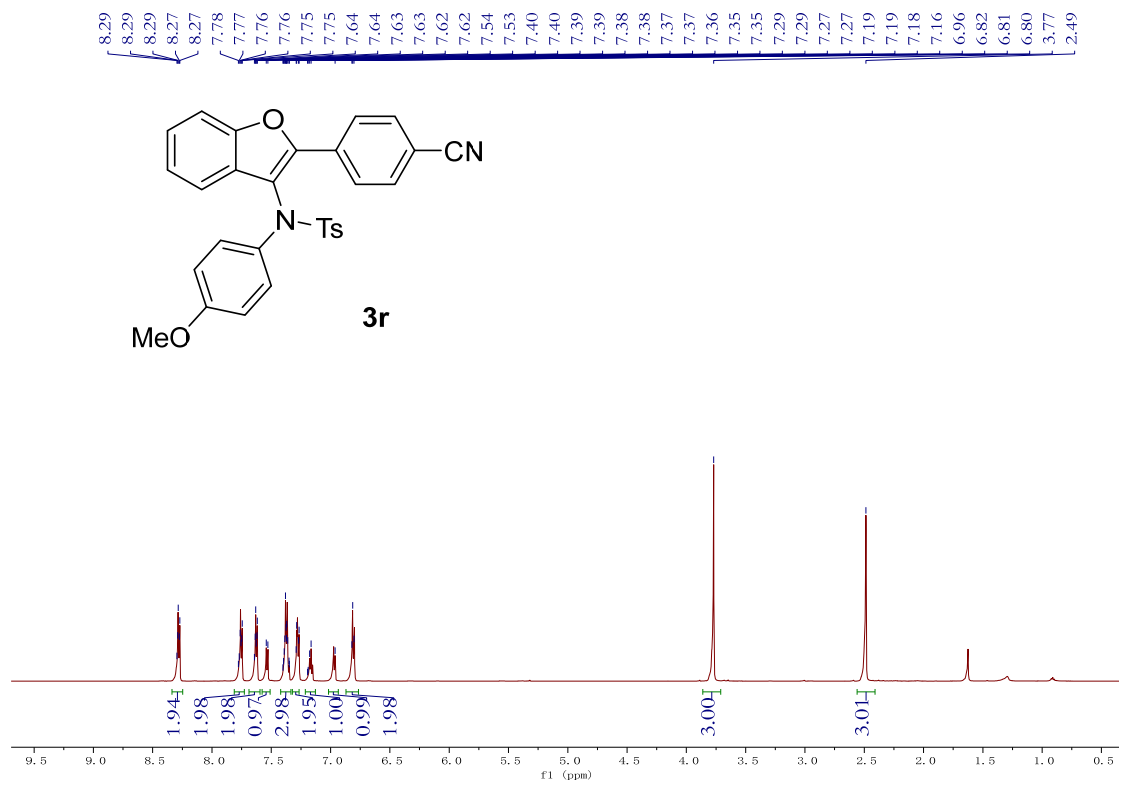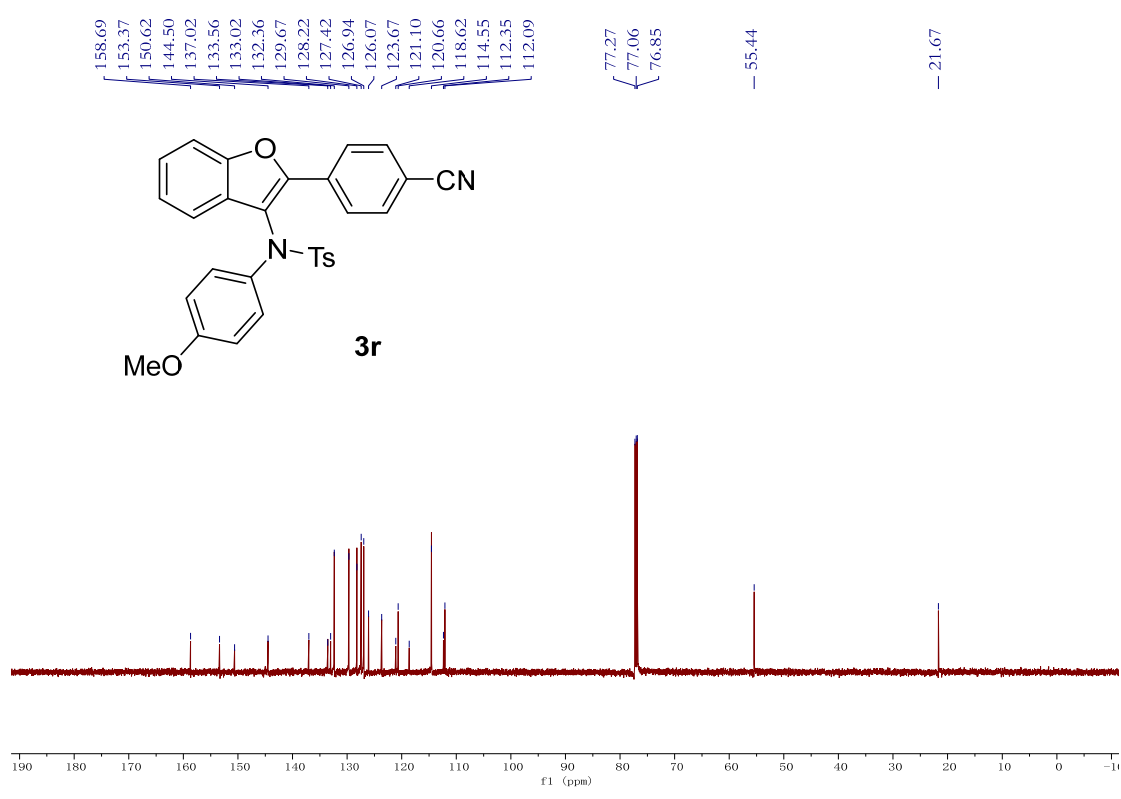

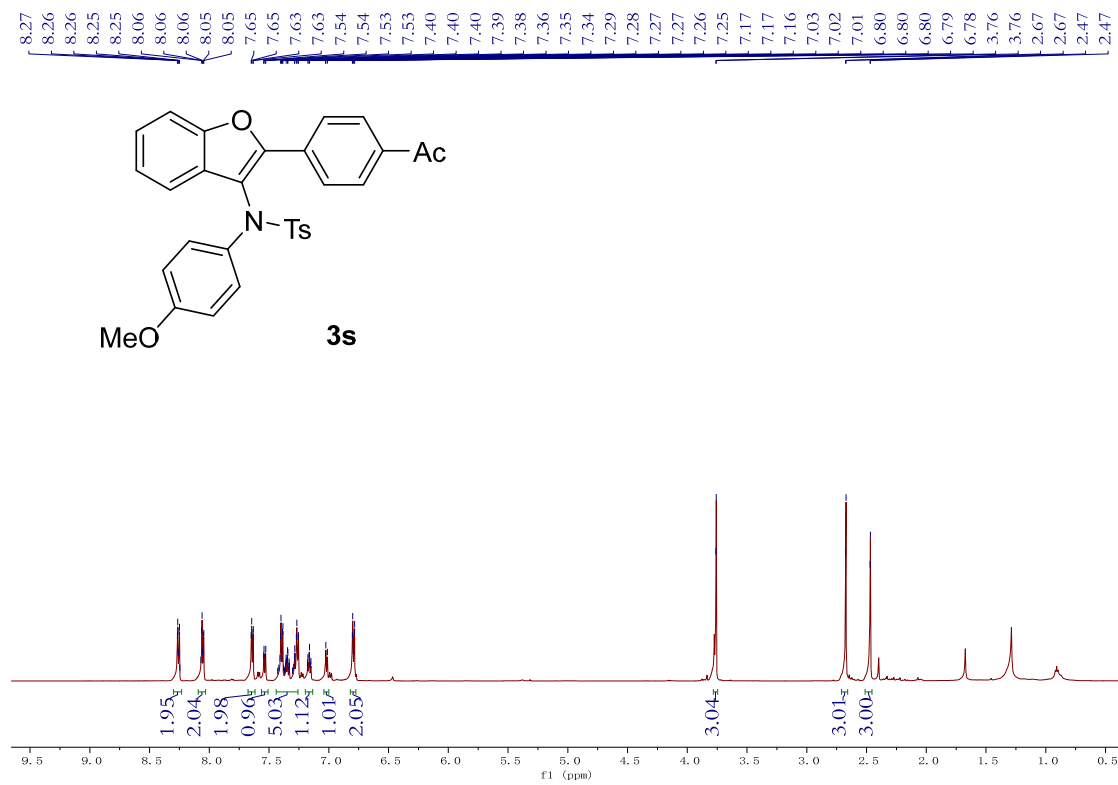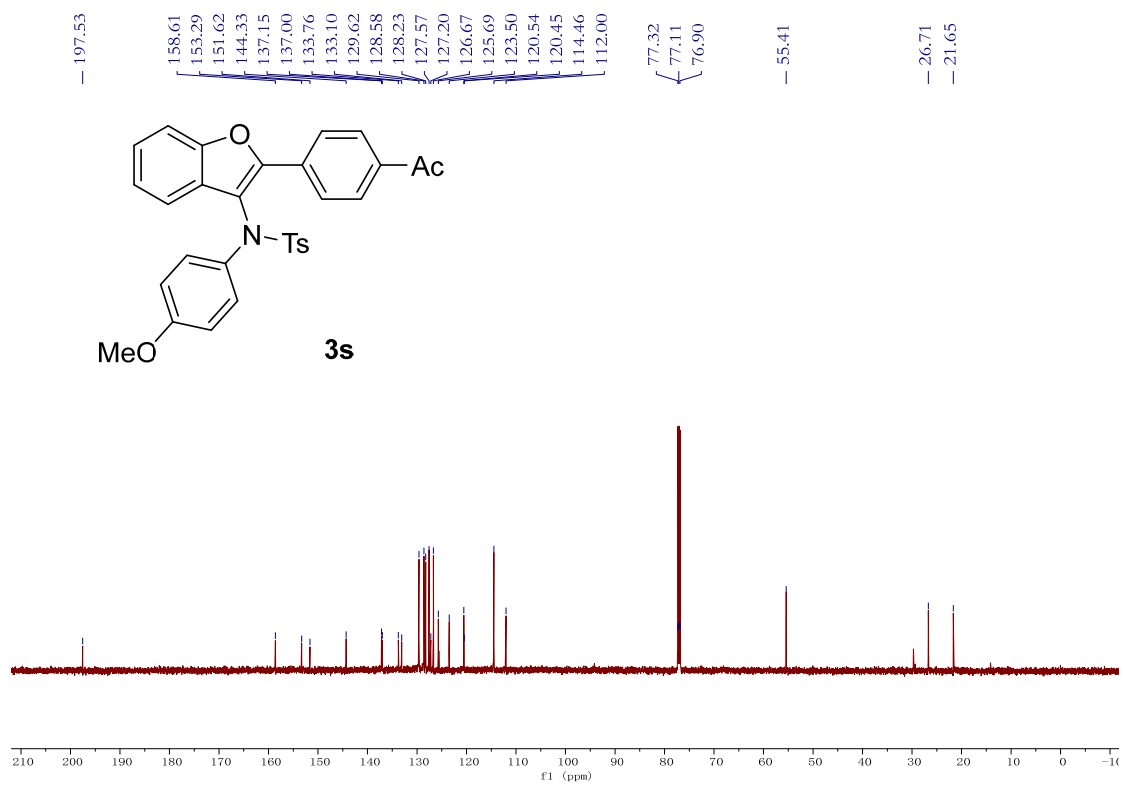

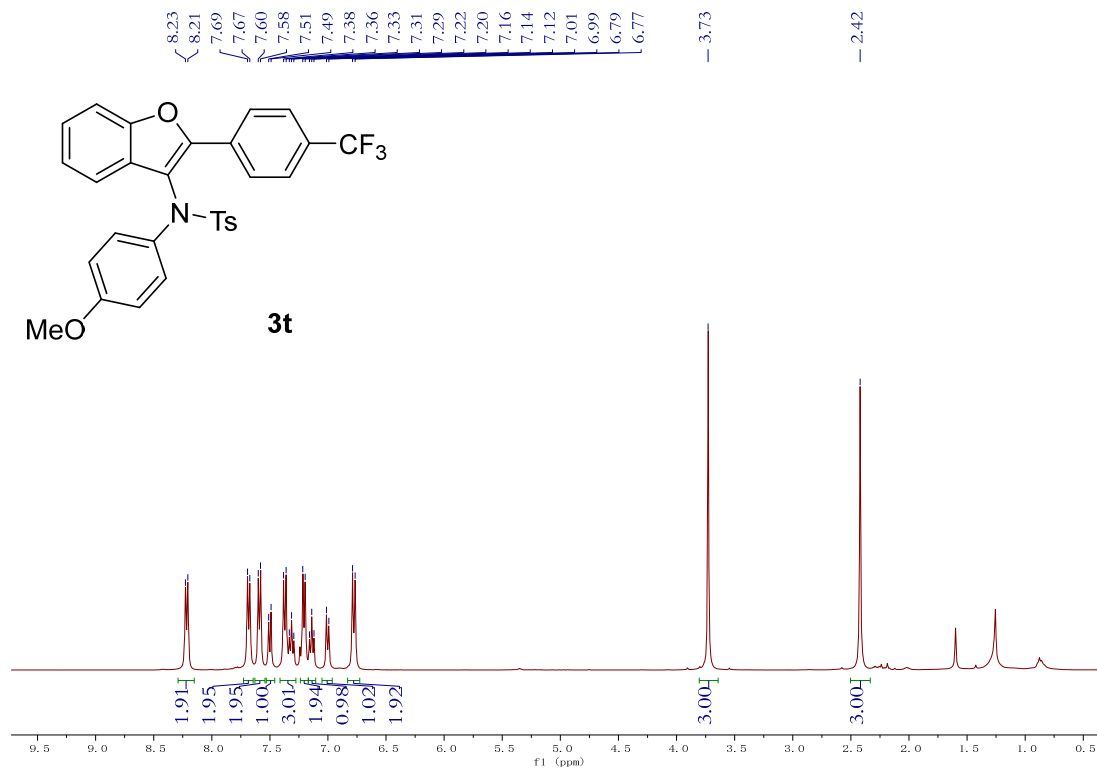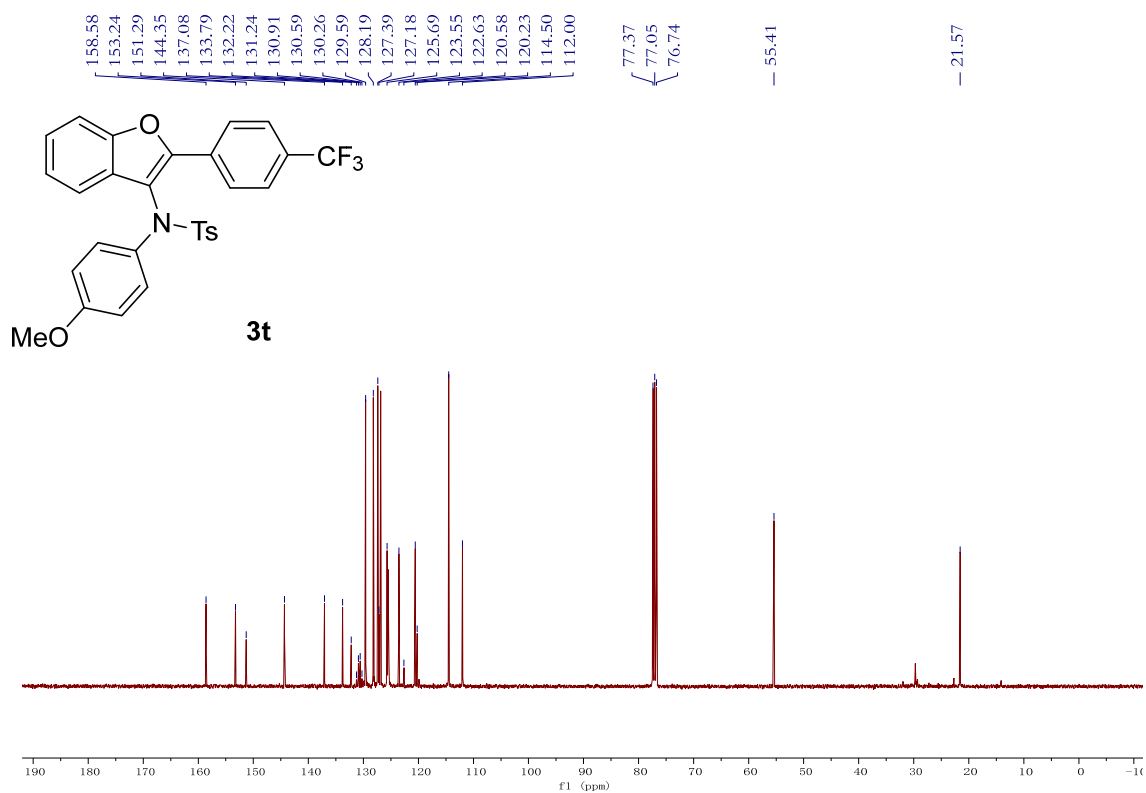

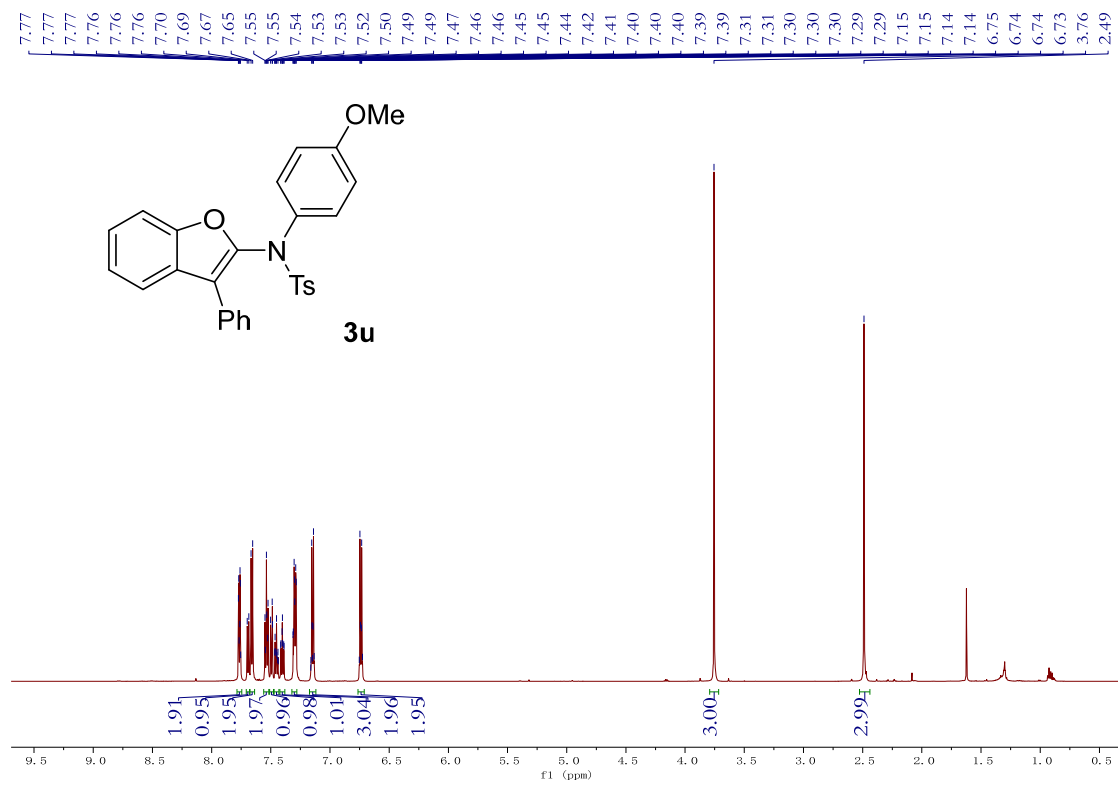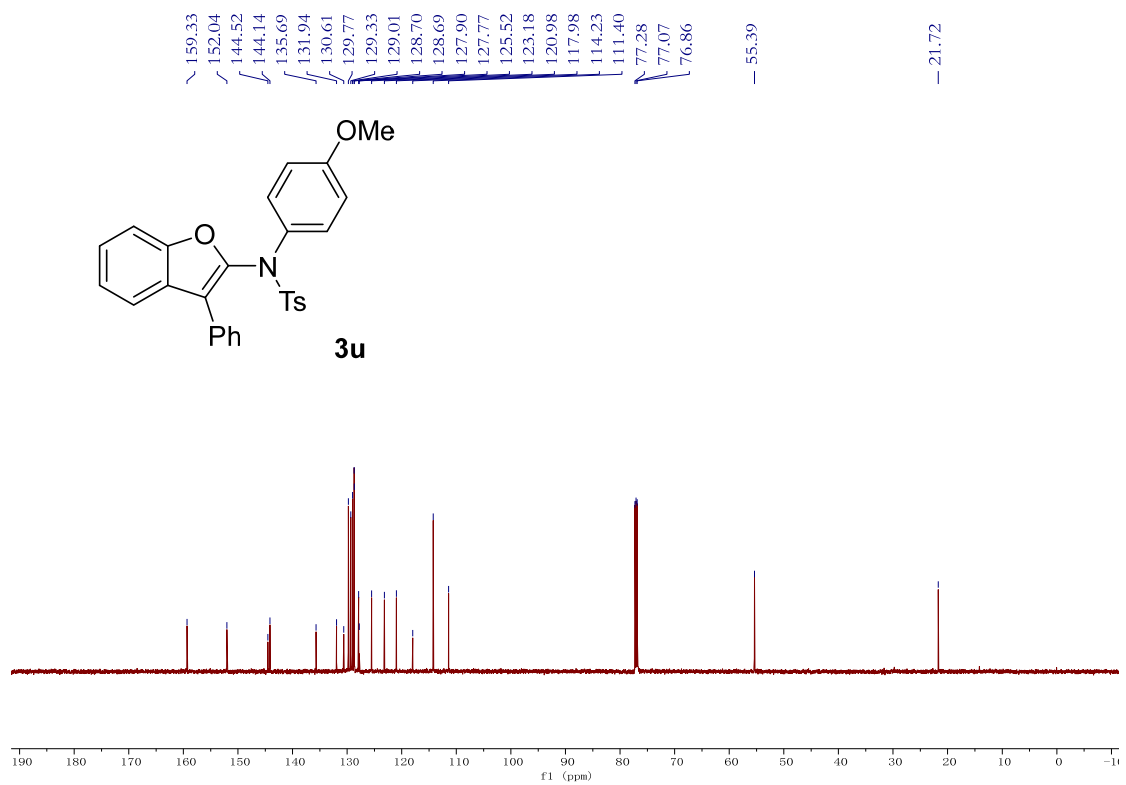



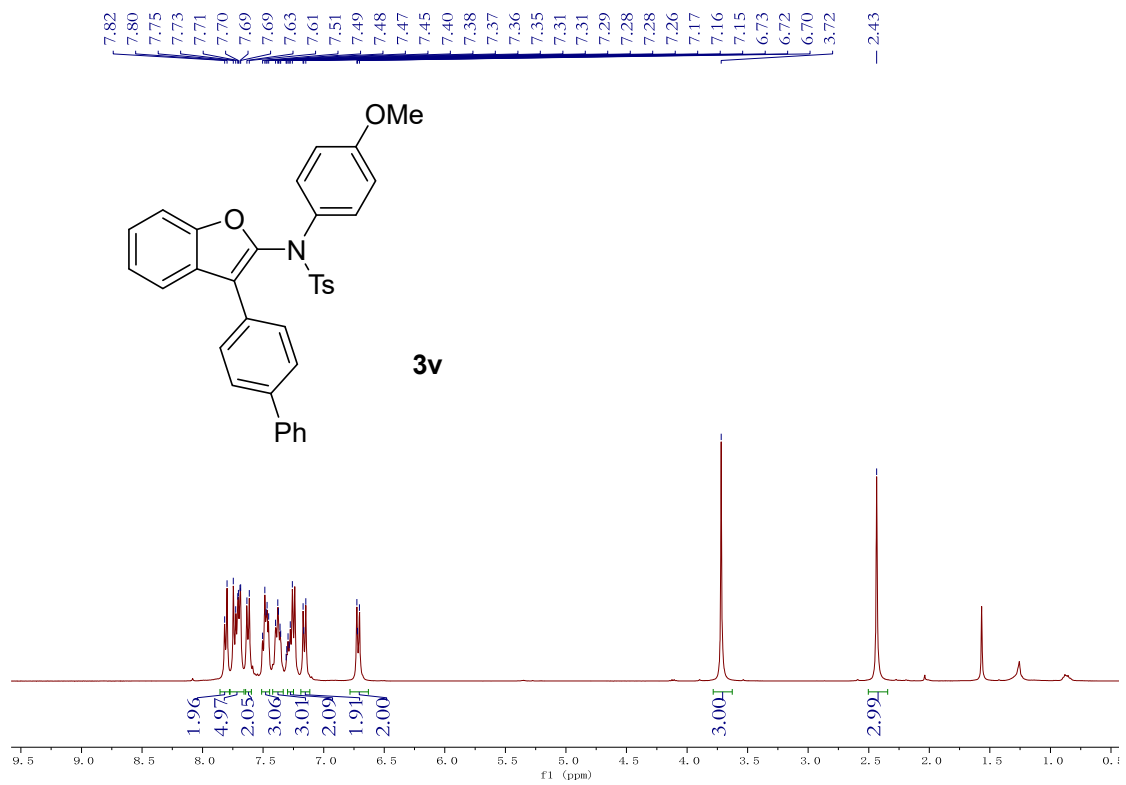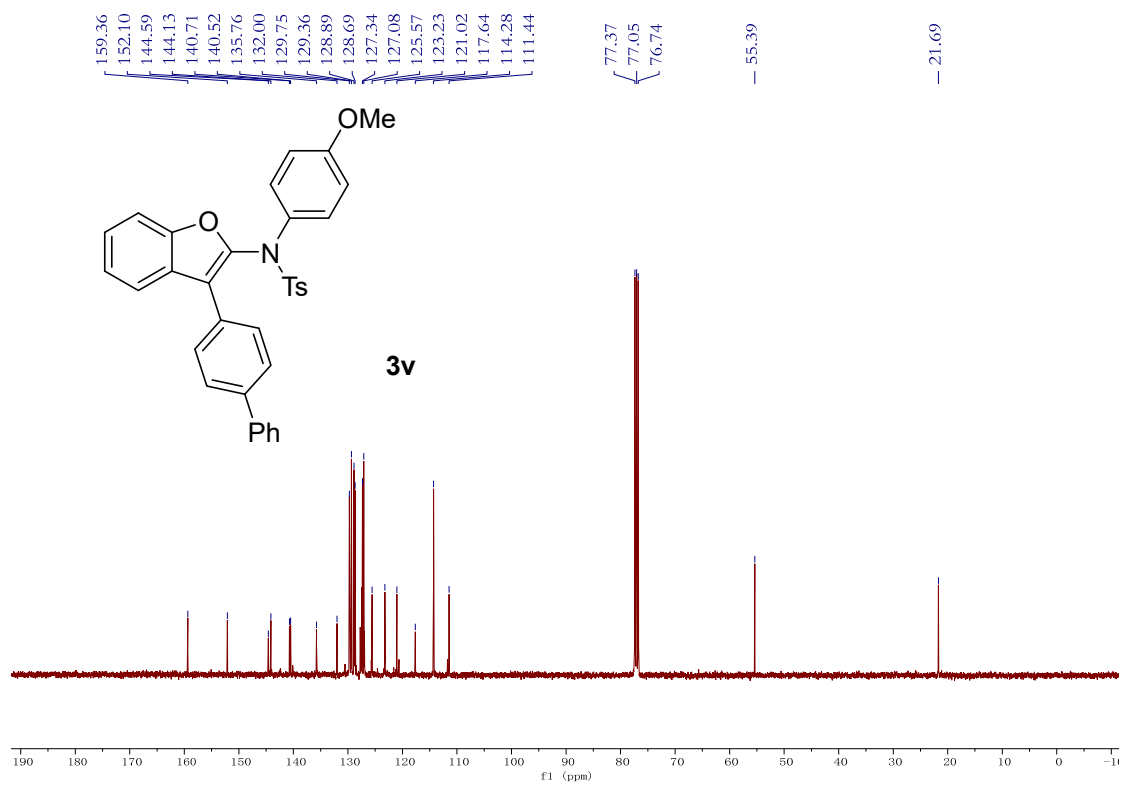

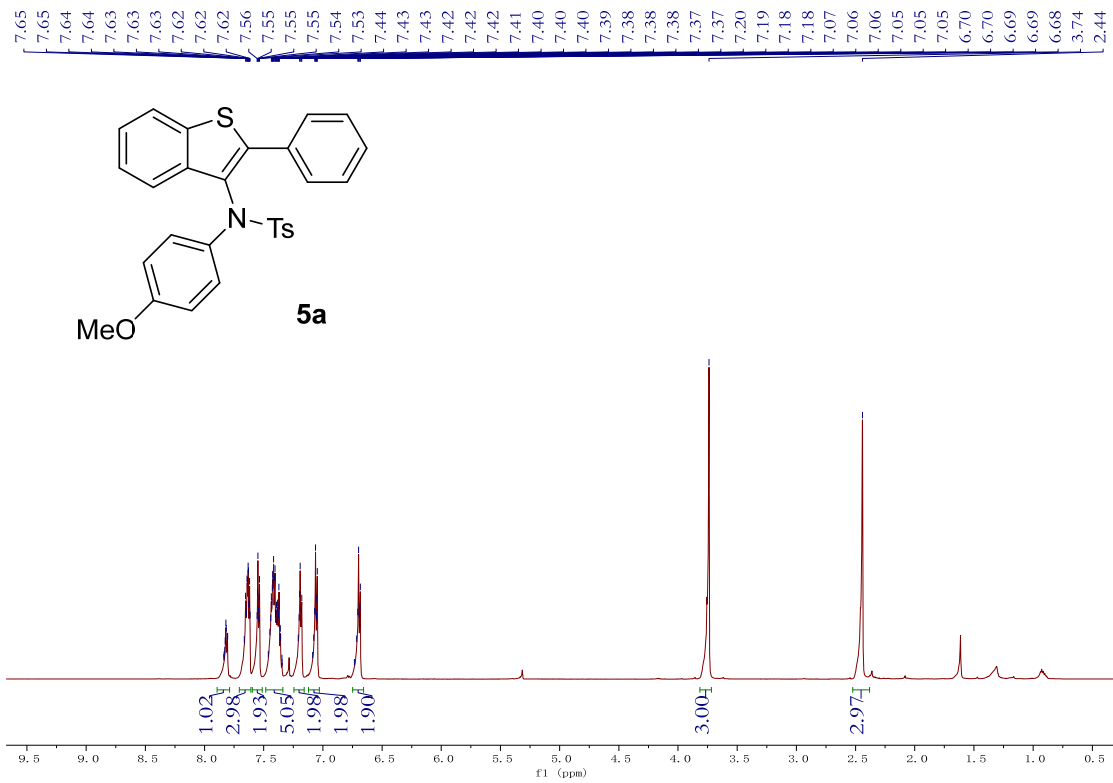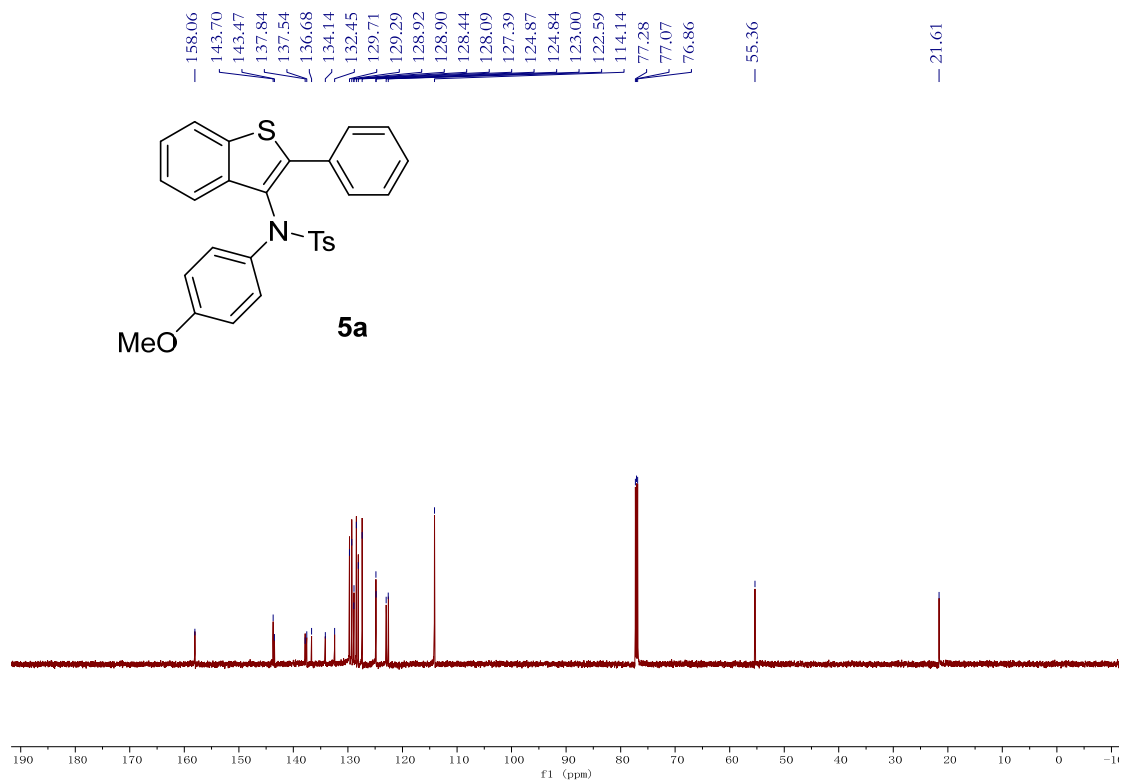

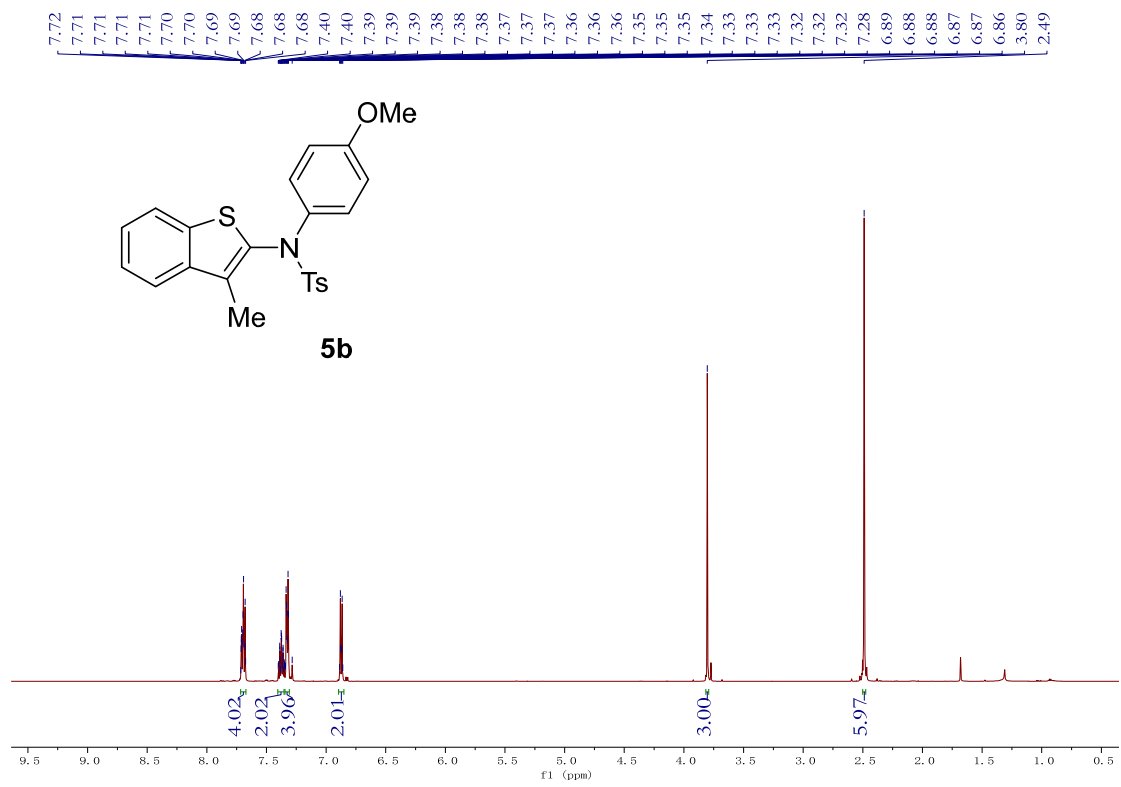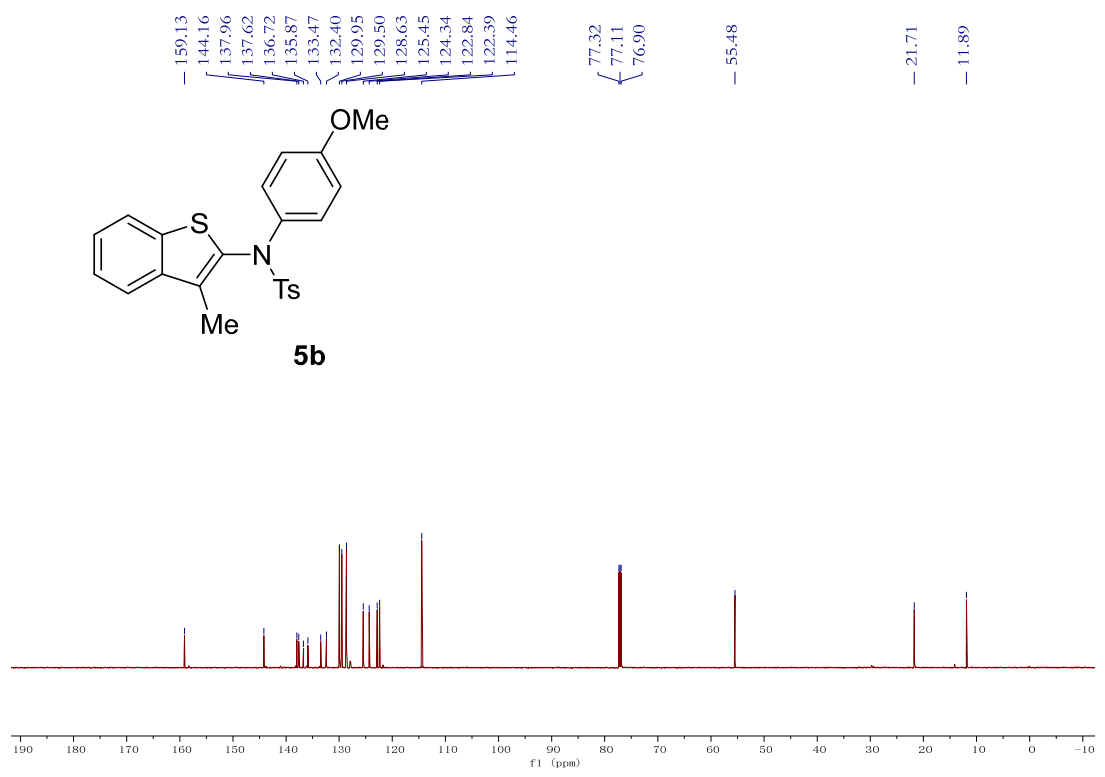

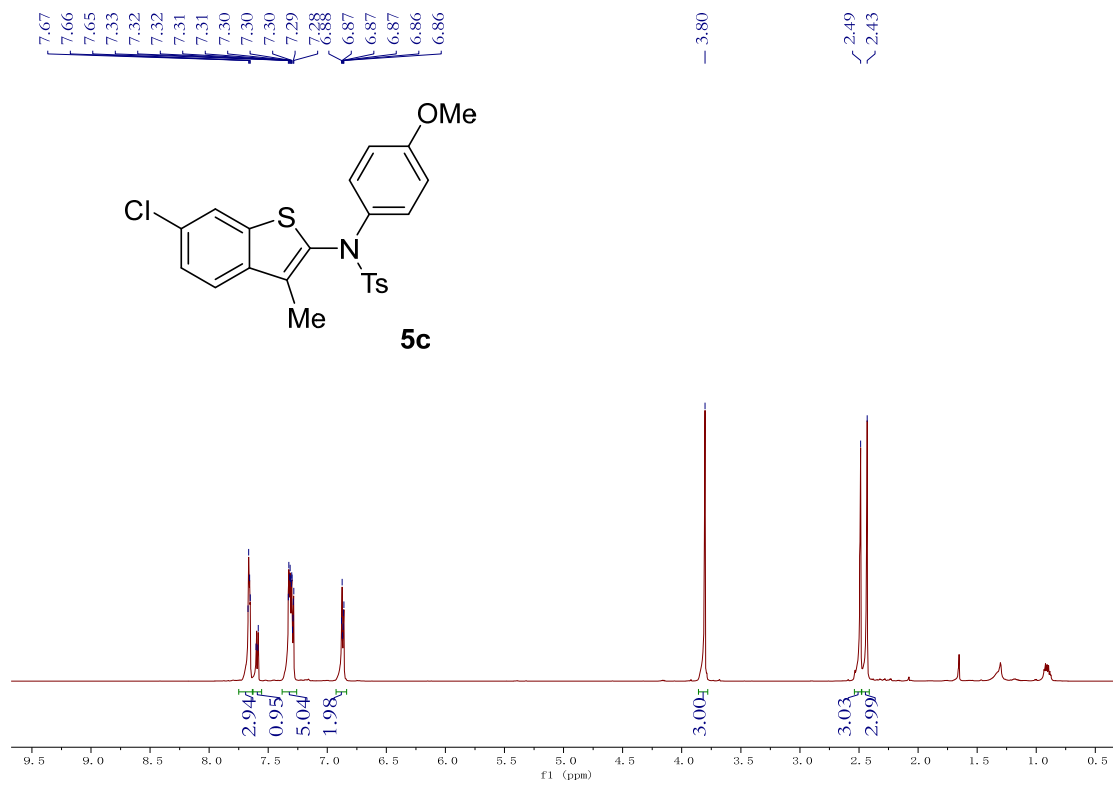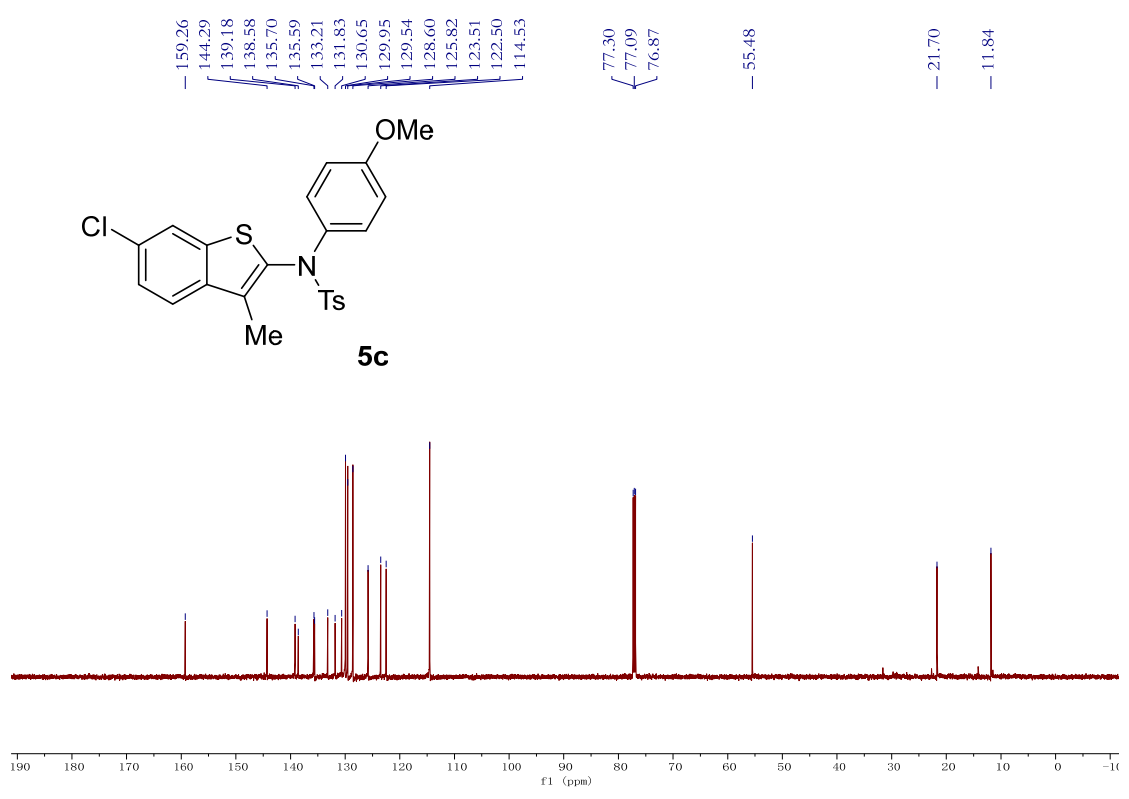

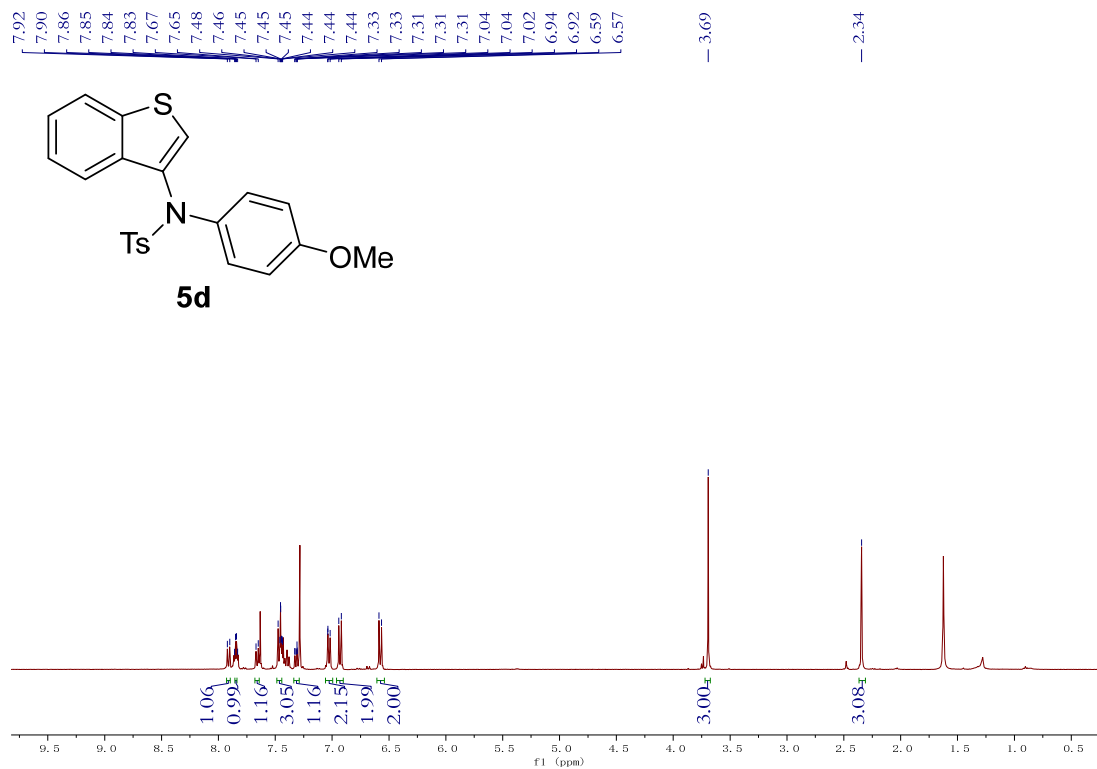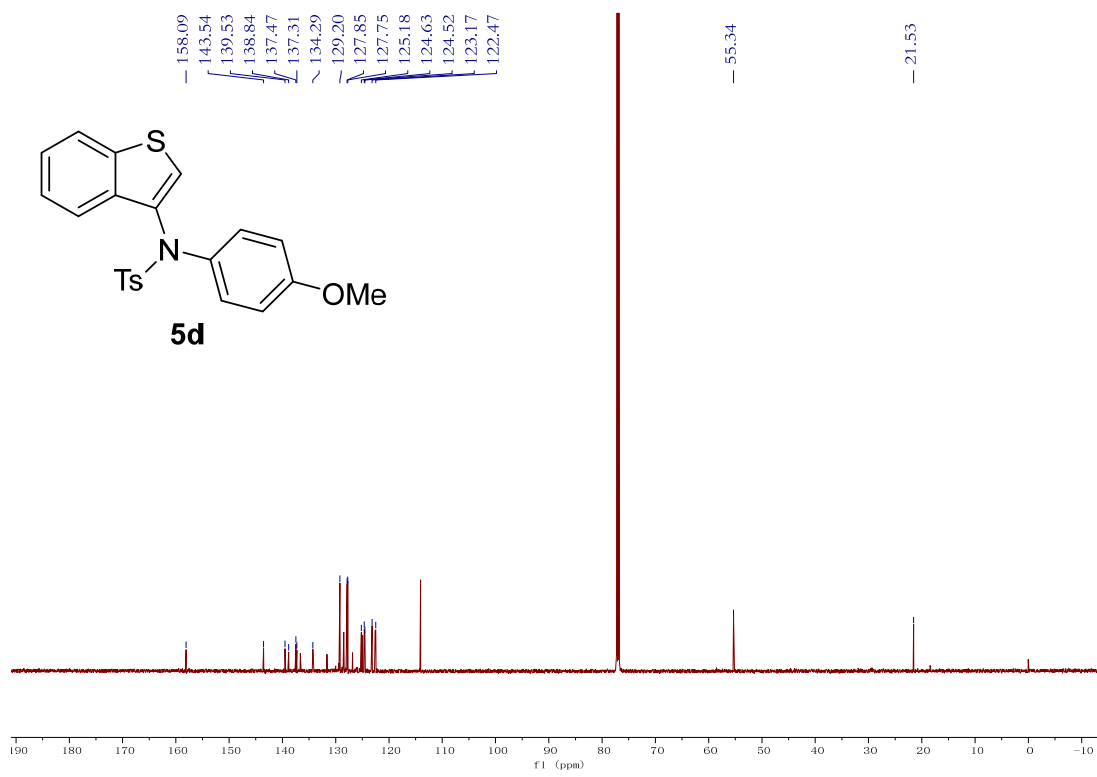

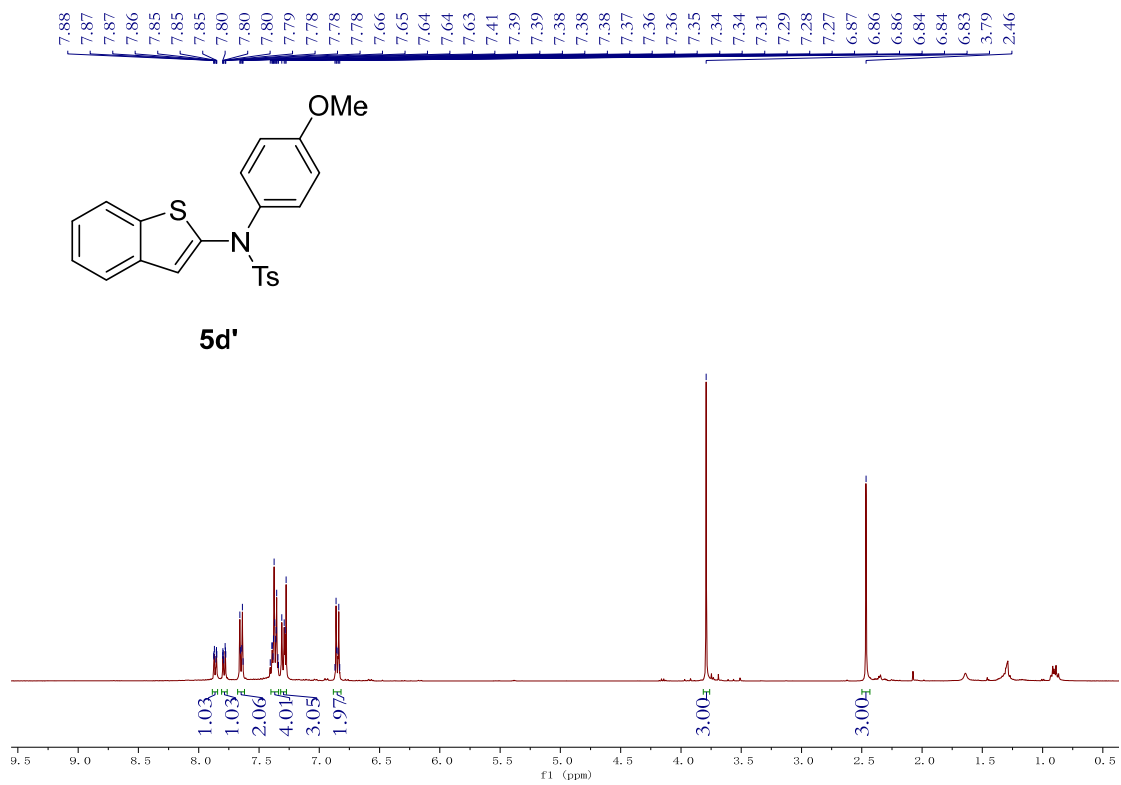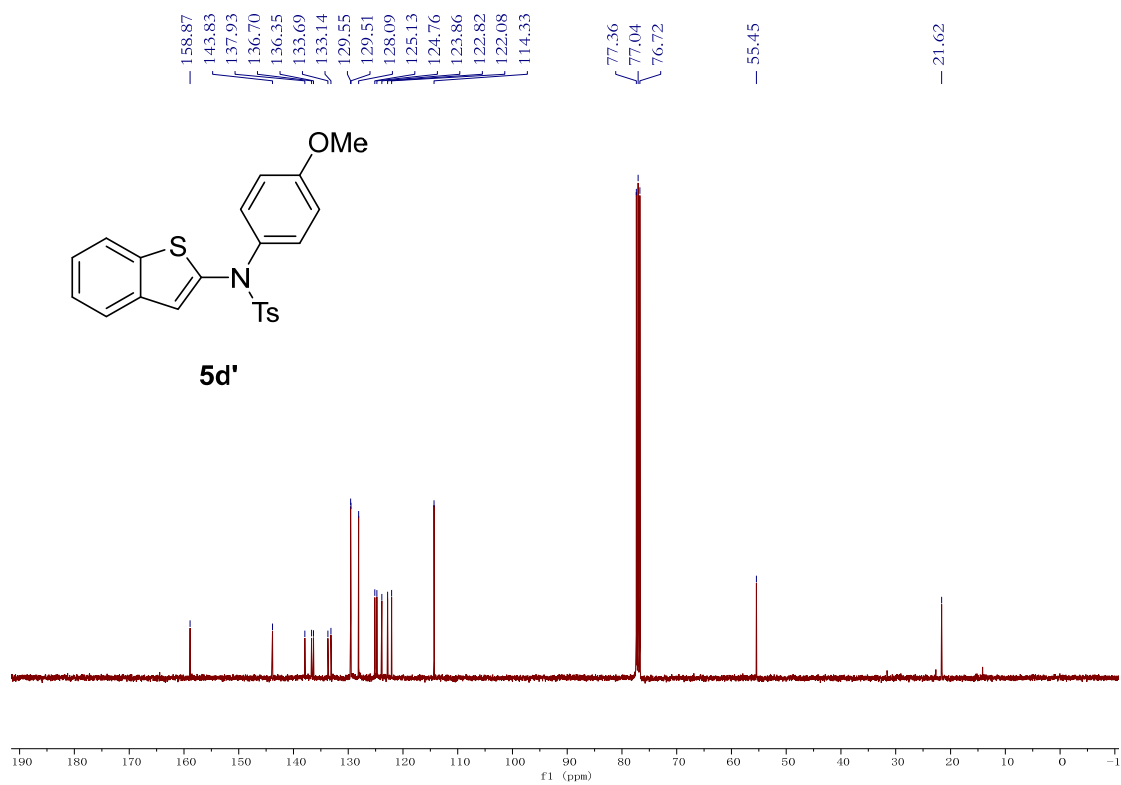

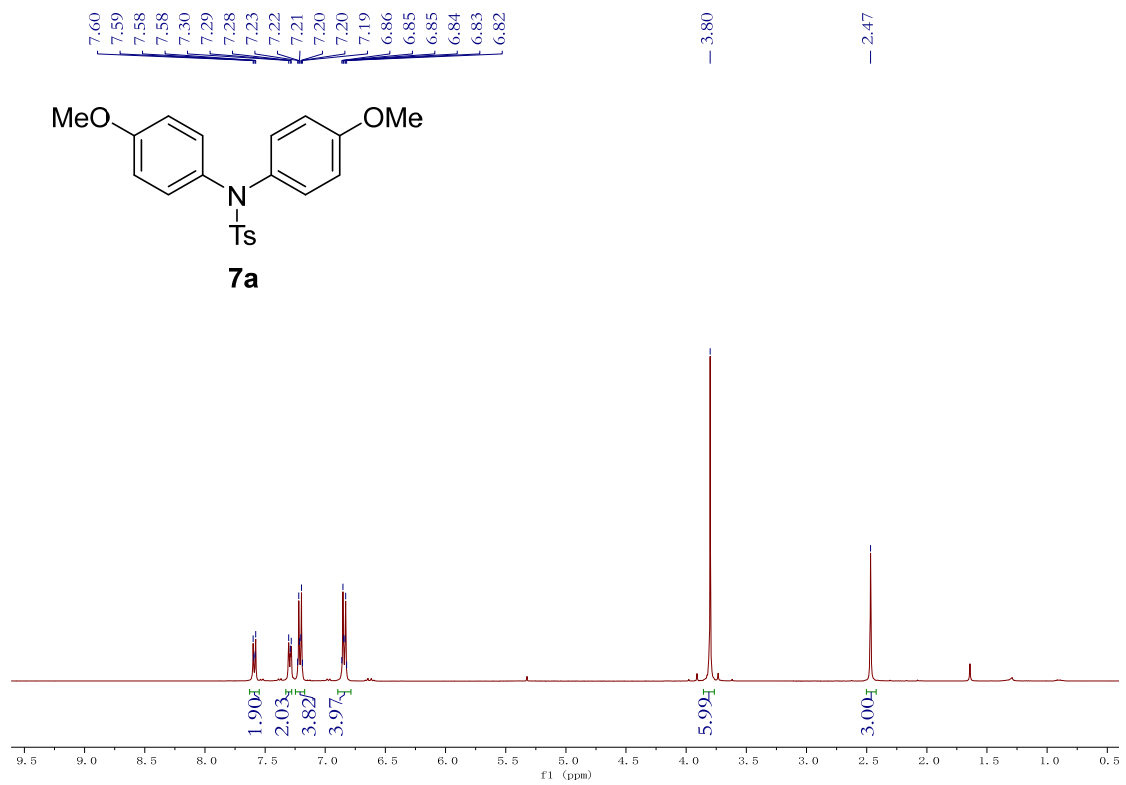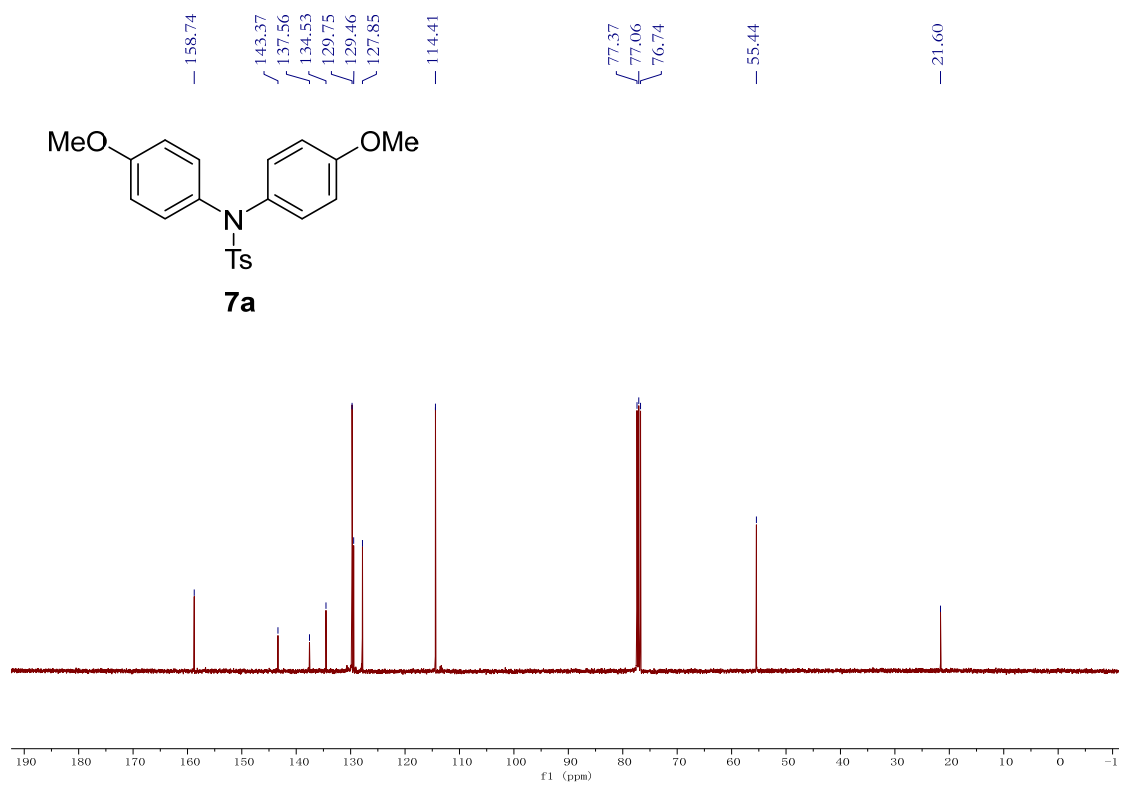

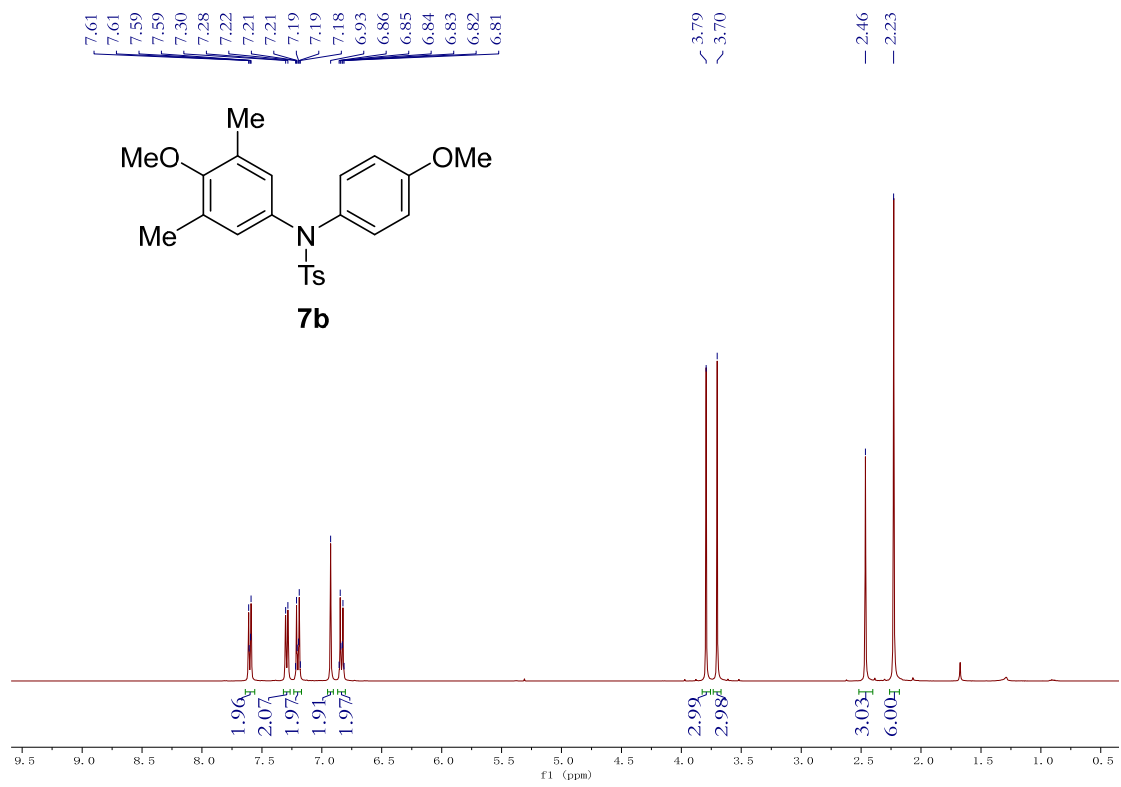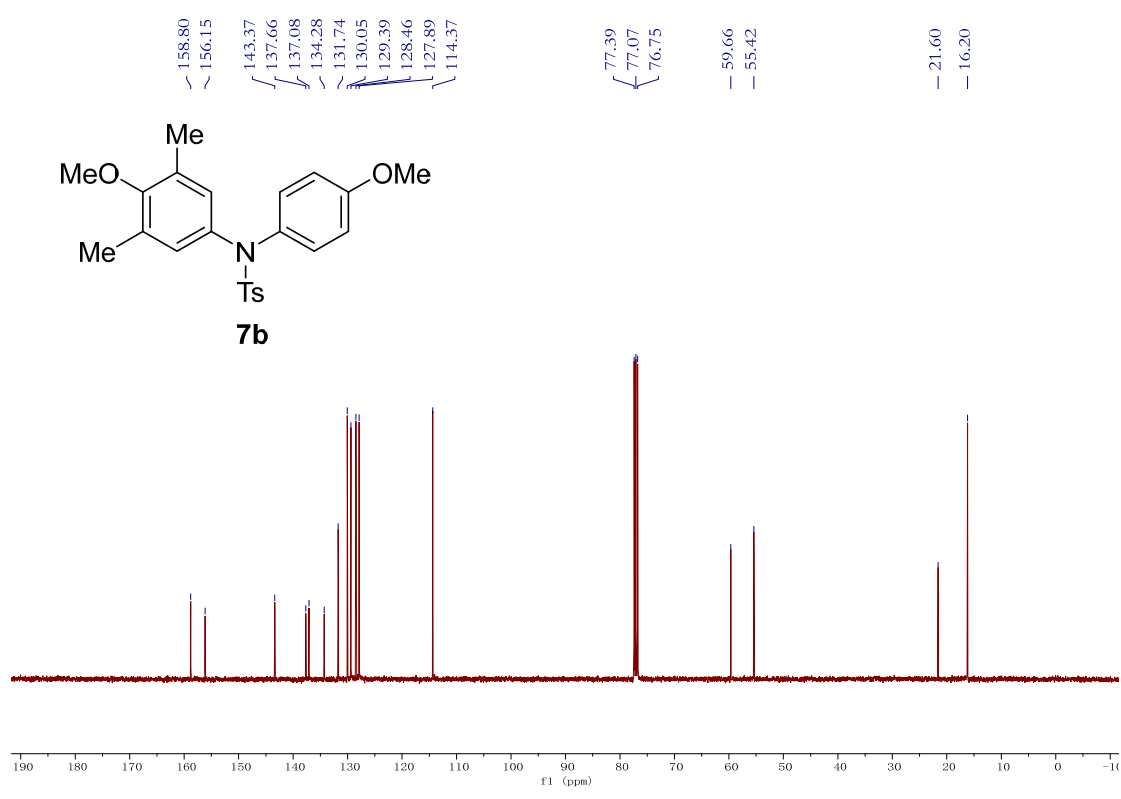



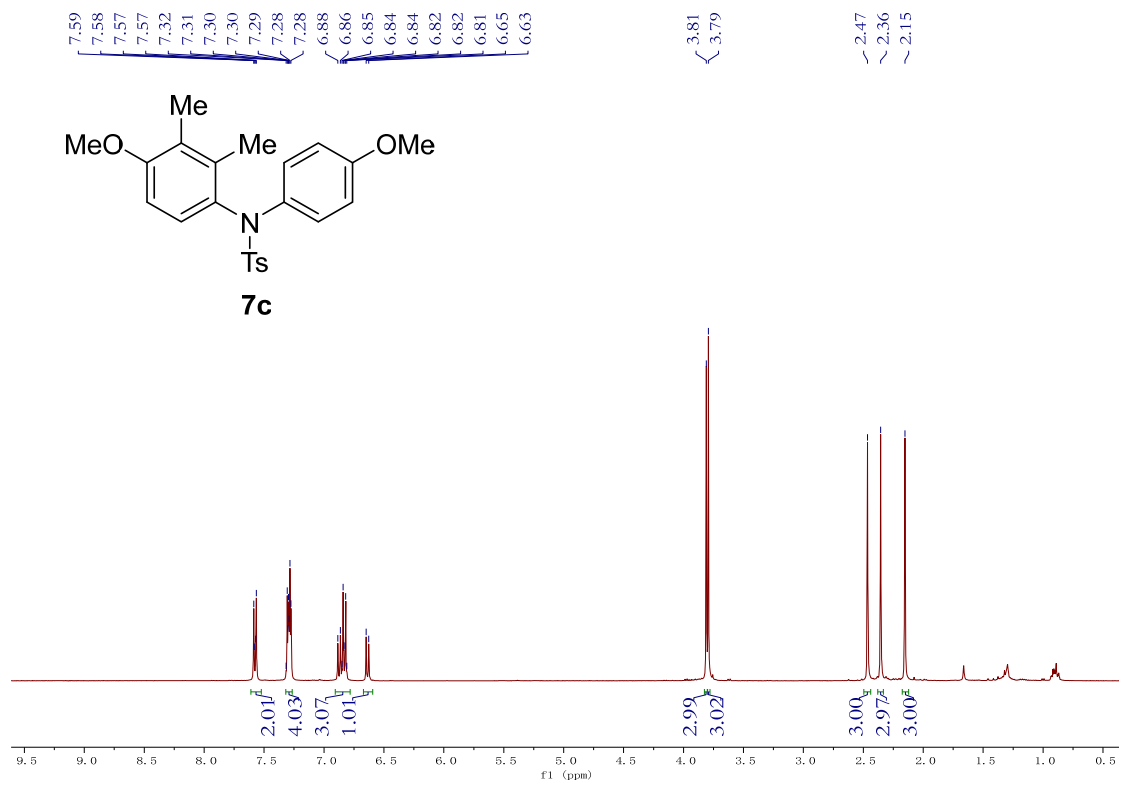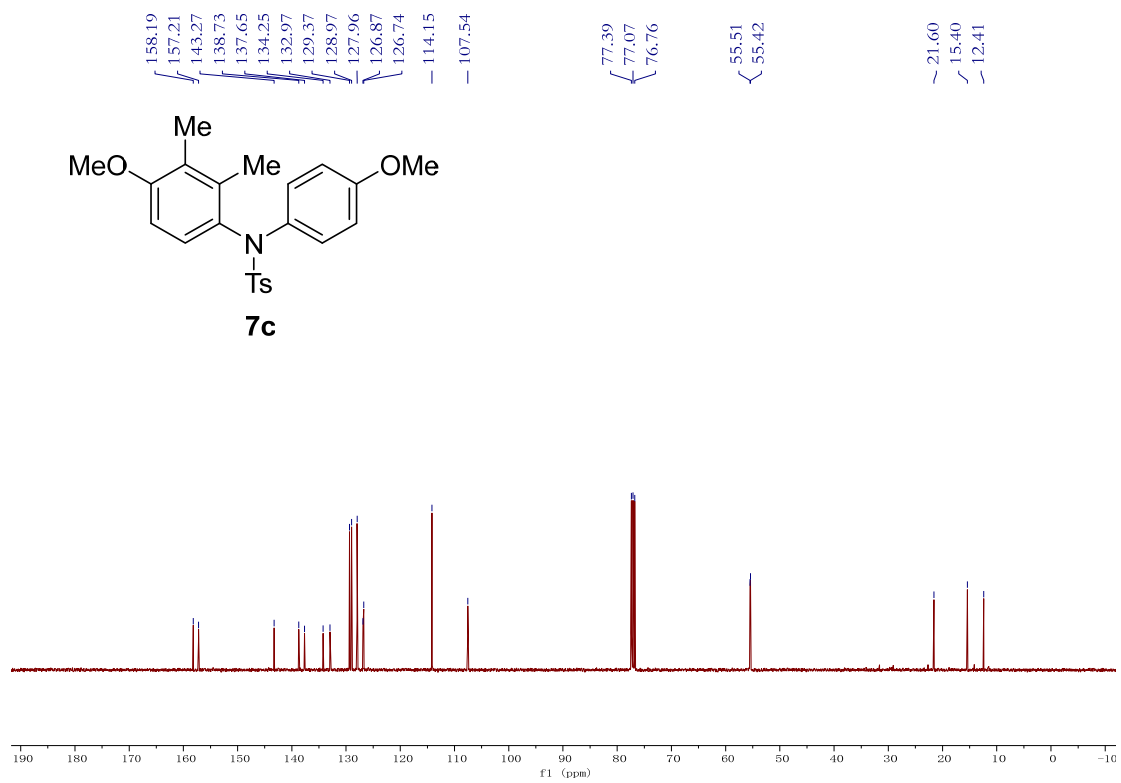

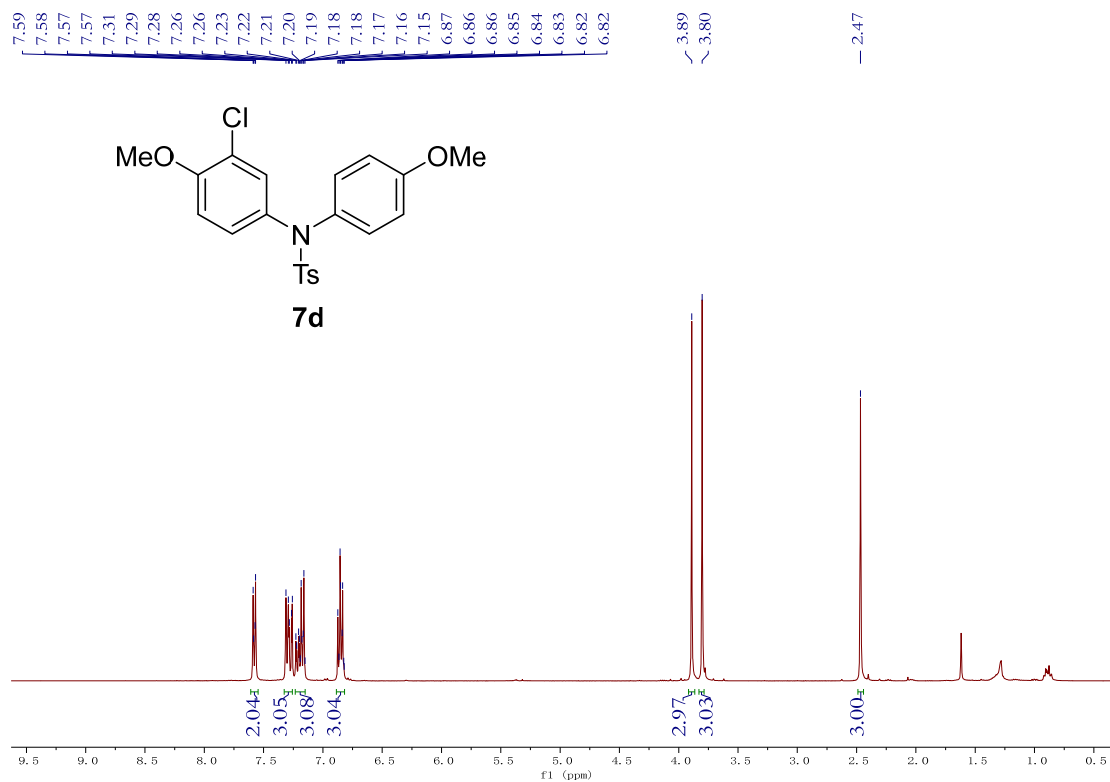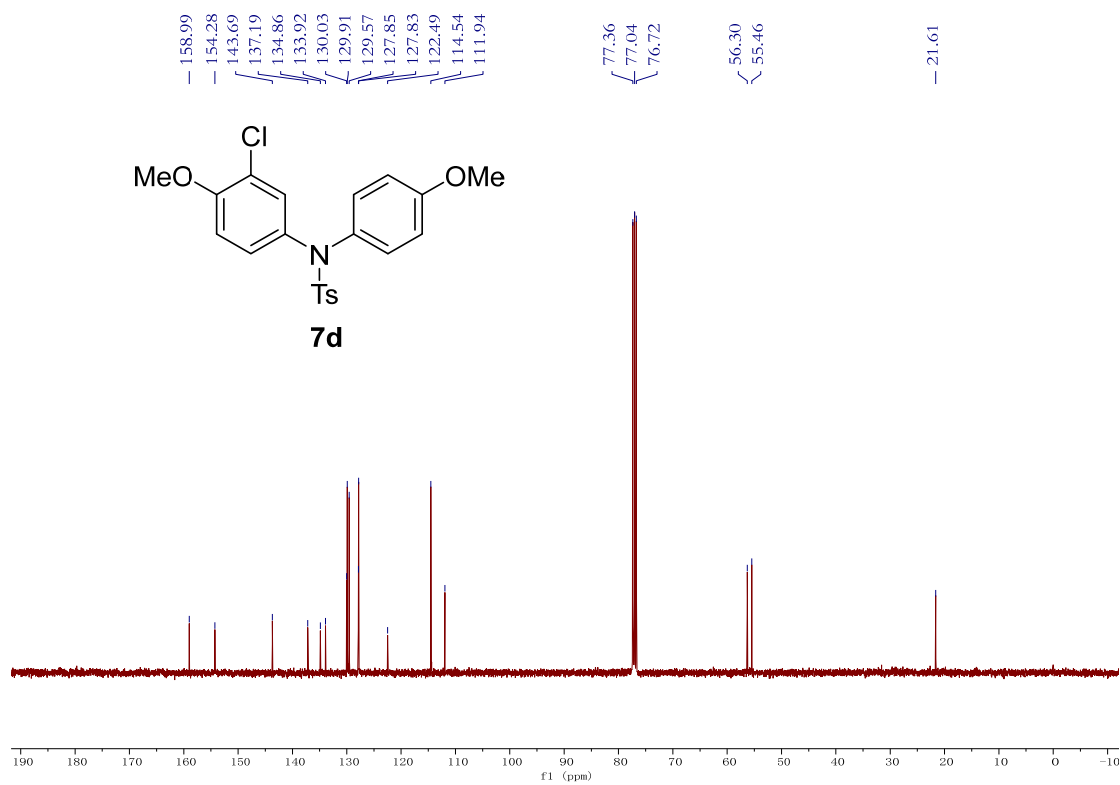

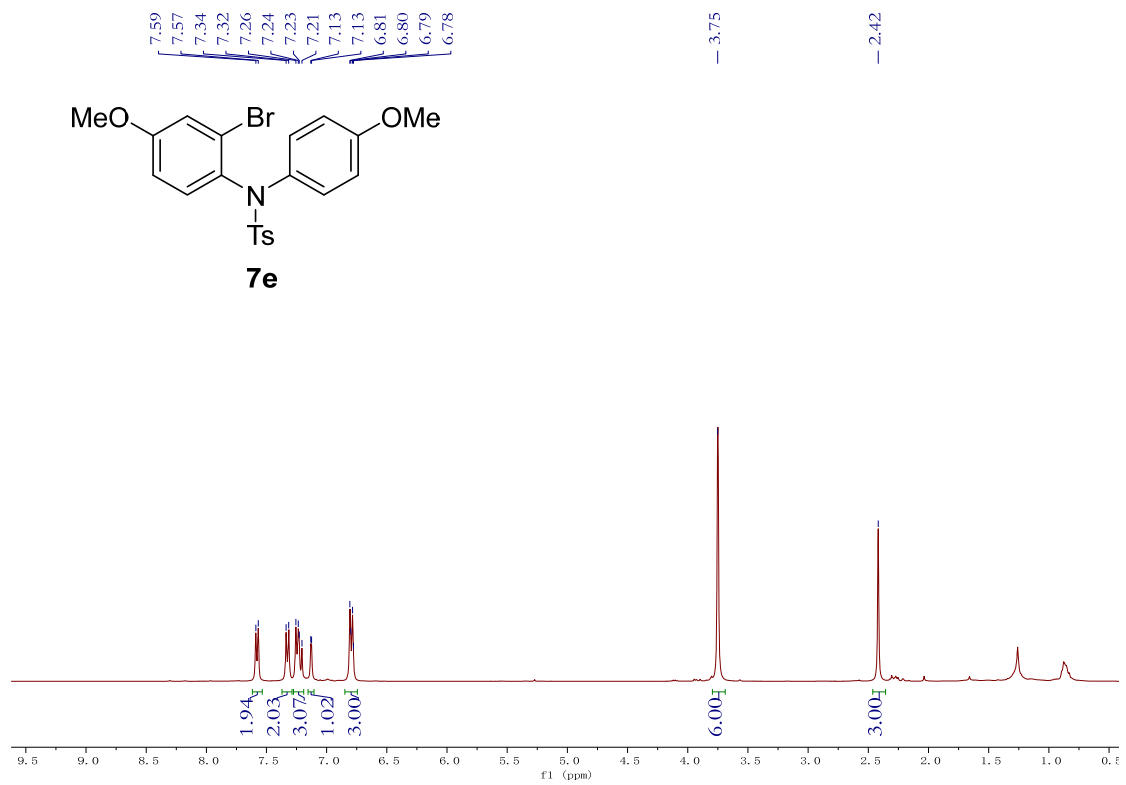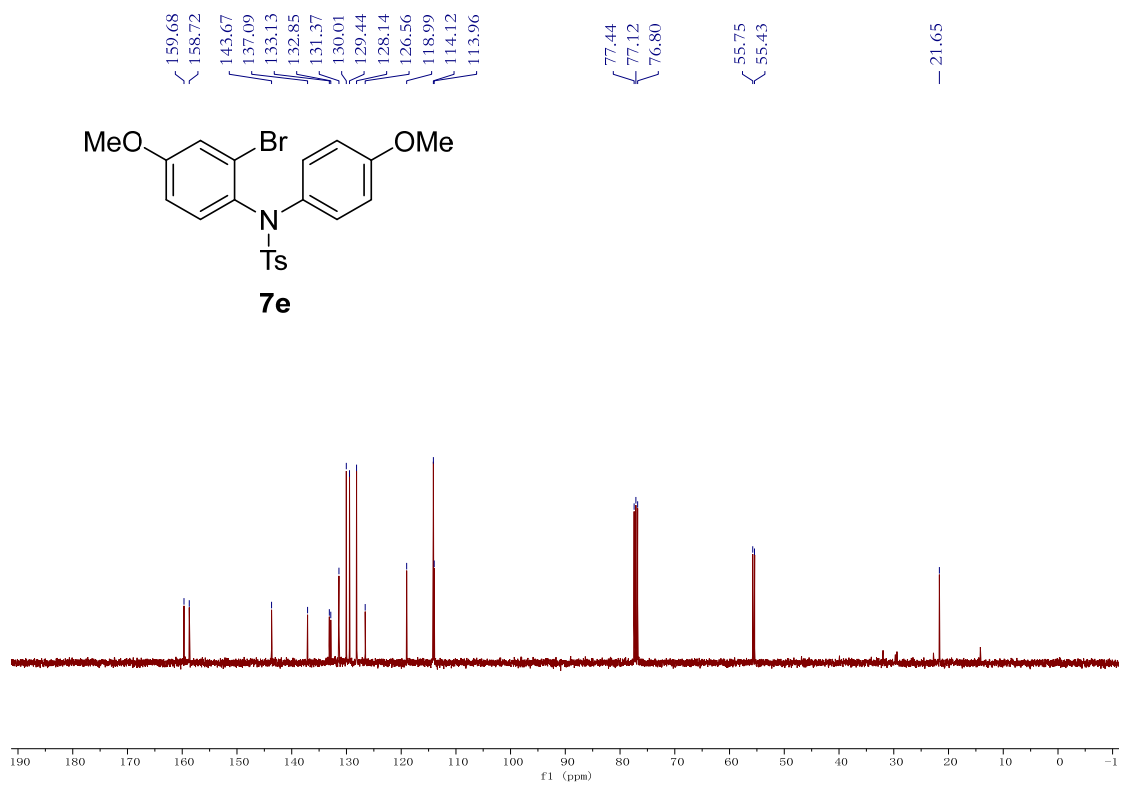

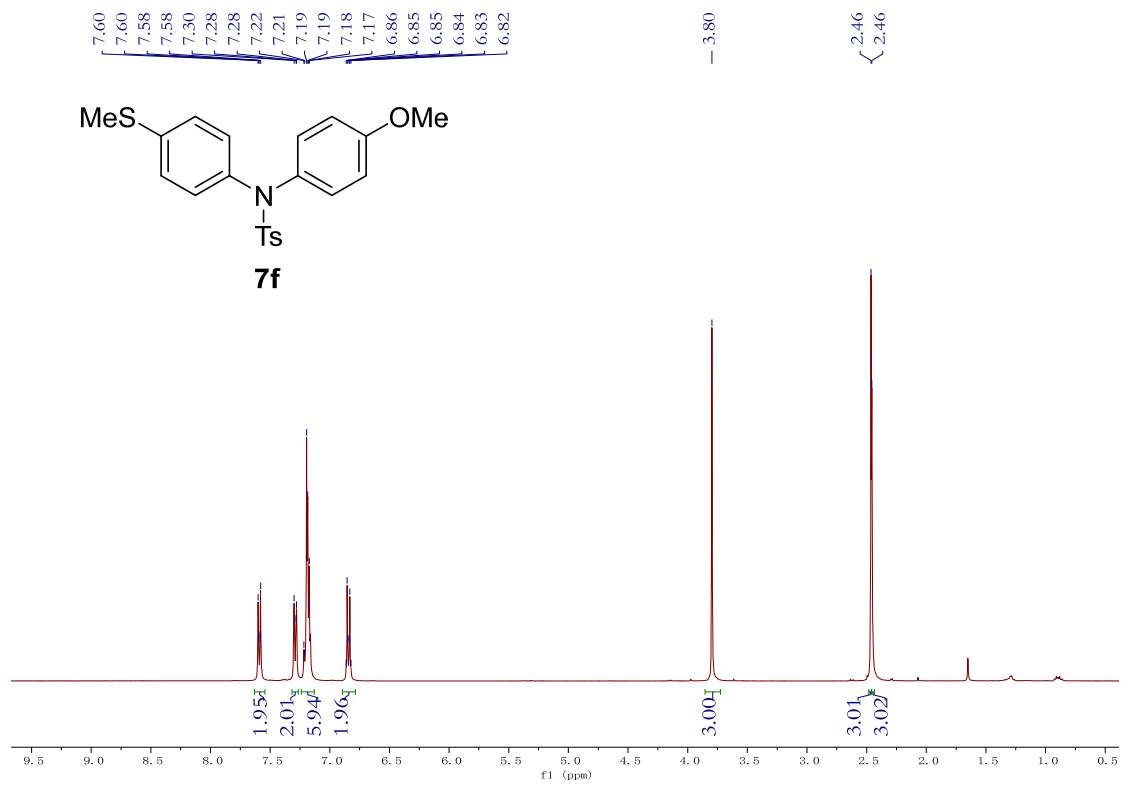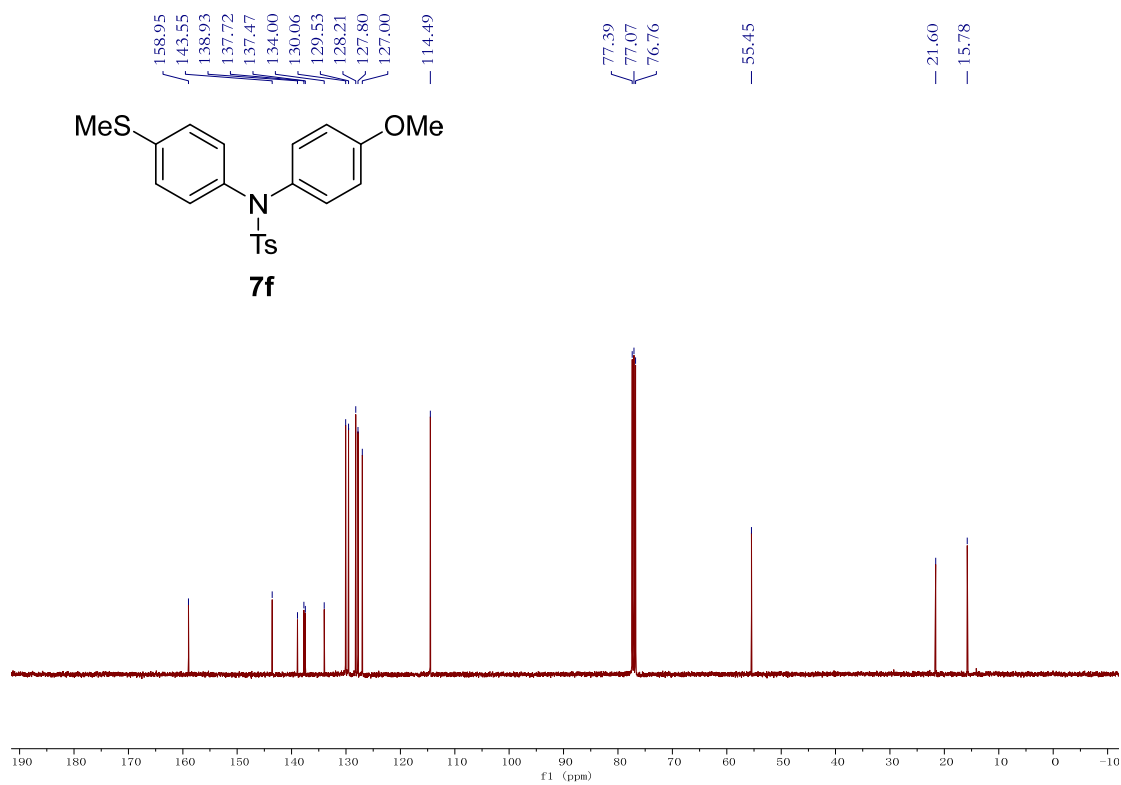

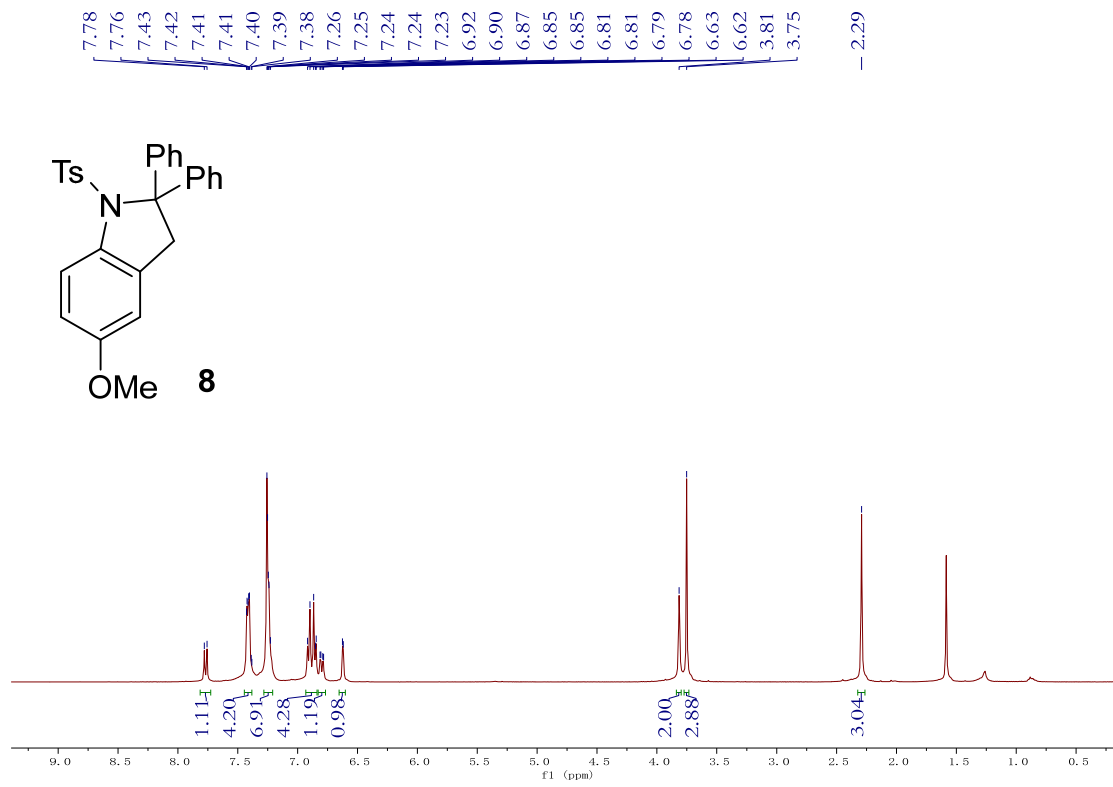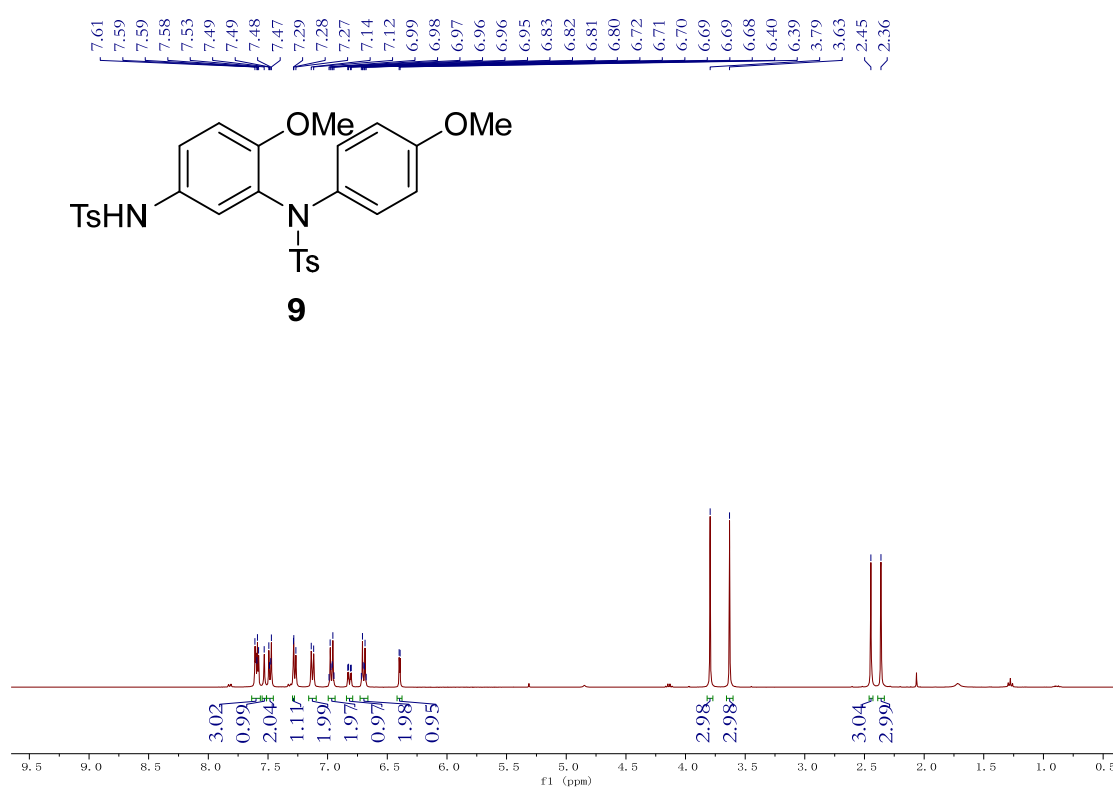

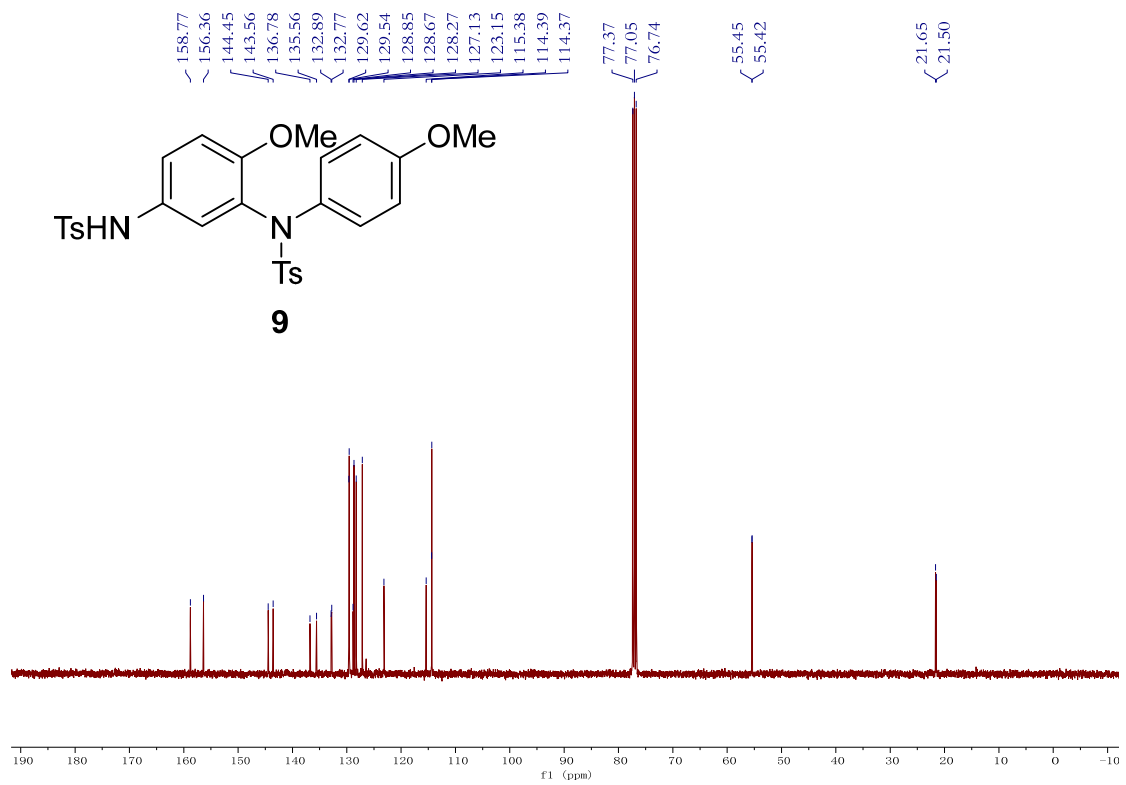

Supplement: d0qo01651a1.pdf [file d0qo01651a1.pdf]
